# Supplementary material
Source: PubMed Central journal article supplement (PMC4547307)
Supplement: pnas.1423790112.sapp.pdf [file pnas.1423790112.sapp.pdf]

## Supporting Information

Janouškovec et al.: Plastid dependency and the early evolution of apicomplexans and their free-living relatives.

### SI Materials and Methods:

#### 1. Environmental sequencing and data analysis:

Environmental samples were collected in sterile Eppendorfs or Falcon tubes at several locations around Vancouver, BC, Canada (Table S1). DNA was extracted as soon as possible on the day of collection using using 0.5 - 1 g of sample material. Corals were healthy specimen sampled at the Birch Aquarium, Scripps Institution of Oceanography, San Diego (records were not available to length of time in captivity or place of origin; photos of each are available from A. T. Howe). Coral mucus was sampled by a 10 ml syringe and concentrated by centrifugation at 10,000 g for 15 min in 1.5 ml Eppendorf tubes. Coral tissue DNA was extracted from a small 0.5 g crushed coral fragment (tissue, skeleton and mucus). DNA from all samples was extracted by the standard protocol of the PowerSoil DNA Isolation Kit (MoBio Laboratories). The V4 and its flanking regions of 18S rDNA was PCR-amplified by using different combinations of the following custom primers sets: Apicomplexa-wide primers: 346F-mix (CADCGACGGGTAACGGGGAATTA; CAGYGACGGGTAACGGGGAATTA; CAGYGACGGGTAACGGGGAATTA; CAGYGACGGGTAACGGGGAATTA) and 785R-mix (IIITATTCCATGCTGIAGTATTCA; IIITATTCCATGCTAAASTATTCA). *Colpodella angusta* group-specific primers: Ctet151 (GAATTCTAGGGCTAATACATCGC); *Alphamonas edax* group-specific primers: Cedax122 (GATGGTYRCTCACTACWTGGATAA); *Voromonas pontica* group-specific primers: Cpont123 (TGGTCACTTACTACATGGATAACCGT); Genotype N group-specific primers: GN123 (TGGCTATATTACTACATGGATAACCG); *Chromera velia*-specific primers: Chrom219 (CCAATCCATCTCTGATGGTWT); *Chromera* and *Vitrella*-specific primers: ChrRMF (TCAMGRCCYGACTTCATGGAAG). PCR products were purified using the Polyethylene glycol (PEG) protocol and cloned using StrataClone PCR Cloning Kit (Agilent) following the instructions of the manufacturer. Clones were PCR-screened using the standard M13F and M13R primers and those containing the corresponding inserts were purified using the PEG protocol and Sanger-sequenced. The total of 78 apicomplexan-related partial 18S rDNA sequences were generated following the removal of duplicates (3), chimeric or low quality sequences (3), and sequences belonging to eukaryotes other than apicomplexans (7 dinoflagellate, 7 ciliate, and 2 rhizarian-like). Among the 78 sequences, 52 branched outside established apicomplexan clades (Figure 1) and 26 branched within them (Figure S2). All sequences were deposited in GenBank under accessions KP213181-KP213258 (Table S1).

Environmental 18S rDNAs sequences were obtained from GenBank by iterative BLASTn searches using both organismal and environmental queries. Hits shorter than 350 nucleotides were removed. Alignment-based check identified several chimaeric entries which were either removed completely (GIs: 309753092, 356459426, 529105829, 529105876, 408773533, 401668321, 213058553) or where the apicomplexan-related part of the sequence was removed (GIs: 89572015, 213058464, 171199596, 355346671, 213058384, 393405443, 60476916, 118420061, 374532687). Several entries that did not well overlap well with the rest of the alignment were removed including 9 sequences from the *Vitrella brassicaformis* clade (Gis: 300088848, 300088897, 300088909, 300088918, 300088921, 300088938, 300088949, 300088950, 300088963). This resulted in 174 environmental sequences from GenBank (generated in 41 studies, 36 published and 9 unpublished; Table S1) that were

subsequently combined with the 78 sequences generated by us. The divergent ends of some sequences were trimmed upon alignment. The apicomplexan affiliation of all 252 sequences was verified in a Maximum Likelihood phylogeny (ML) using a broad representative sampling of other eukaryotes (those distantly related to alveolates were not used further). Another ML analysis was used to verify that none of the 226 was specifically related to alveolates with very fast-evolving sequences (gregarines from crustacean hosts, *Trichotokara*, *Lecudina - Veloxidinium* clade, *Paralecudina polymorpha*, *Filipodium*, *Selenidium vivax/serpulae* cf. *echinatum*, ellobiopsids; none were used further).

## 2. Culturing and transcriptome sequencing:

*Chromera velia* CCMP2878 and *Vitrella brassicaformis* CCMP3155 were cultured in the marine f/2 medium at 22°C. *Voromonas pontica* isolate G-3, *Alphamonas edax* isolate BE-2, and *Colpodella angusta* isolates Spi-2 and BE-6 were cultured on enrichments of the marine bodonid *Procryptobia sorokini* strain B-69, the freshwater heterotrophic chrysophyte *Spumella* sp. isolate OF-40, respectively, and the freshwater bodonid *Parabodo caudatus* strain BAS-1, respectively. Prey organisms were raised on the suspension of *Pseudomonas fluorescens* (strain ICISC19) in the freshwater Pratt medium or marine Schmalz-Pratt medium at room temperature (see (1) for details). Total RNA was extracted using the RNAqueous kit (Ambion). Chromerid cells were first pelleted, the medium was removed, and the cells were broken by grinding in liquid nitrogen before being resuspended in the Lysis buffer. Colpodellid cells were separated from the medium by a gentle centrifugation (1000 rpm or less) on a 0.7 micrometer filter column and subsequently resuspended in the Lysis buffer. Chromerid transcriptomes were sequenced and assembled as described in Text S1 of Keeling et al. 2014 (2) at <http://www.plosbiology.org/article/info%3Adoi%2F10.1371%2Fjournal.pbio.1001889> and the data is available at: <http://camera.crbs.ucsd.edu/mmetsp/list.php>. Total RNA from colpodellid cultures was reverse-transcribed and amplified using the SMARTer Pico PCR cDNA Synthesis Kit (Clontech). Transcriptome of *Spumella* sp. prey was prepared using the same protocol as those of colpodellids. Transcriptomes were generated by Illumina HiSeq sequencing (100bp paired-end reads; multiplexing 0.25 lane per each of the four samples) producing the following number of raw reads (forward+reverse) 177,414,112 raw reads (*A. edax* BE-2); 50,933,148 (*V. pontica* G-3), 42,068,699 raw reads (*C. angusta* Spi-2), and 53,155,624 raw reads (*C. angusta* BE-6). Cutadapt 1.2.1 was used to trim SMARTer adaptors and 3' Illumina sequencing adaptor (in short fragments). Trimmed reads were assembled in Inchworm (Trinity r2012-06-08) using the default settings (K25 L25) and the minimum contig length of 150 nucleotides. Contamination by *Spumella* prey sequence in *A. edax* transcriptome and cross-contamination between colpodellid transcriptomes (a likely consequence of sequencing all samples in a single lane) was removed by using a custom script as follows: for any two contigs that were  $\geq 95\%$  similar between two samples, contig kmer coverages (produced by Inchworm) were compared; if  $\geq 50$  times difference in coverage was found then the low-coverage contig was discarded as a probable contaminant, otherwise both contigs were discarded. Contigs highly similar (95% or more) to known bacterial sequences were also removed by using a custom script, however, many bacterial contaminants were retained due to the lack of reference sequences. Purified contigs from the four colpodellid transcriptomes were deposited in GenBank Sequence Read Archive. Contigs of the two *C. angusta* strains (Spi-2 and BE-6) were pooled in further analysis after being found to be nearly identical at the nucleotide level (differences if present were typically limited to non-coding terminal regions). *Chromera velia* and *Voromonas pontica* contigs were pooled with those generated in independent studies (3, 4). Open reading frames (ORFs) were six-frame translated into amino acids using GetORF (EMBOSS). DNA surveys from *A. edax* and

*C. angusta* cells were prepared by Epicentre DNA extraction kit, followed by sequencing and assembly as above.

### 3. Analysis of plastid dependency:

In order to study distribution of diverse characteristics in apicomplexans and relatives, a custom BLAST database was built. This included protein sequences predicted from the 5 chrompodellid transcriptomes, 11 apicomplexan genomes (*Babesia bovis* T2Bo, *Babesia microti* RI, *Cryptosporidium muris* RN66, *Cryptosporidium parvum* Iowa II, *Eimeria maxima*, *Eimeria tenella* Houghton, *Neospora caninum* LIV, *Plasmodium berghei* ANKA, *Plasmodium falciparum* 3D7, *Plasmodium vivax* SaI1, *Theileria annulata* Ankara, *Theileria parva* Muguga, *Toxoplasma gondii* ME49), the small-scale genome sequence survey of *Ascogregarina taiwanensis*, the unpublished genome draft from *Gregarina niphandrodes*, 11 dinoflagellate transcriptomes (*Alexandrium catenella*, *A. minutum*, *A. ostenfeldii*, *A. tamarense*, *Amphidinium carterae*, *Heterocapsa triquetra*, *Karenia brevis*, *Karlodinium micrum*, *Lingulodinium polyedrum*, *Oxyrrhis marina*, *Symbiodinium* sp. kb8), the unpublished draft genome of *Perkinsus marinus* ATCC50983 and the draft genome of the dinoflagellate *Symbiodinium minutum*, and 53 genomes from representative eukaryotes (*Acanthamoeba castellanii* Neff, *Albugo laibachii* Nc14, *Allomyces macrogynus* ATCC 38327, *Aplanochytrium kerguelense* PBS07, *Arabidopsis thaliana*, *Aspergillus fumigatus* A1163, *Aureococcus anophagefferens* CCMP1984, *Bathycoccus prasinus* RCC1105, *Bigelowiella natans* CCMP2755, *Blastocystis hominis*, *Calliarthron tuberculosum*, *Capsaspora owczarzakii* ATCC30864, *Chlamydomonas reinhardtii*, *Chlorella variabilis* NC64A, *Chlorokybus atmophyticus* UTEX2591, *Chondrus crispus* PCG, *Coccomyxa subellipsoidea* C169, *Cyanidioschyzon merolae* 10D, *Cyanophora paradoxa*, *Dictyostelium discoideum* AX4, *Ectocarpus siliculosus* Ec32, *Emiliana huxleyi* CCMP1516, *Entamoeba dispar*, *Euglena gracilis*, *Galdieria sulphuraria*, *Giardia intestinalis*, *Glaucocystis nostochinearum*, *Guillardia theta* CCMP2712, *Ichthyophthirius multifiliis*, *Leishmania major* Friedlin, *Mesostigma viride*, *Micromonas* sp. RCC299, *Monosiga brevicollis* MX1, *Naegleria gruberi* NEG-M, *Nannochloropsis gaditana* CCMP526, *Ostreococcus* sp. RCC809, *Paramecium tetraurelia*, *Phaeodactylum tricornutum* CCAP1055-1, *Physcomitrella patens patens*, *Porphyridium purpureum*, *Pyropia yezoensis*, *Pythium ultimum* BR144, *Rhizopus oryzae*, *Saprolegnia parasitica* ATCC90214, *Spizelomyces punctatus* DAOM BR117, *Sterkiella histriomuscorum*, *Tetrahymena thermophila*, *Thalassiosira pseudonana* CCMP1335, *Thecamonas trahens* ATCC50062, *Trichomonas vaginalis*, *Trichoplax adhaerens* Grell-BS-1999, *Trypanosoma brucei gambiense*, *Ustilago maydis*). Homologs to eukaryotic queries were retrieved based on BLASTp searches with a variable cutoff. Prokaryotic homologs were retrieved from a custom database (5-10 representatives per phylum) and GenBank (additional sequences most closely related to apicomplexan or chrompodellid queries). Plastid targeting signals were analysed in selected plastid proteins with complete N-termini. Proteins that screened positively for signal peptides in SignalP 4.1 were further tested for the presence of transit peptides in ChloroP 1.1 and listed in Table S3.

### 4. Analysis of the distribution of apicomplexan-specific proteins:

a) 21 bacterial genes predicted to have been acquired in the apicomplexan ancestor (Fig. 4A) were identified from published literature and during preliminary analyses in this study (Table S5). Out of the 23 bacterial transfers previously identified in *Cryptosporidium* ((5); malate and lactate dehydrogenase represent the same HGT event), 12 were examined here (Table S5). The remaining 11 were either specific to *Cryptosporidium* (EAK89684.1,

AAU15128.1, EAK88388.1, EAK88222.1, AAS47699.1, EAK87293.1, AAL83208.1, EAK87294.1, EAK89739.1, EAK89015.1) or excluded because of the divergent character of the sequences (acetyltransferase, EAK87438.1; a homolog was identified in *Alphamonas*, however, suggesting that neither this gene represents an apicomplexan-specific HGT). Retrieval of eukaryotic and bacterial sequences was done as described above. Alignments, removal of variable sites, RAxML, and PhyML phylogenies were done as described in Materials and Methods (in final alignments shorter than 150 amino acids only aLRT supports were calculated; Fig. S5). Results were summarized in Table S5 and Fig. S5.

b-d) 185 OrthoMCL clusters (OG5 edition; (6)) were downloaded from <http://www.orthomcl.org>. 527 Apiloc proteins (representing 382 OrthoMCL clusters) were downloaded from <http://apiloc.biochem.unimelb.edu.au/apiloc>. 173 Wasmuth et al. clusters were downloaded from the Supplement of the paper (7). A query representing each cluster or Apiloc protein (most frequently the sequence from *Toxoplasma gondii*) was then used to search homologs in our eukaryotic database using BLASTp searches, as described in Materials and Methods. All hits were evaluated by eye to prevent misassignment owing to the presence of repeats and amino acid bias both of which are common in secreted proteins. Proteins that contained any regions or domains with significant hits ( $<1e-5$  evaluate similarity) to eukaryotes other than apicomplexans or other myzozoans were removed from further searches as 'eukaryotic' (all control proteins localized to Golgi belonged here). Proteins that were limited to certain apicomplexan subgroups only were likewise removed (many Apiloc proteins; Table S5). These strict homology assignments identified 102 protein cluster candidates that appeared to have originated during early apicomplexan or myzozoan evolution. Further in-depth similarity searches by using these proteins as queries and even stricter criteria (all hits  $1e-3$  to  $1e-5$  were thoroughly evaluated) led to removal of some of the candidates and produced the final count of 74 protein clusters that appeared specific to either apicomplexans ( $n=19$ ), apicomplexans and chrompodelids ( $n=29$ ), or all myzozoans ( $n=26$ ). Alveolins and oocyst wall proteins (OWPs) clusters identified through this process did not share significant similarity to other eukaryotes, however, they belonged to larger families, and some members of these families shared sequence similarity with ciliates (8), and fungi/insects/bacteria (9), respectively. In the case of alveolins, the pattern is consistent with the origin in early alveolates followed by diversification prior to myzozoan divergence (Fig. 4B). In the case of OWPs, the similarity may result from convergent evolution on the same function (9). The distribution of additional proteins (e.g., MyoA, subtilisin proteases, ribonucleotide reductase, proteins lost in apicomplexans) was determined in an analogous fashion and their phylogenies were done as described in Materials and Methods.

## SI References:

1. Tikhonenkov DV, et al. (2014) Description of *Colponema vietnamica* sp.n. and *Acavomonas peruviana* n. gen. n. sp., Two New Alveolate Phyla (*Colponemidia* nom. nov. and *Acavomonidia* nom. nov.) and Their Contributions to Reconstructing the Ancestral State of Alveolates and Eukaryotes. *PLoS ONE* 9(4):e95467.
2. Keeling PJ, et al. (2014) The Marine Microbial Eukaryote Transcriptome Sequencing Project (MMETSP): illuminating the functional diversity of eukaryotic life in the oceans through transcriptome sequencing. *PLoS Biol* 12(6):e1001889.

3. Gile GH, Slamovits CH (2014) Transcriptomic Analysis Reveals Evidence for a Cryptic Plastid in the Colpodellid *Voromonas pontica*, a Close Relative of Chromerids and Apicomplexan Parasites. *PLoS ONE* 9(5):e96258.
4. Woehle C, Dagan T, Martin WF, Gould SB (2011) Red and problematic green phylogenetic signals among thousands of nuclear genes from the photosynthetic and apicomplexa-related *Chromera velia*. *Genome Biol Evol* 3(Botanik III):1220–30.
5. Huang J, et al. (2004) Phylogenomic evidence supports past endosymbiosis, intracellular and horizontal gene transfer in *Cryptosporidium parvum*. *Genome Biol* 5(11):R88–R88.
6. Chen F (2006) OrthoMCL-DB: querying a comprehensive multi-species collection of ortholog groups. *Nucleic Acids Res* 34(90001):D363–D368.
7. Wasmuth J, Daub J, Peregrin-Alvarez JM, Finney CAM, Parkinson J (2009) The origins of apicomplexan sequence innovation. *Genome Res* 19:1202–1213.
8. Gould SB, Tham W-H, Cowman AF, McFadden GI, Waller RF (2008) Alveolins, a new family of cortical proteins that define the protist infrakingdom Alveolata. *Mol Biol Evol* 25(6):1219–30.
9. Templeton TJ, et al. (2004) The *Cryptosporidium* Oocyst Wall Protein Is a Member of a Multigene Family and Has a Homolog in *Toxoplasma*. *Infect Immun* 72(2):980–987.
10. Seow F, et al. (2005) The plastidic DNA replication enzyme complex of *Plasmodium falciparum*. *Mol Biochem Parasitol* 141(2):145–153.
11. Sato S, Wilson RJM (2003) Proteobacteria-like ferrochelatase in the malaria parasite. *Curr Genet* 42(5):292–300.
12. Madern D, Cai X, Abrahamsen MS, Zhu G (2003) Evolution of *Cryptosporidium parvum* Lactate Dehydrogenase from Malate Dehydrogenase by a Very Recent Event of Gene Duplication. *Mol Biol Evol* 21(3):489–497.
13. Kicska GA, et al. (2002) Transition State Analogue Inhibitors of Purine Nucleoside Phosphorylase from *Plasmodium falciparum*. *J Biol Chem* 277(5):3219–3225.
14. Huang J, Mullapudi N, Sicheritz-Ponten T, Kissinger JC (2004) A first glimpse into the pattern and scale of gene transfer in Apicomplexa. *Int J Parasitol* 34(3):265–74.
15. Hu G, et al. (2010) Transcriptional profiling of growth perturbations of the human malaria parasite *Plasmodium falciparum*. *Nat Biotechnol* 28(1):91–98.
16. Proellocks NI, et al. (2009) Characterisation of PfRON6, a *Plasmodium falciparum* rhoptry neck protein with a novel cysteine-rich domain. *Int J Parasitol* 39(6):683–692.
17. Bradley PJ, et al. (2005) Proteomic analysis of rhoptry organelles reveals many novel constituents for host-parasite interactions in *Toxoplasma gondii*. *J Biol Chem* 280(40):34245–58.
18. Tufet-Bayona M, et al. (2009) Localisation and timing of expression of putative *Plasmodium berghei* rhoptry proteins in merozoites and sporozoites. *Mol Biochem Parasitol* 166(1):22–31.

19. Van Ooij C, et al. (2008) The Malaria Secretome: From Algorithms to Essential Function in Blood Stage Infection. *PLoS Pathog* 4(6):e1000084.
20. Lamarque MH, et al. (2012) Identification of a New Rhoptry Neck Complex RON9/RON10 in the Apicomplexa Parasite *Toxoplasma gondii*. *PLoS ONE* 7(3):e32457.
21. Bullen HE, et al. (2009) A Novel Family of Apicomplexan Glideosome-associated Proteins with an Inner Membrane-anchoring Role. *J Biol Chem* 284(37):25353–25363.
22. Possenti A, et al. (2010) Molecular characterisation of a novel family of cysteine-rich proteins of *Toxoplasma gondii* and ultrastructural evidence of oocyst wall localisation. *Int J Parasitol* 40(14):1639–1649.
23. Schneider I, et al. (2007) Identification, molecular characterization and subcellular localization of a *Theileria annulata* parasite protein secreted into the host cell cytoplasm. *Parasitol Res* 101(6):1471–1482.
24. Schneider I, Haller D, Seitzer U, Beyer D, Ahmed JS (2004) Molecular genetic characterization and subcellular localization of a putative *Theileria annulata* membrane protein. *Parasitol Res* 94(6):405–415.
25. Beck JR, et al. (2010) A Novel Family of *Toxoplasma* IMC Proteins Displays a Hierarchical Organization and Functions in Coordinating Parasite Division. *PLoS Pathog* 6(9):e1001094.
26. Tremp AZ, Khater EI, Dessens JT (2008) IMC1b Is a Putative Membrane Skeleton Protein Involved in Cell Shape, Mechanical Strength, Motility, and Infectivity of Malaria Ookinetes. *J Biol Chem* 283(41):27604–27611.

## SI Figure Legends:

**Figure S1:** Phylogeny of the reference 18S rDNA alignment. Maximum likelihood phylogeny (RAxML; GTR+GAMMA+4 model) of 109 eukaryotic 18S rDNA sequences with sequence gi accessions after the @ symbol. Branch support values correspond to 300 non-parametric bootstraps. Supports  $\geq 60$  are shown. Full black circles correspond to complete support (100%).

**Figure S2:** Phylogeny of environmental sequences generated in this study that cluster with known apicomplexan clades. Maximum likelihood phylogeny (RAxML; GTR+GAMMA+4 model) of eukaryotic and environmental 18S rDNA sequences with non-parametric bootstrap supports (300 replicates) and environment types listed according to the key. Supports  $\geq 60$  are shown. Full black circles correspond to complete support (100%). Sequence accessions (gi) are specified following the @ sign.

**Figure S3:** SufB phylogeny. Maximum likelihood phylogeny (RAxML; LG+GAMMA+4 model) with non-parametric bootstraps (300 replicates) / PhyML aLRT supports at relevant nodes. Upper values correspond to the dataset shown, lower values correspond to dataset with fast-evolving sequences excluded (*Vitrella* and *Colpodella*, indicated by asterisks). The position of apicomplexan plastid-encoded SufB was established in a separate analysis and is shown by

a dashed line.

**Figure S4:** ClpC phylogeny. Maximum likelihood phylogeny of ClpC and the closest ClpB paralogs (RAxML; LG+GAMMA+4 model) with PhyML aLRT supports at relevant nodes. First values correspond to the dataset shown, second values correspond to dataset with fast-evolving sequences excluded (*Chromera* and apicomplexans, indicated by asterisks).

**Figure S5:** Phylogenies of 13 bacterial proteins in apicomplexans and relatives. Maximum likelihood phylogeny (RAxML; LG+GAMMA+4 model) with non-parametric bootstraps (300 replicates) / PhyML aLRT supports at relevant nodes (datasets shorter than 150 amino acid positions were not bootstrapped). Predicted horizontal gene transfer (HGT) events are highlighted.

**Figure S6:** Phylogeny of ribonucleotide reductase. Maximum likelihood phylogeny (RAxML; LG+GAMMA+4 model) reveals that the R2e2 type (previously thought to be unique to apicomplexans and not closely related to the R2e1 type) is also found in chrompodellids and originated by lineage-specific duplication from the R2e1 type.

**Figure S7:** Phylogeny of subtilisin proteases. Maximum likelihood phylogeny (RAxML; LG+GAMMA+4 model) shows that the majority of apicomplexan subtilisin proteases (e.g. SUB1-12 in *Toxoplasma*) share an ortholog in chrompodellids (or other myzozoans).

**Table S1:** Environmental sequences related to apicomplexans that were used in this study.

**Table S2:** Abbreviations and full names of proteins and pathways used in Fig. 3.

**Table S3:** Chrompodellid plastidic proteins with complete N-terminal sequence.

**Table S4:** Classification of 527 proteins from Apiloc (corresponding to 382 OrthoMCL clusters) based on their putative origin.

**Table S5:** Classification of 21 bacterial genes in apicomplexans and relatives acquired by horizontal gene transfer (HGT).

**Table S6:** Classification of 74 unique proteins specific to apicomplexans, apicomplexans and chrompodellids, and myzozoans.

**Table S7:** Domain superfamilies in chrompodellid and dinoflagellate PKSII/FASII proteins identified by NCBI Conserved Domains searches.

Figure S1: Phylogeny of the reference 18S rDNA alignment.

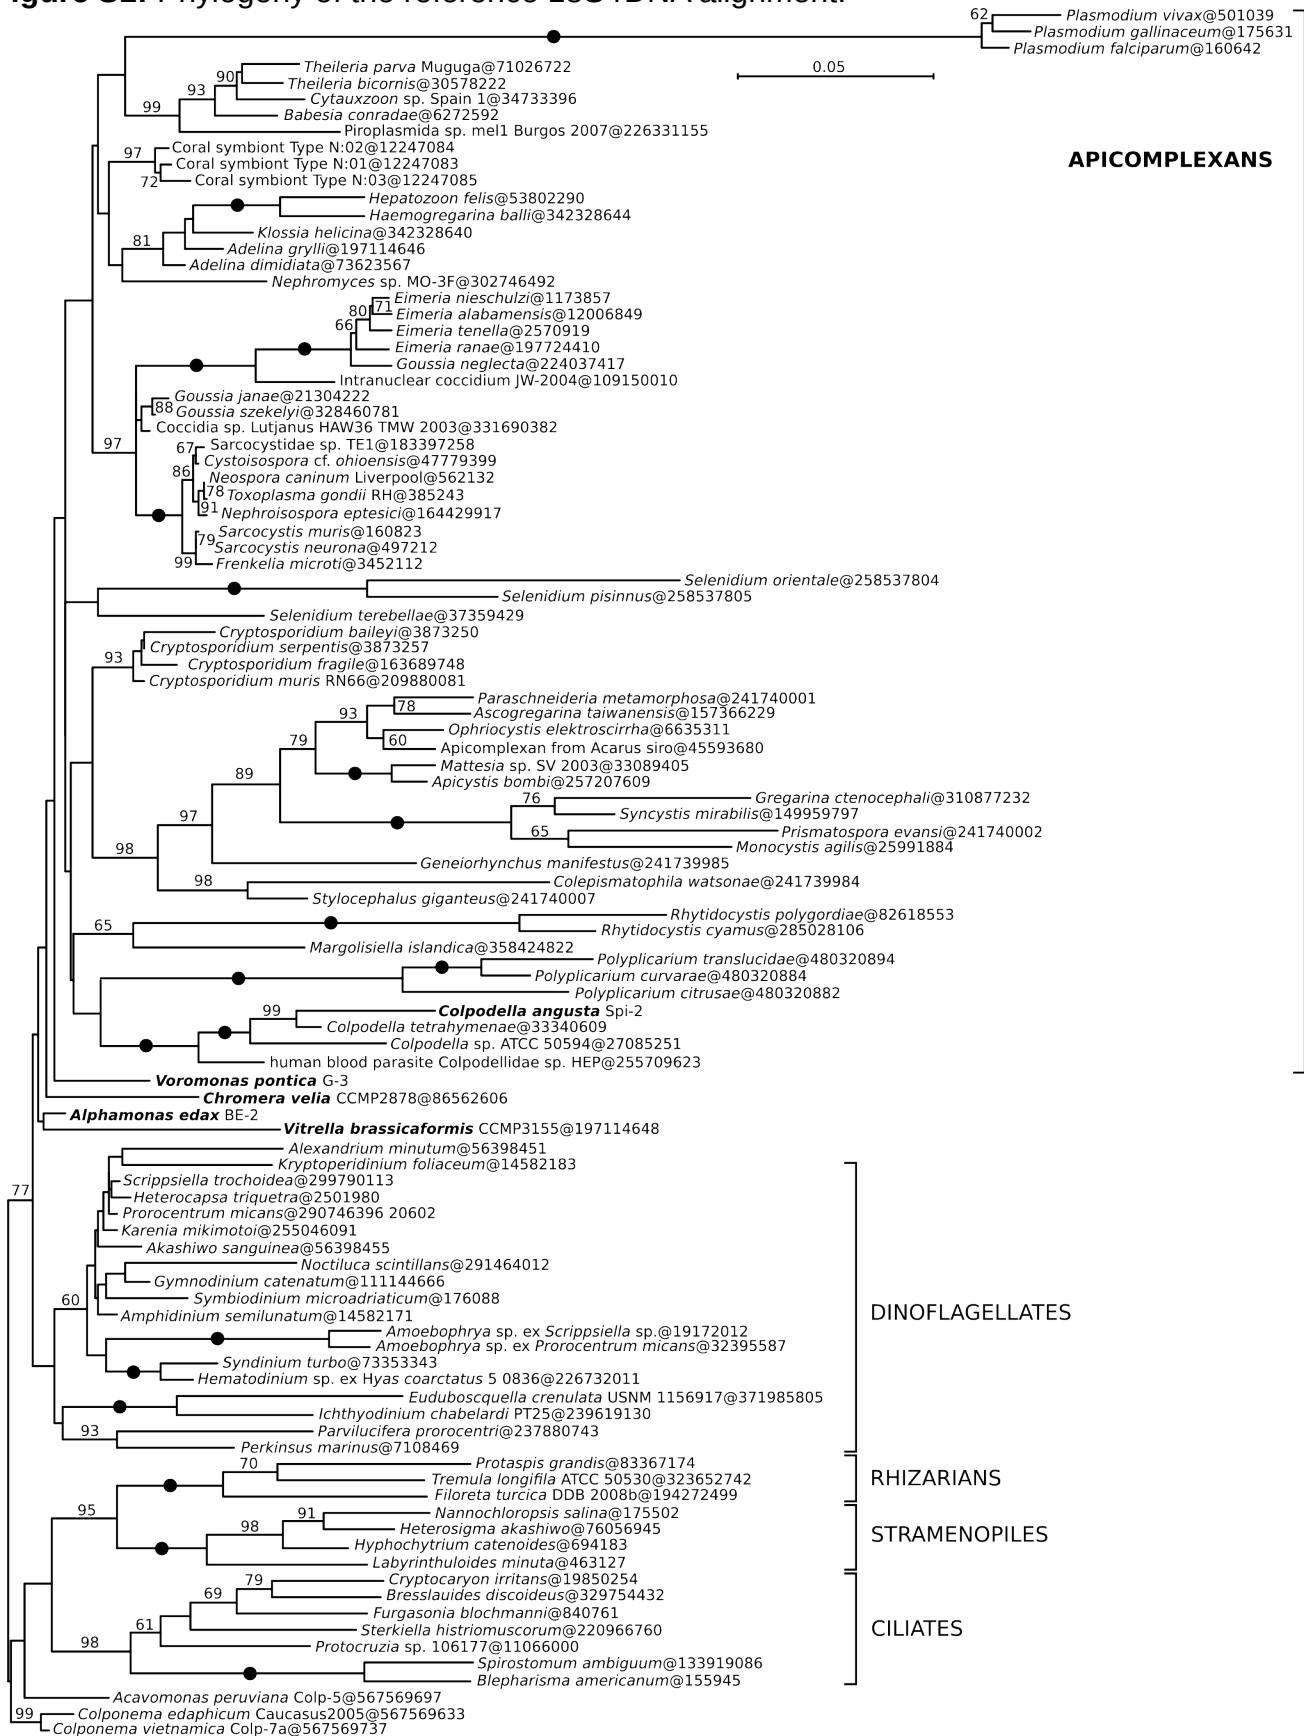



**Figure S2: Phylogeny of environmental sequences generated in this study that cluster with known apicomplexan clades.**

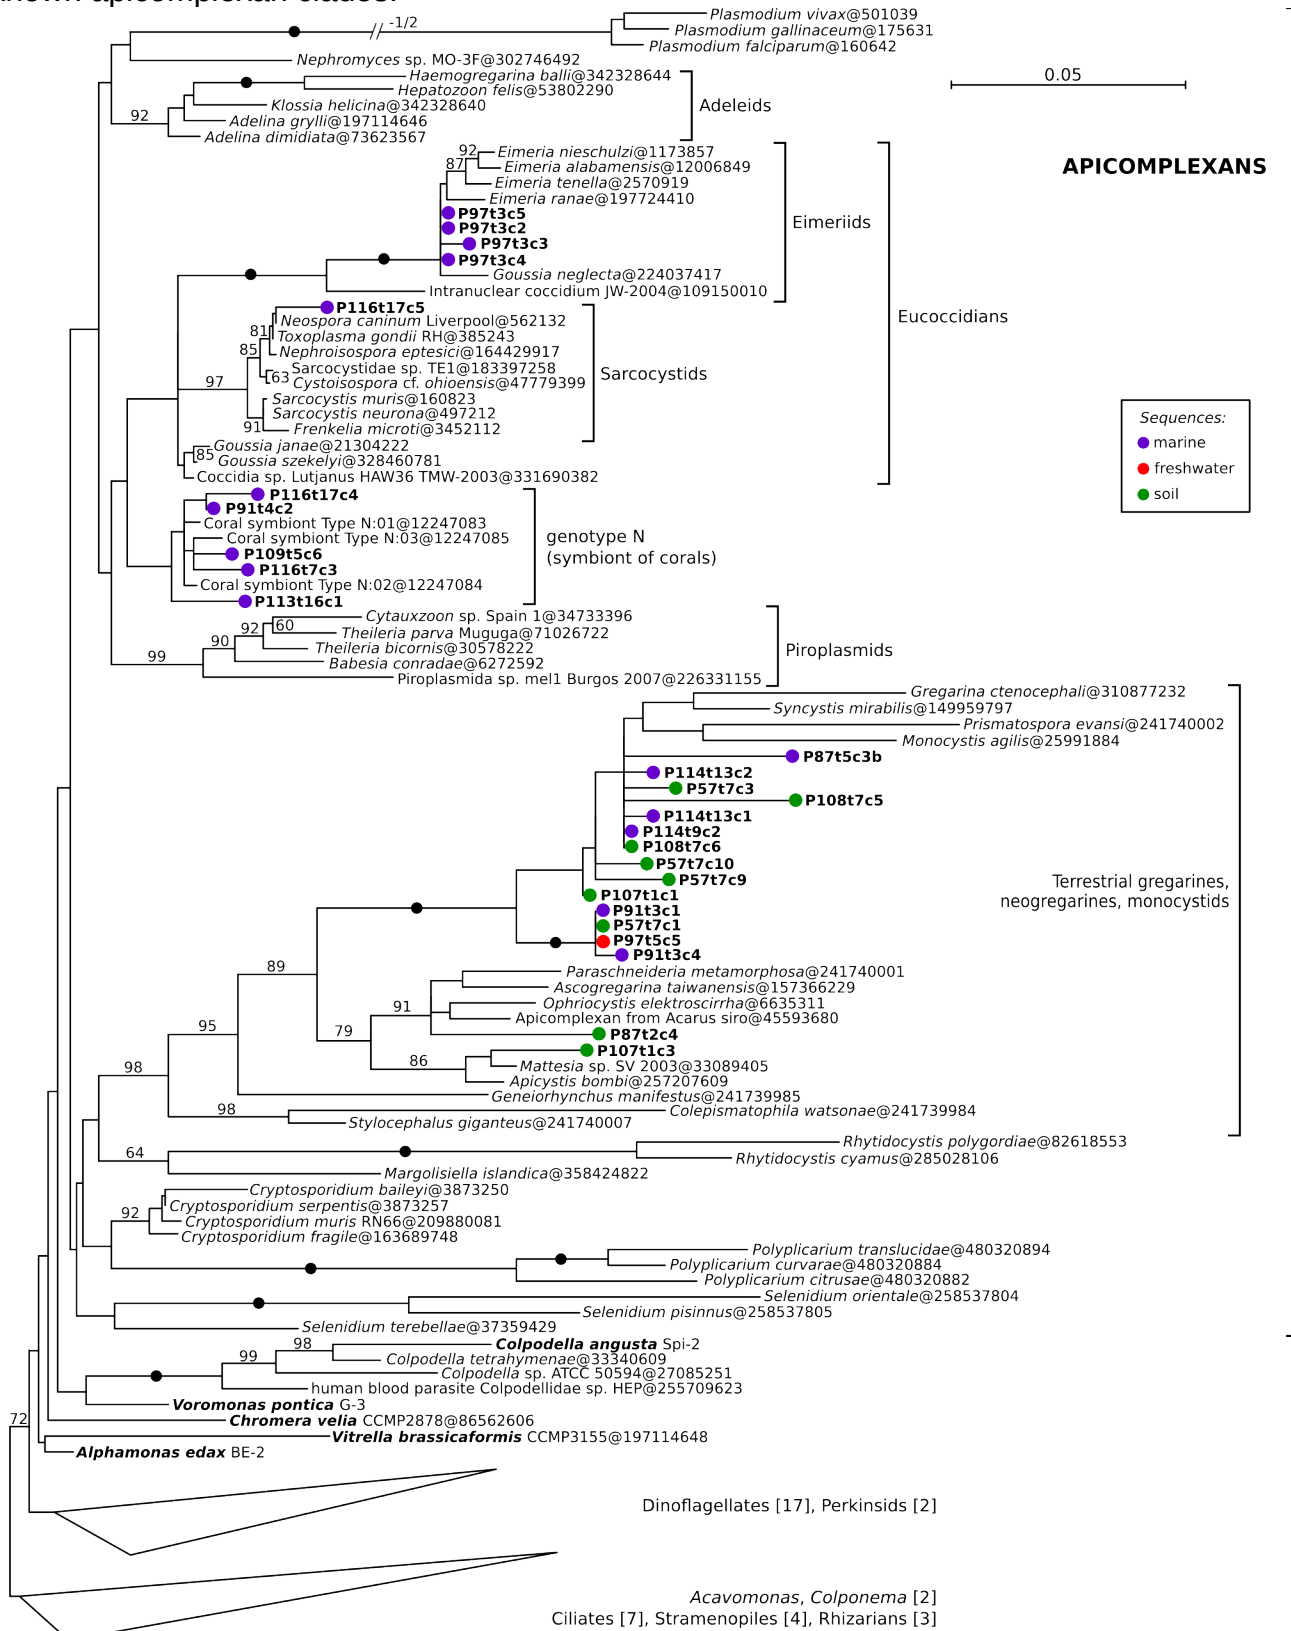



Figure S4: ClpC phylogeny.

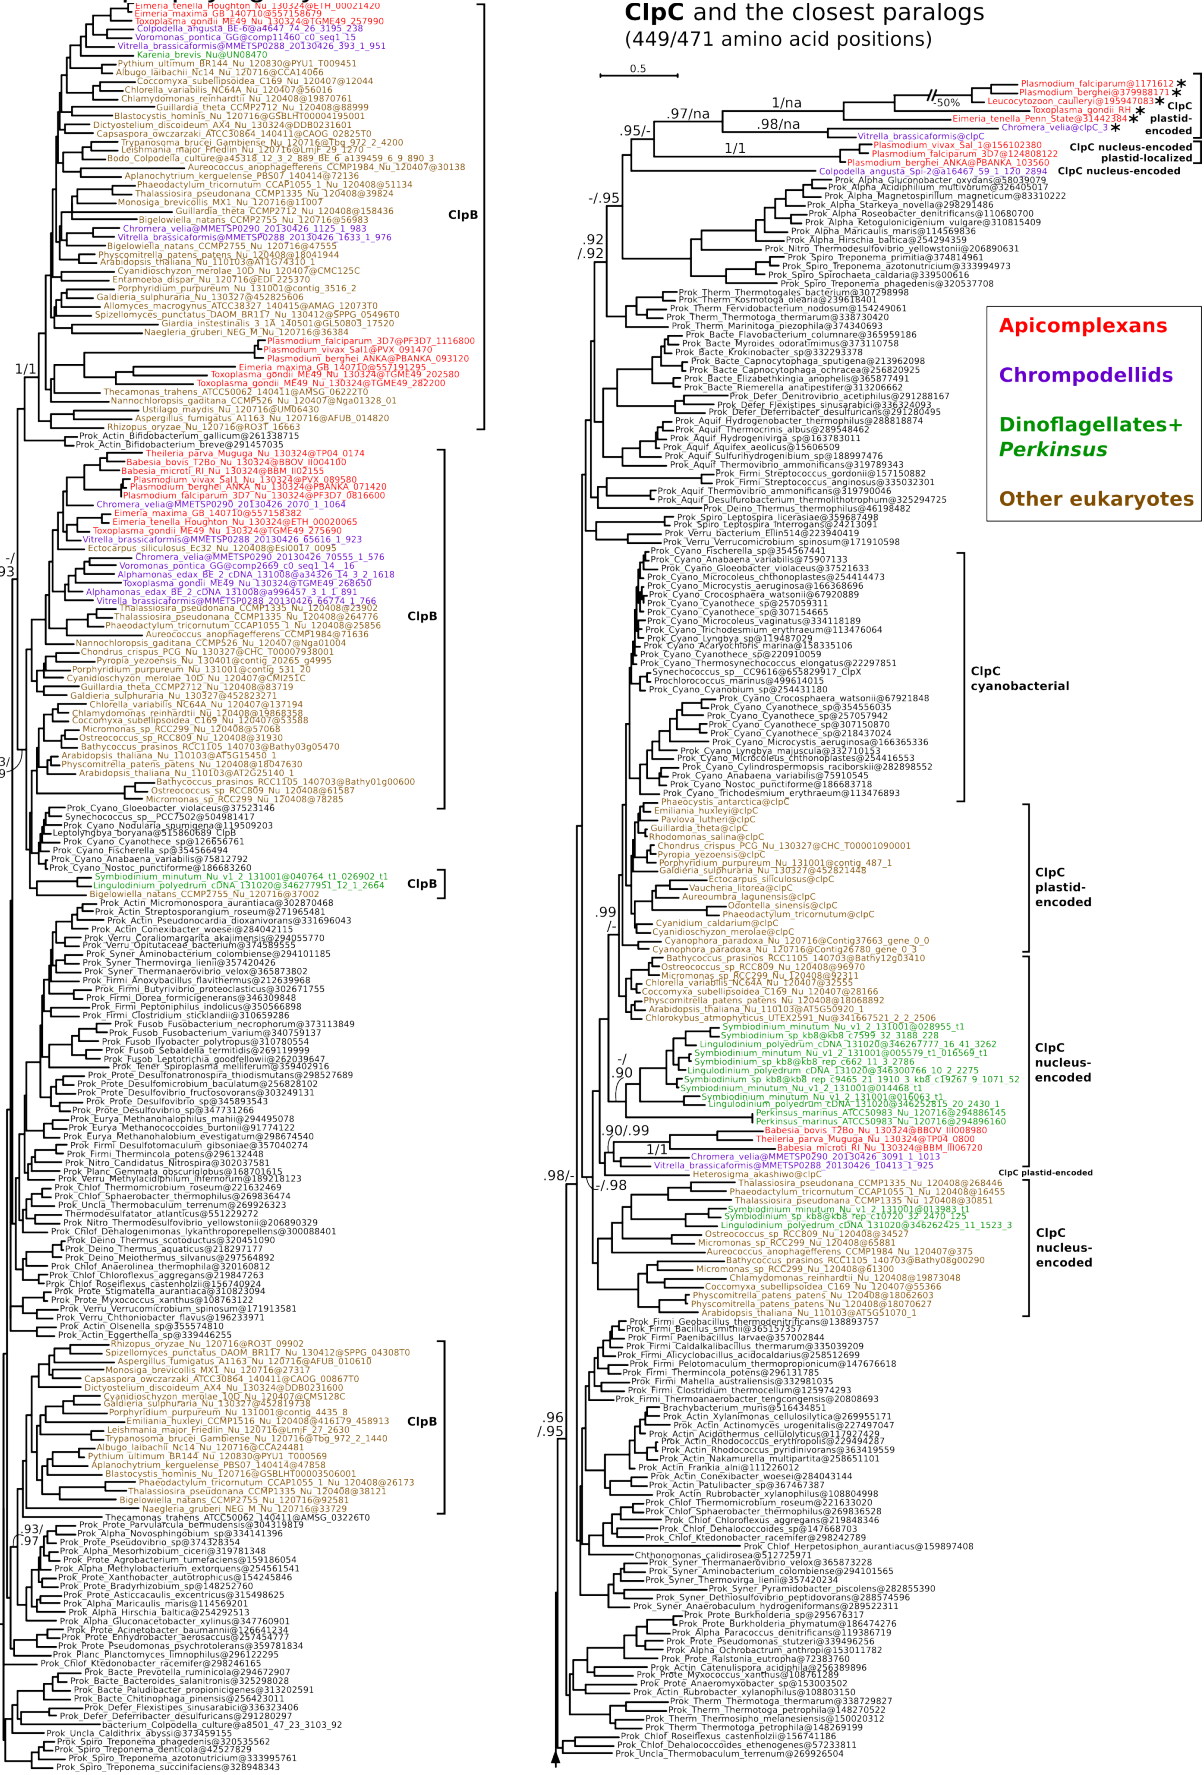

**Figure S5: Phylogenies of 13 bacterial proteins in apicomplexans and relatives.**

**DUT; desoxyuridine 5-triophosphate nucleotidohydrilase**  
(119 amino acid positions)

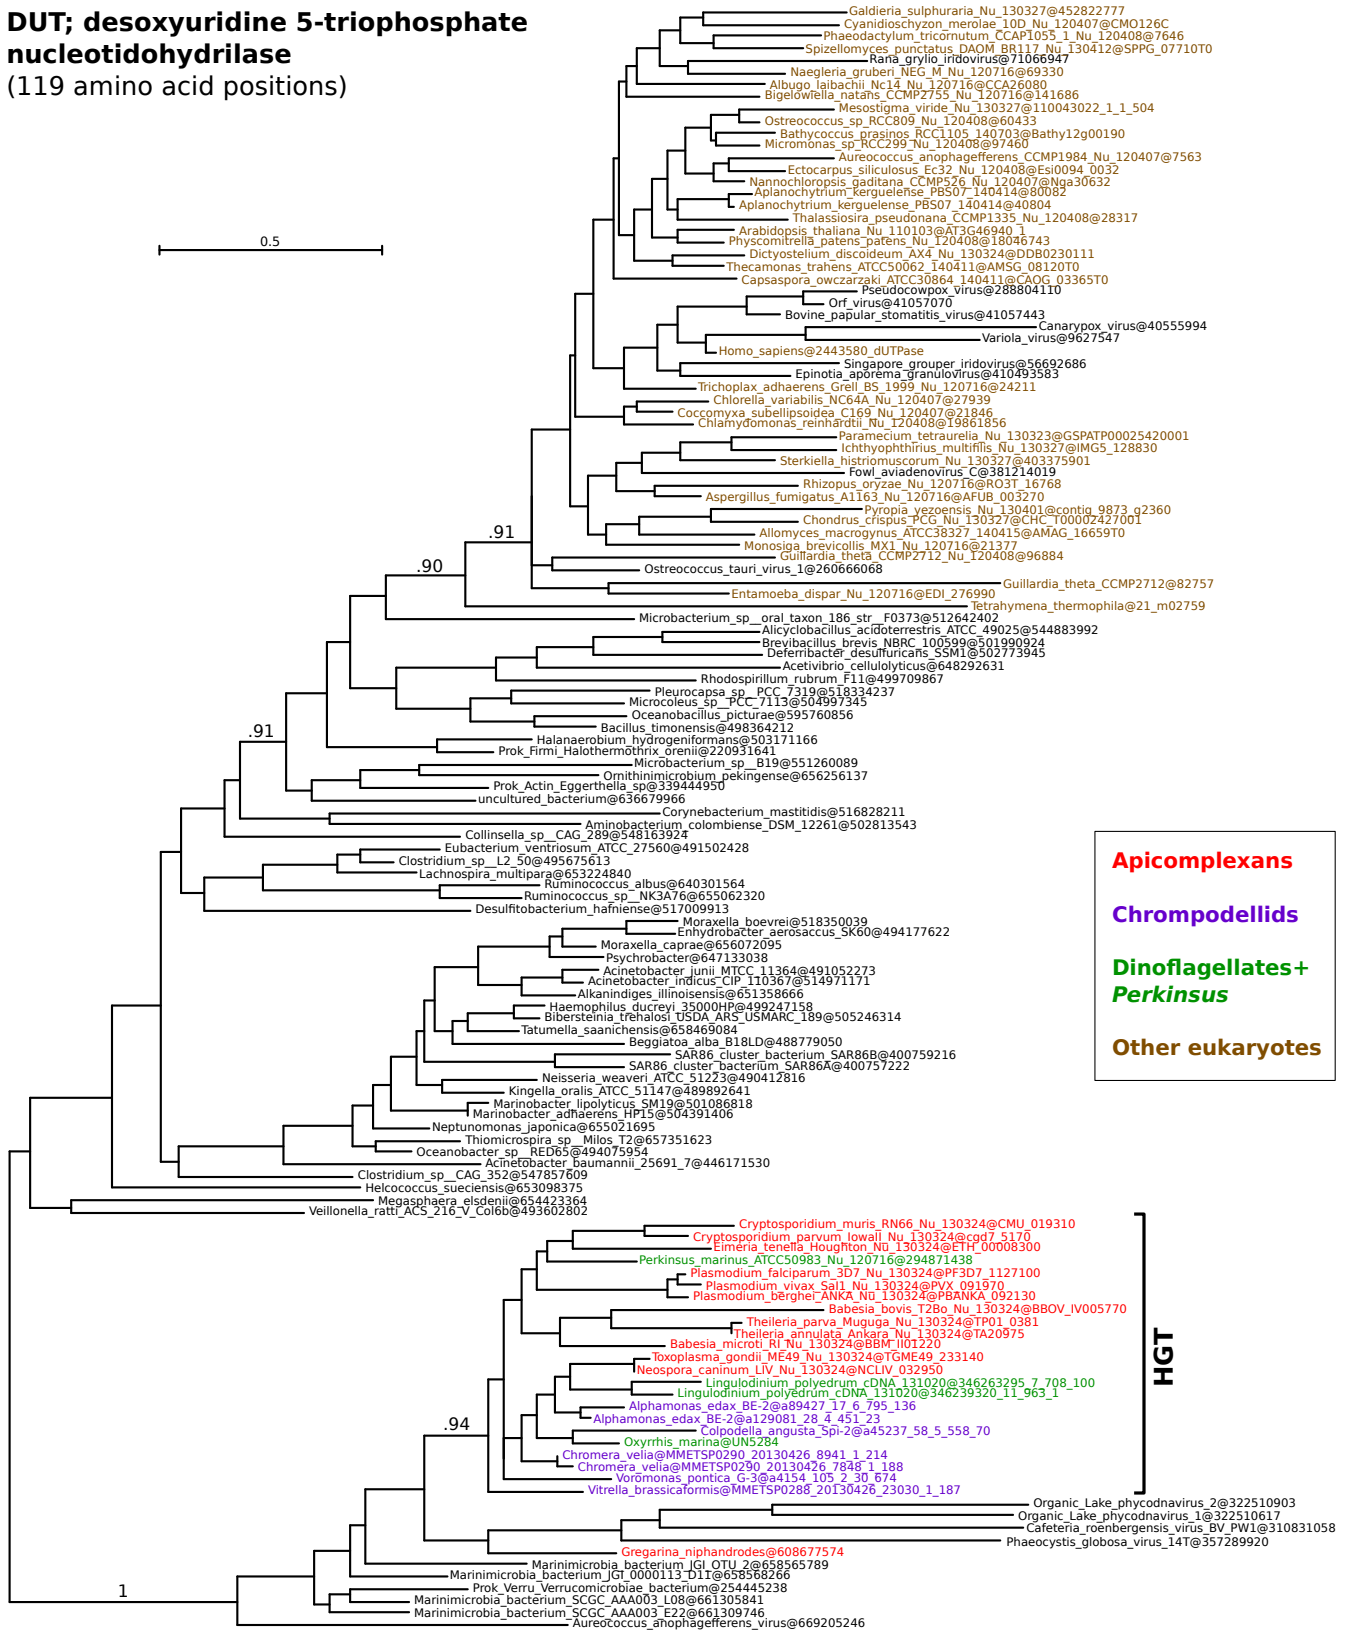

**FabG; 3-oxoacyl-ACP reductase (plastidic)**  
(216 amino acid positions)

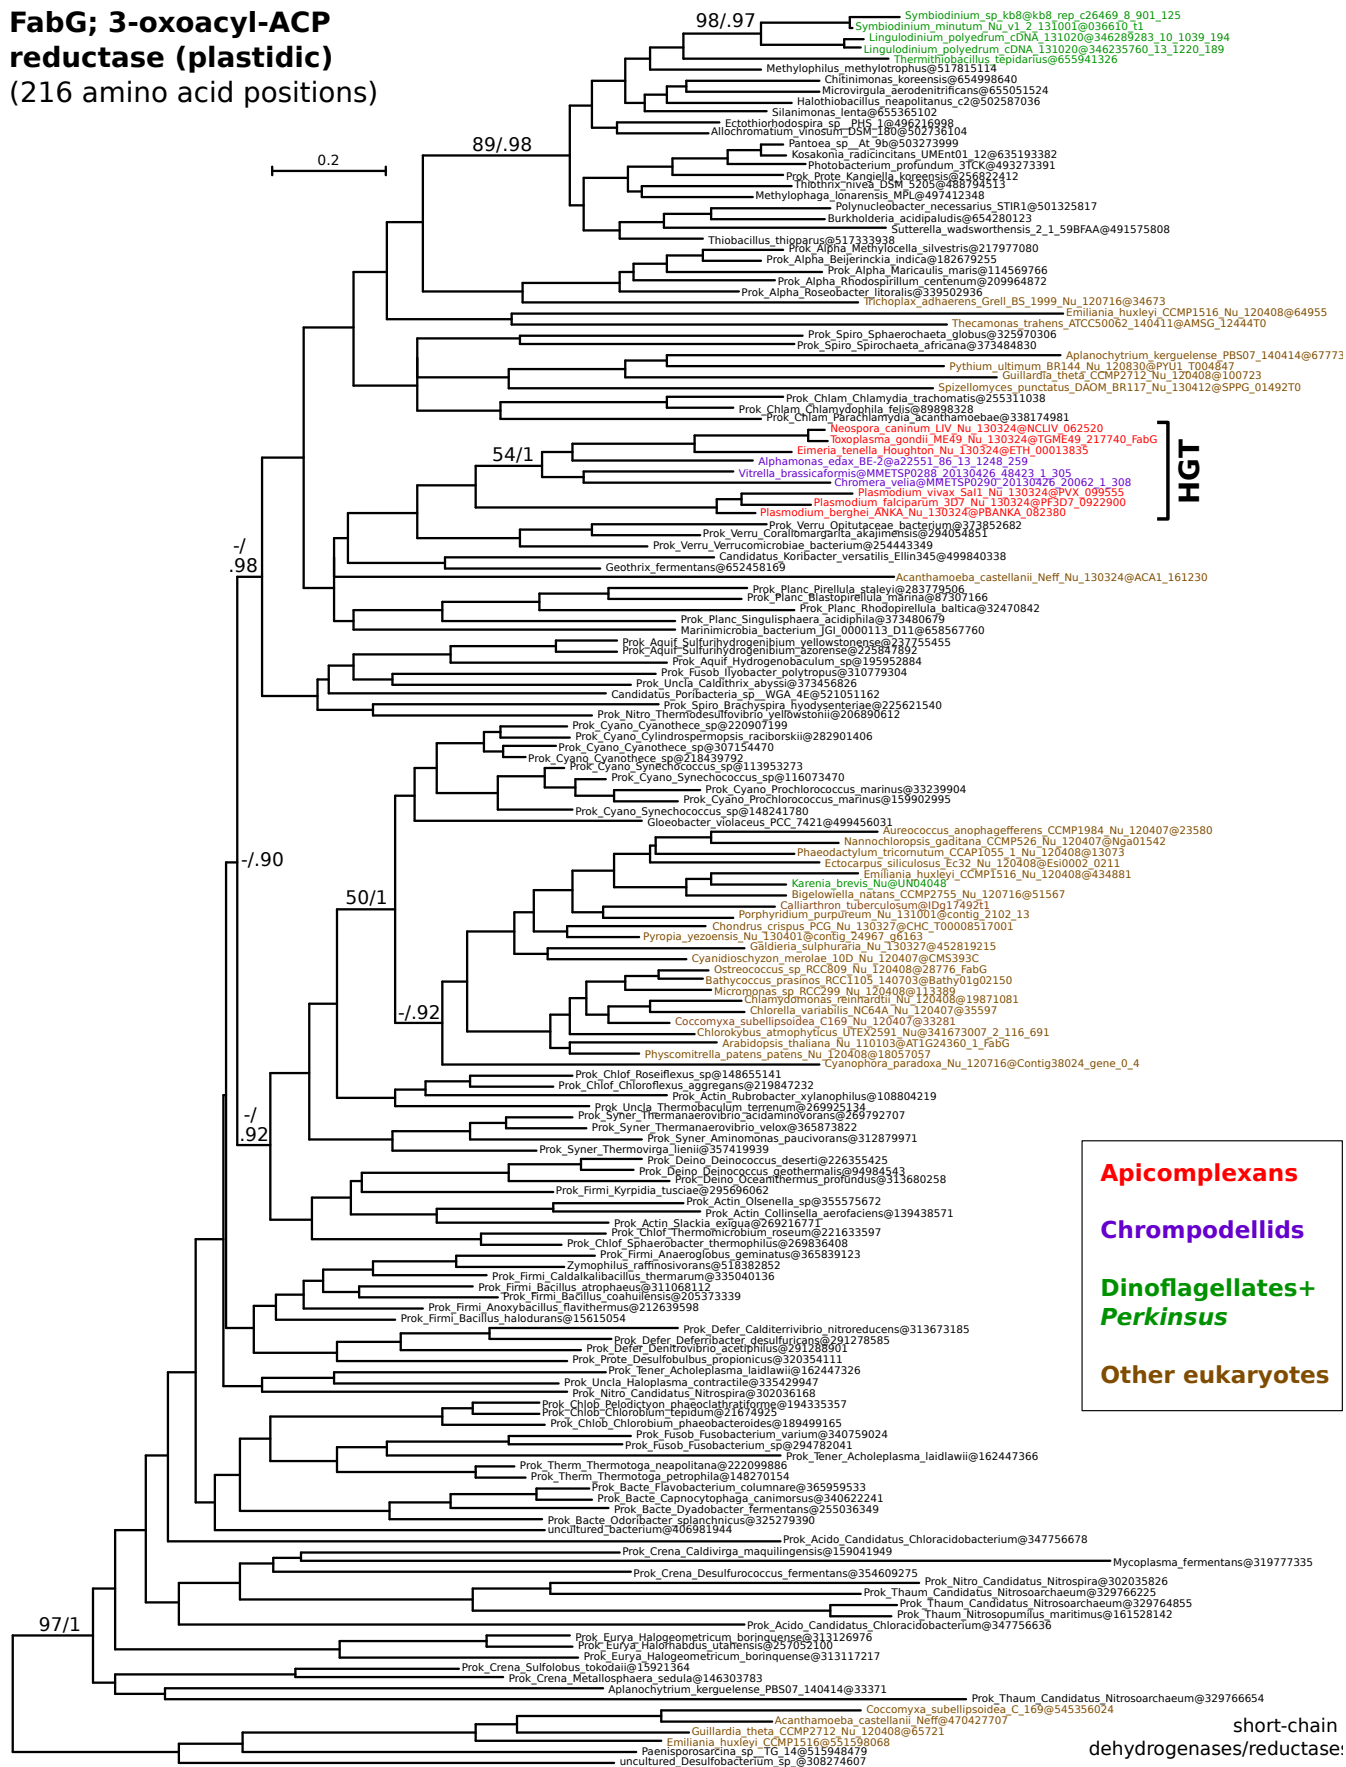

**Apicomplexans**  
**Chromodellids**  
**Dinoflagellates+ Perkinsus**  
**Other eukaryotes**

short-chain dehydrogenases/reductase:

**Fbp; fructose-1,6-bisphosphatase**  
(253 amino acid positions)

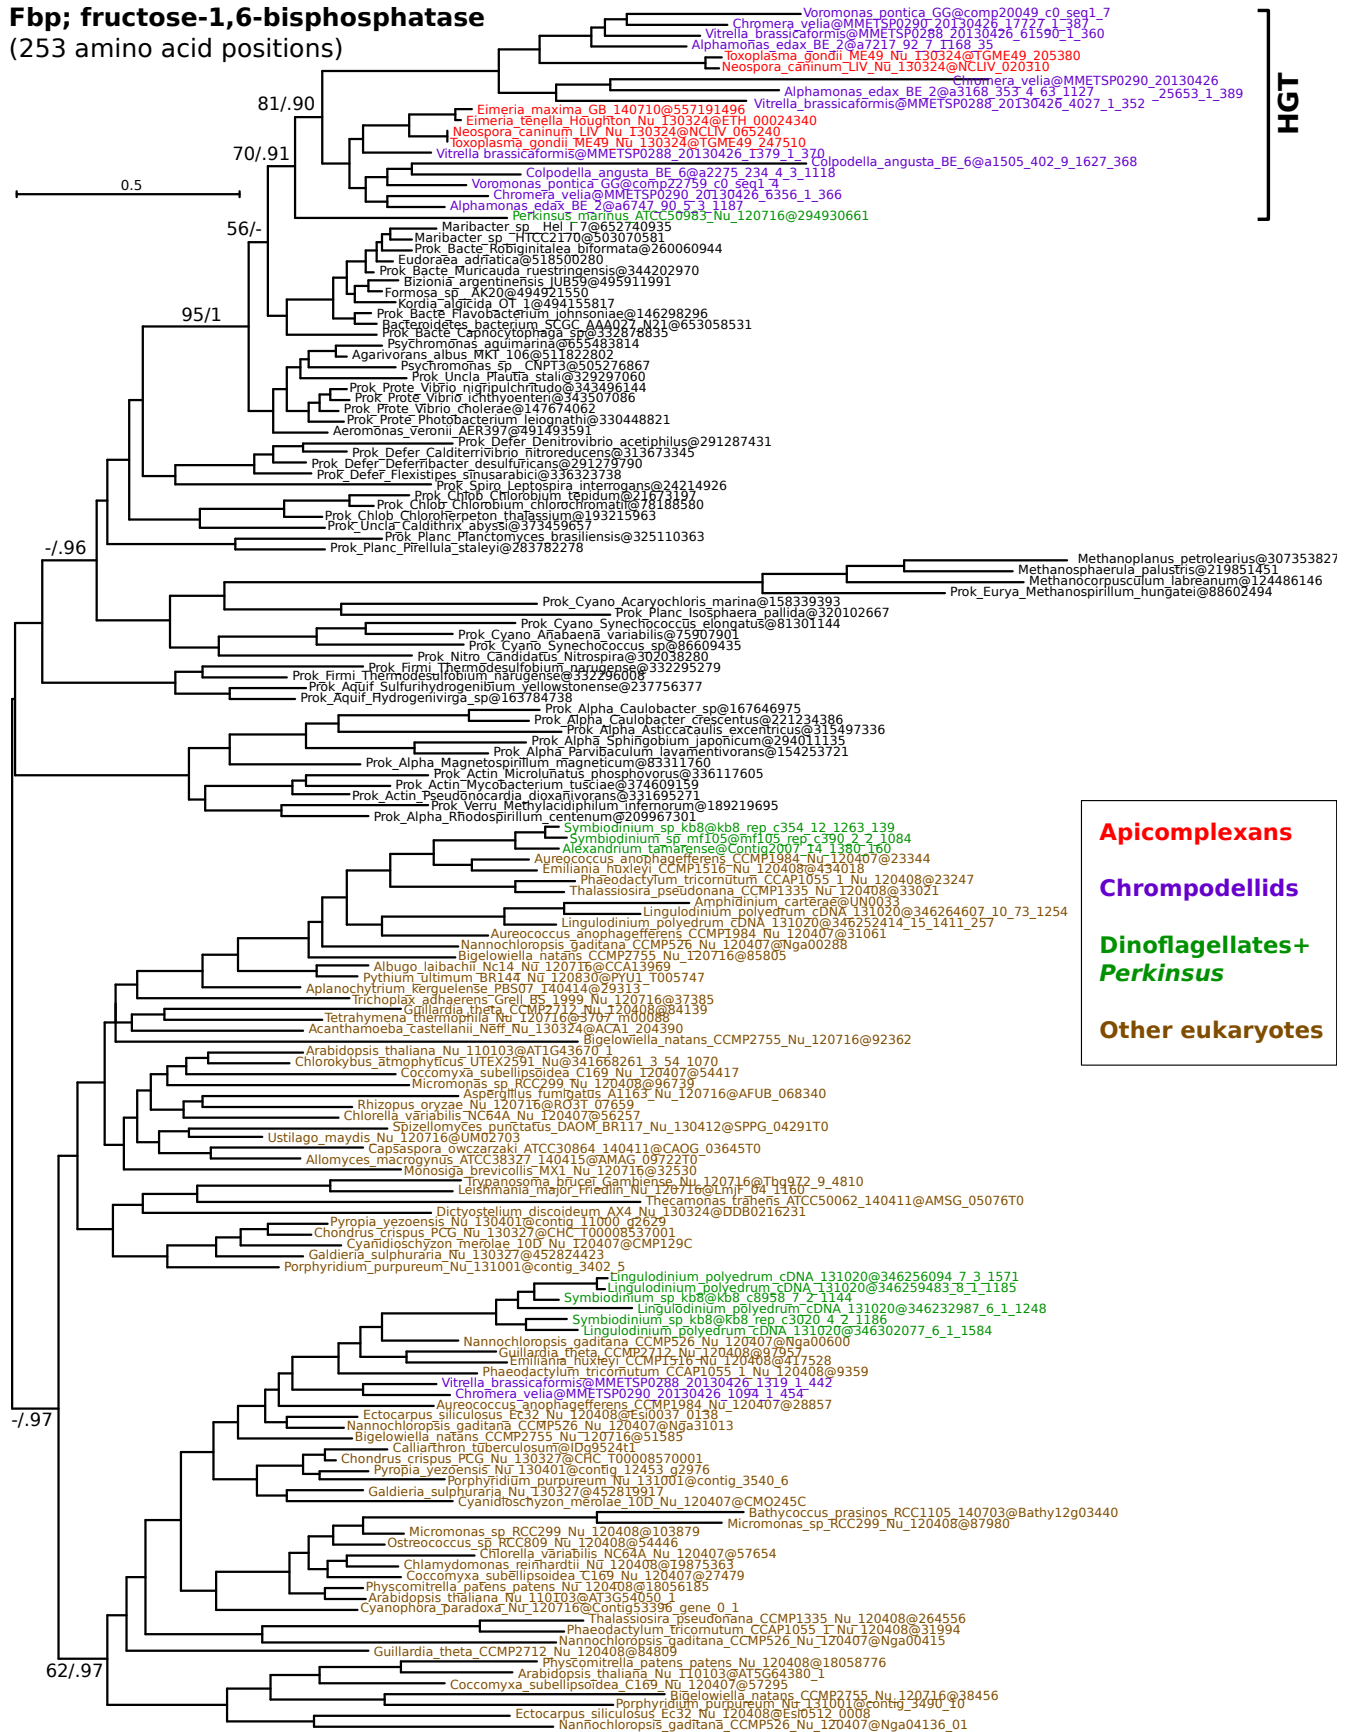

**FeCH (hemH);  
ferrochelatase  
(mitochondrial)**  
(218 amino acid  
positions)

**Apicomplexans**  
**Chromodellids**  
**Dinoflagellates +  
Perkinsus**  
**Other eukaryotes**

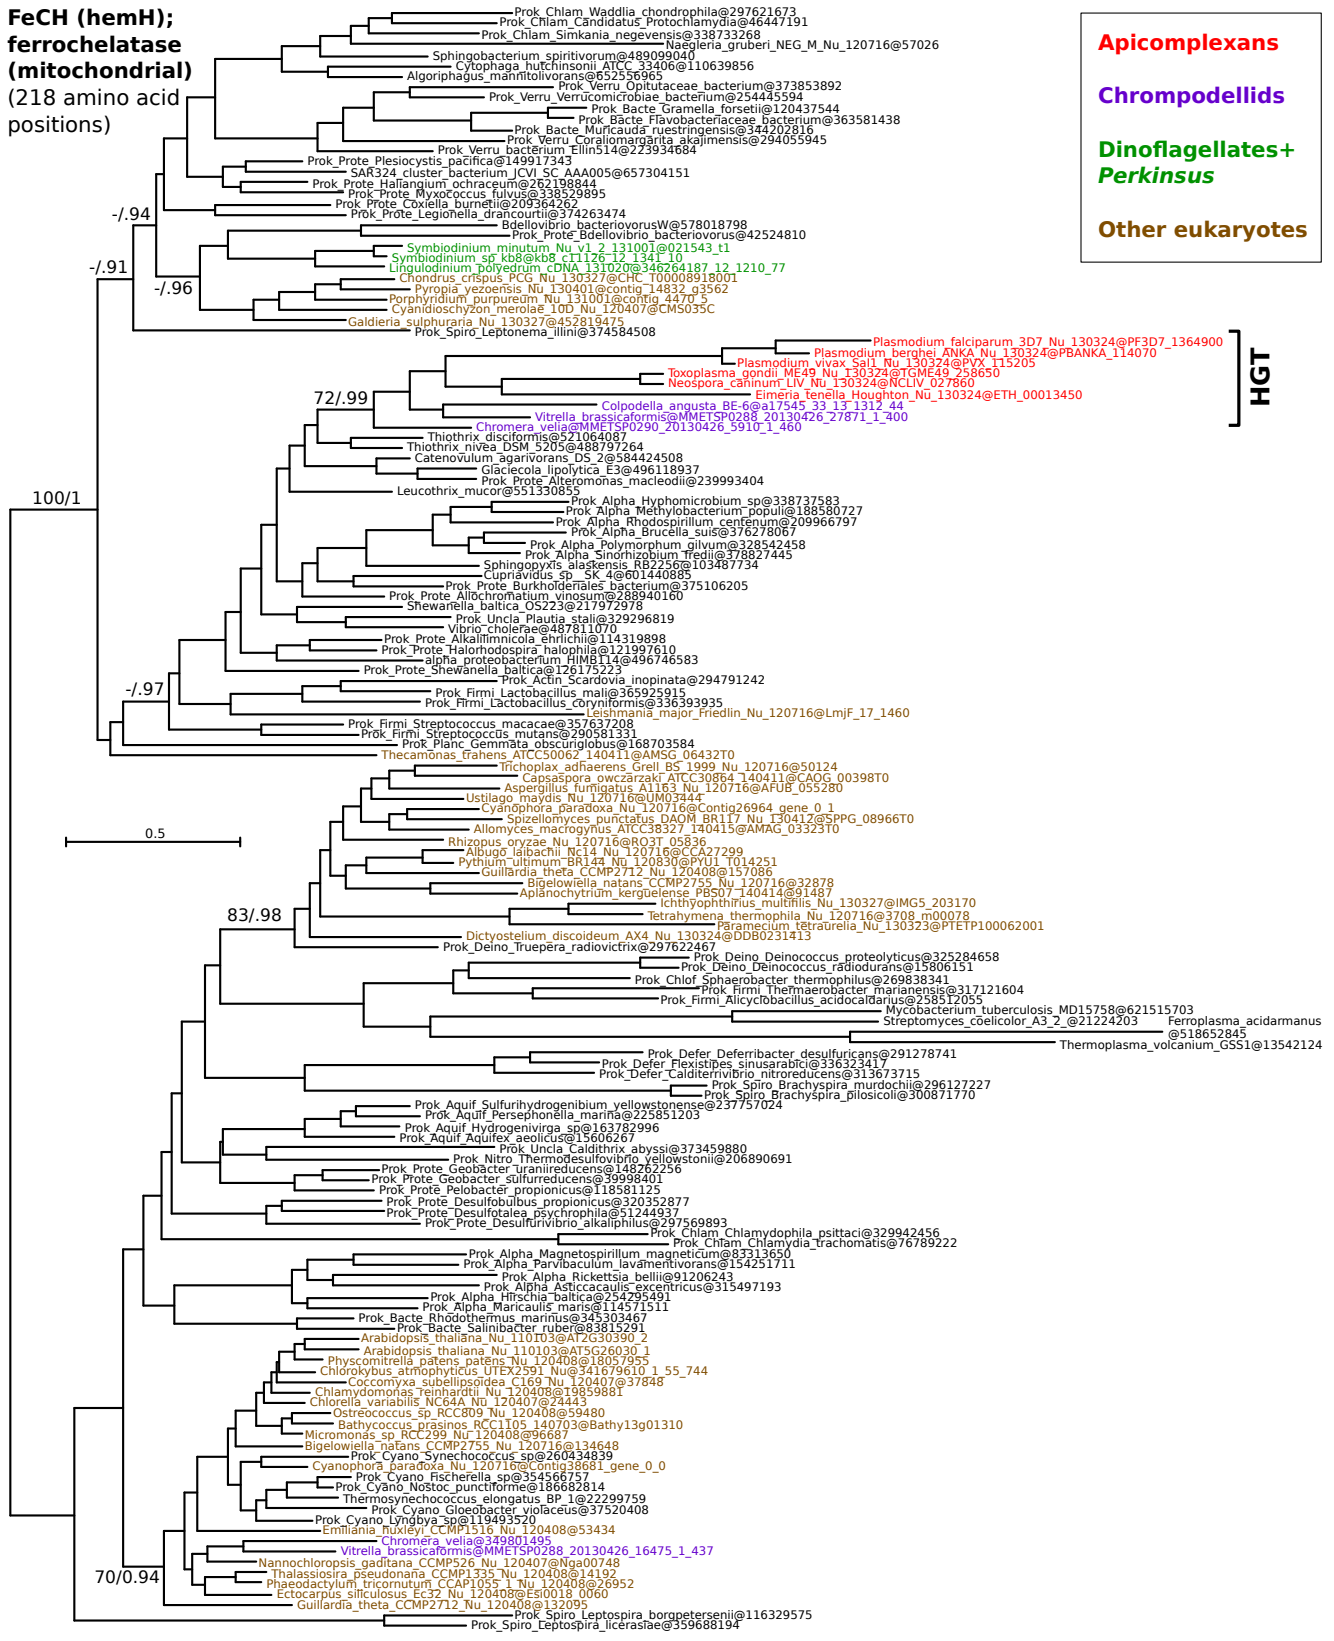

**GlgB; 1,4-alpha-glucan branching enzyme**  
(417 amino acid positions)

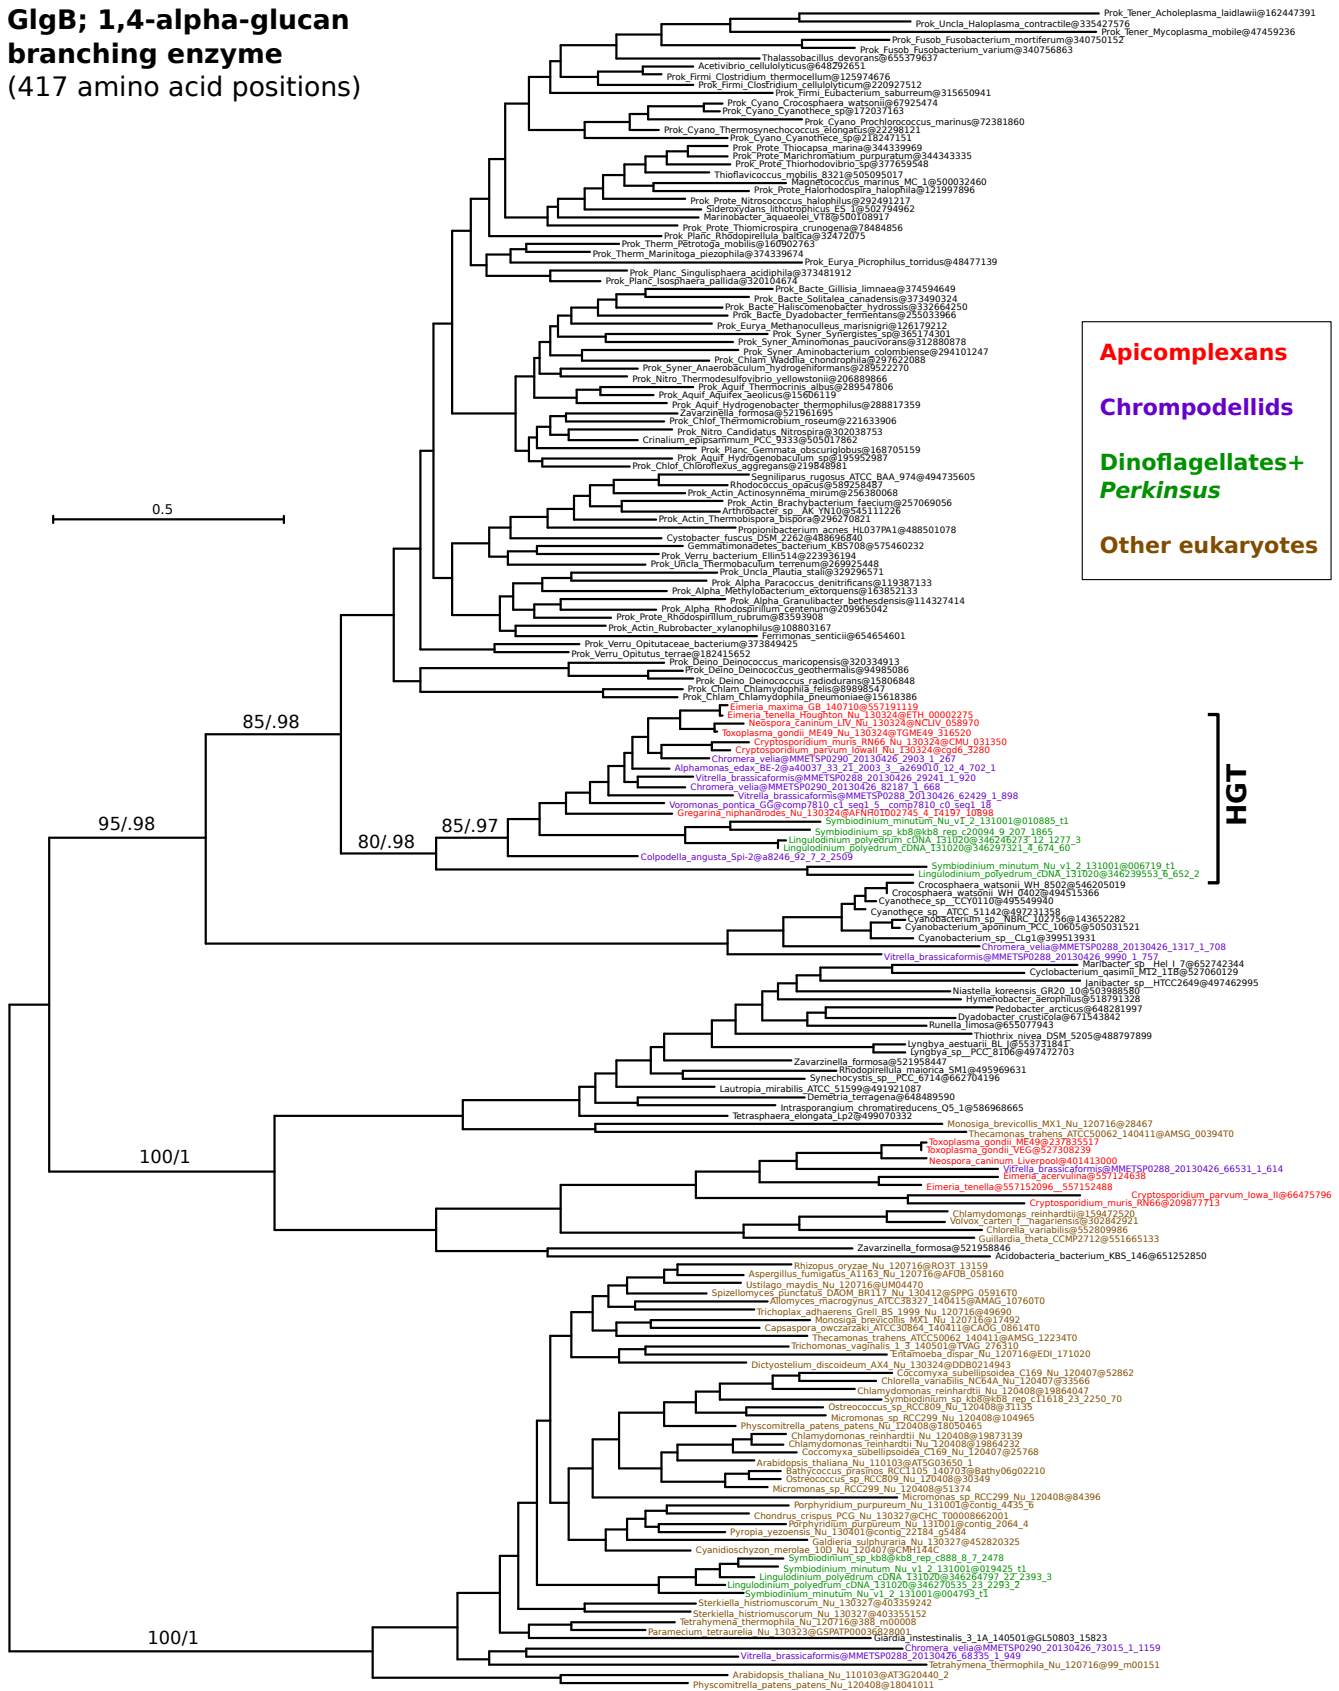

**Apicomplexans**  
**Chromodellids**  
**Dinoflagellates+**  
**Perkinsus**  
**Other eukaryotes**

**HGT**



**GlnA; glutamine synthetase**  
(390 amino acid positions)

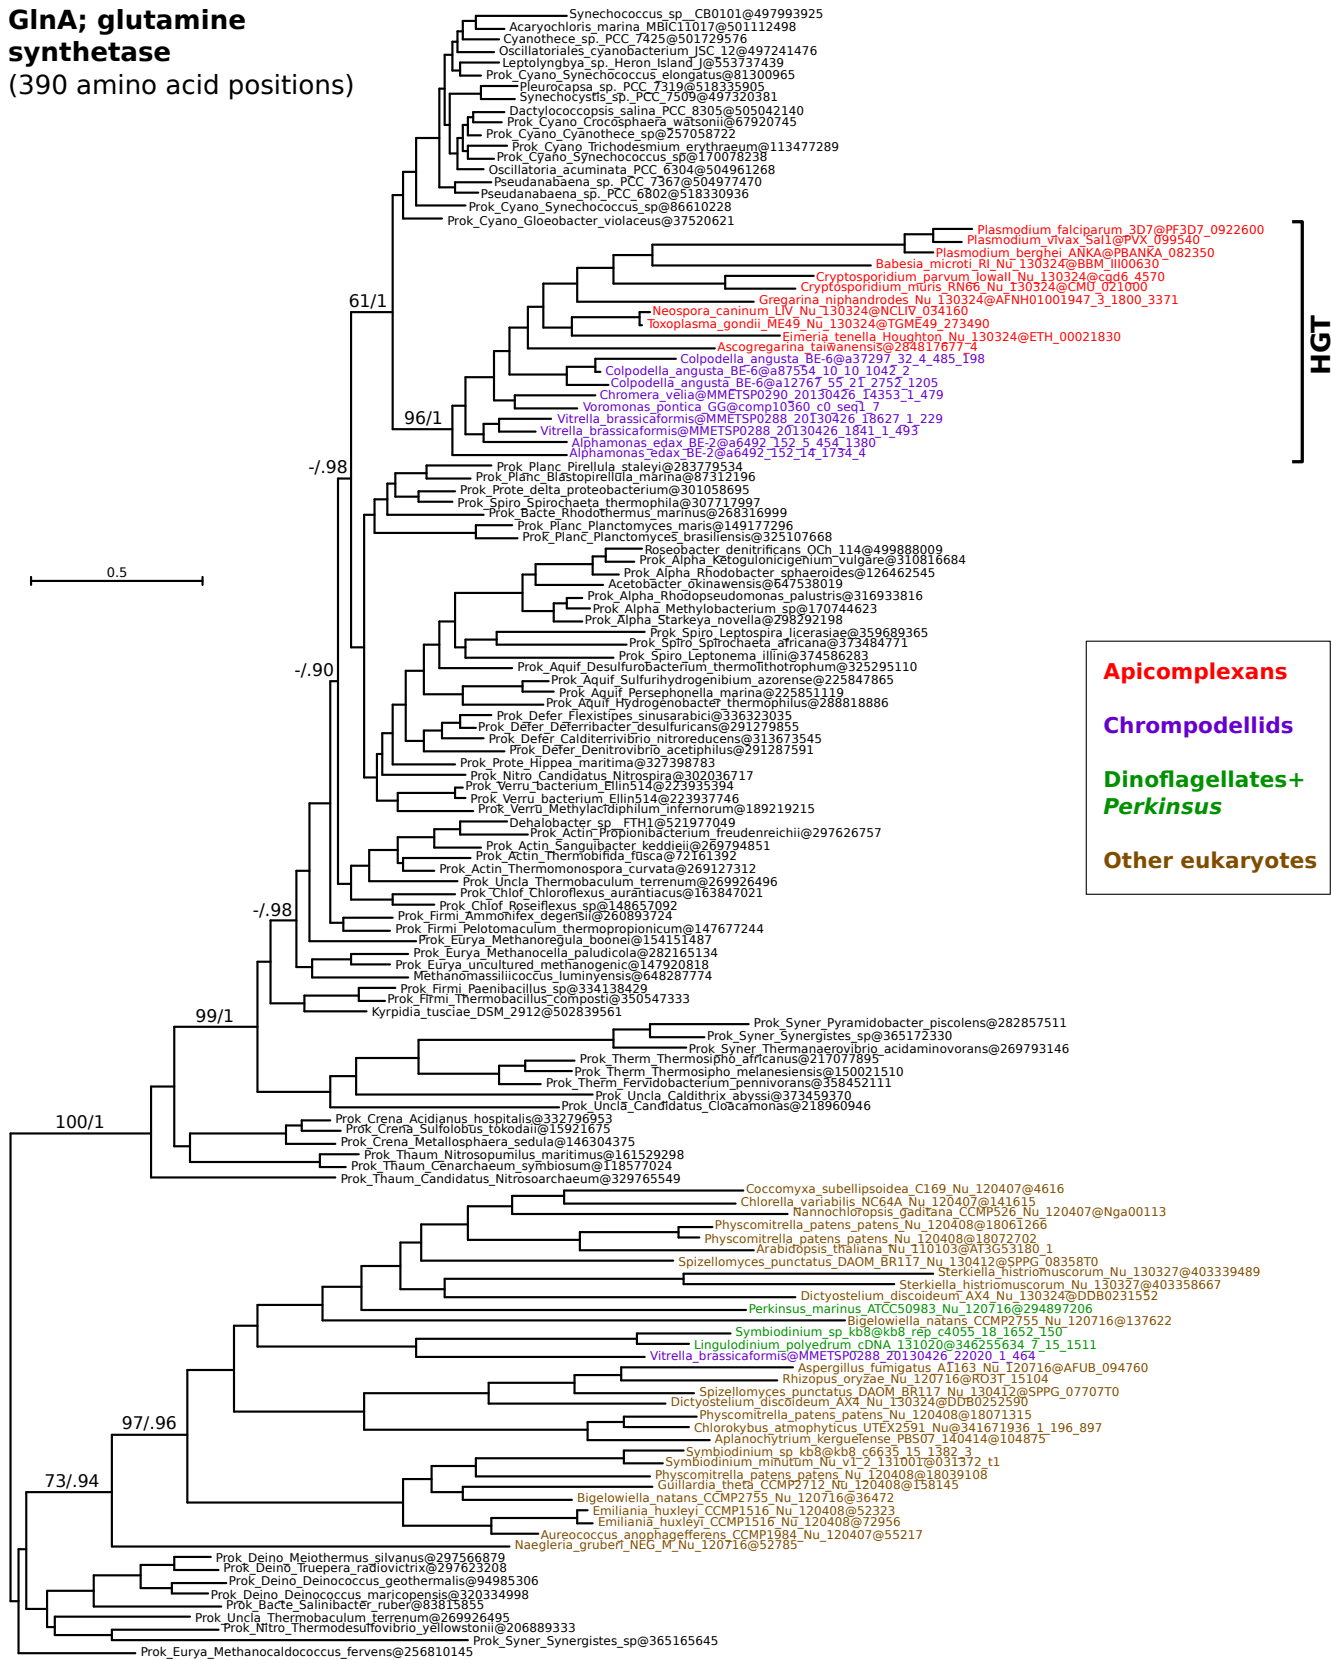

**IspH (LytB); 4-hydroxy-3-methylbut-2-enyl diphosphate reductase (plastidic)**  
(235 amino acid positions)

**Apicomplexans**  
**Chromodellids**  
**Dinoflagellates+ Perkinsus**  
**Other eukaryotes**

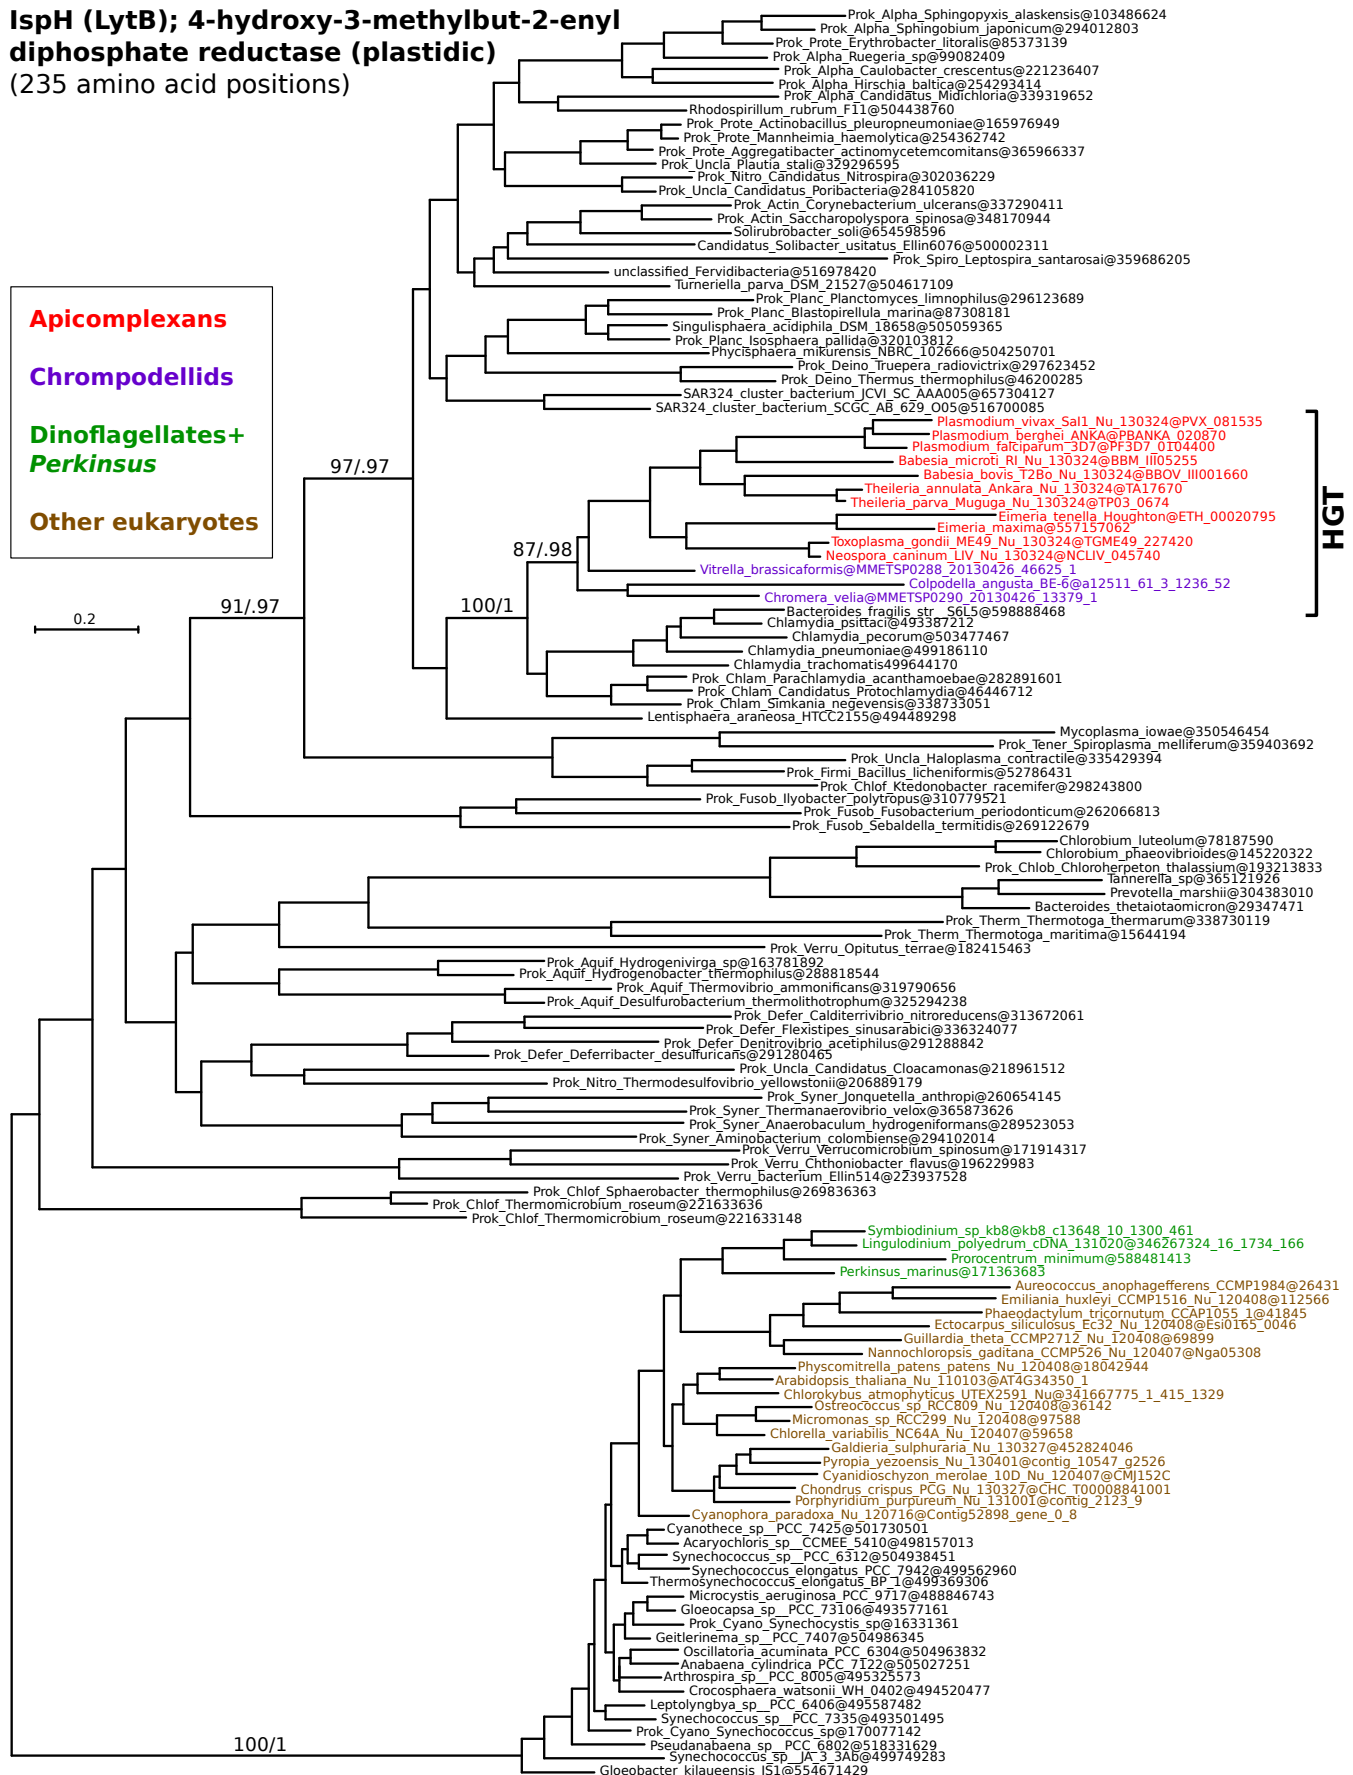

**MDH/LDH; malate/lactate dehydrogenase**  
(277 amino acid positions)

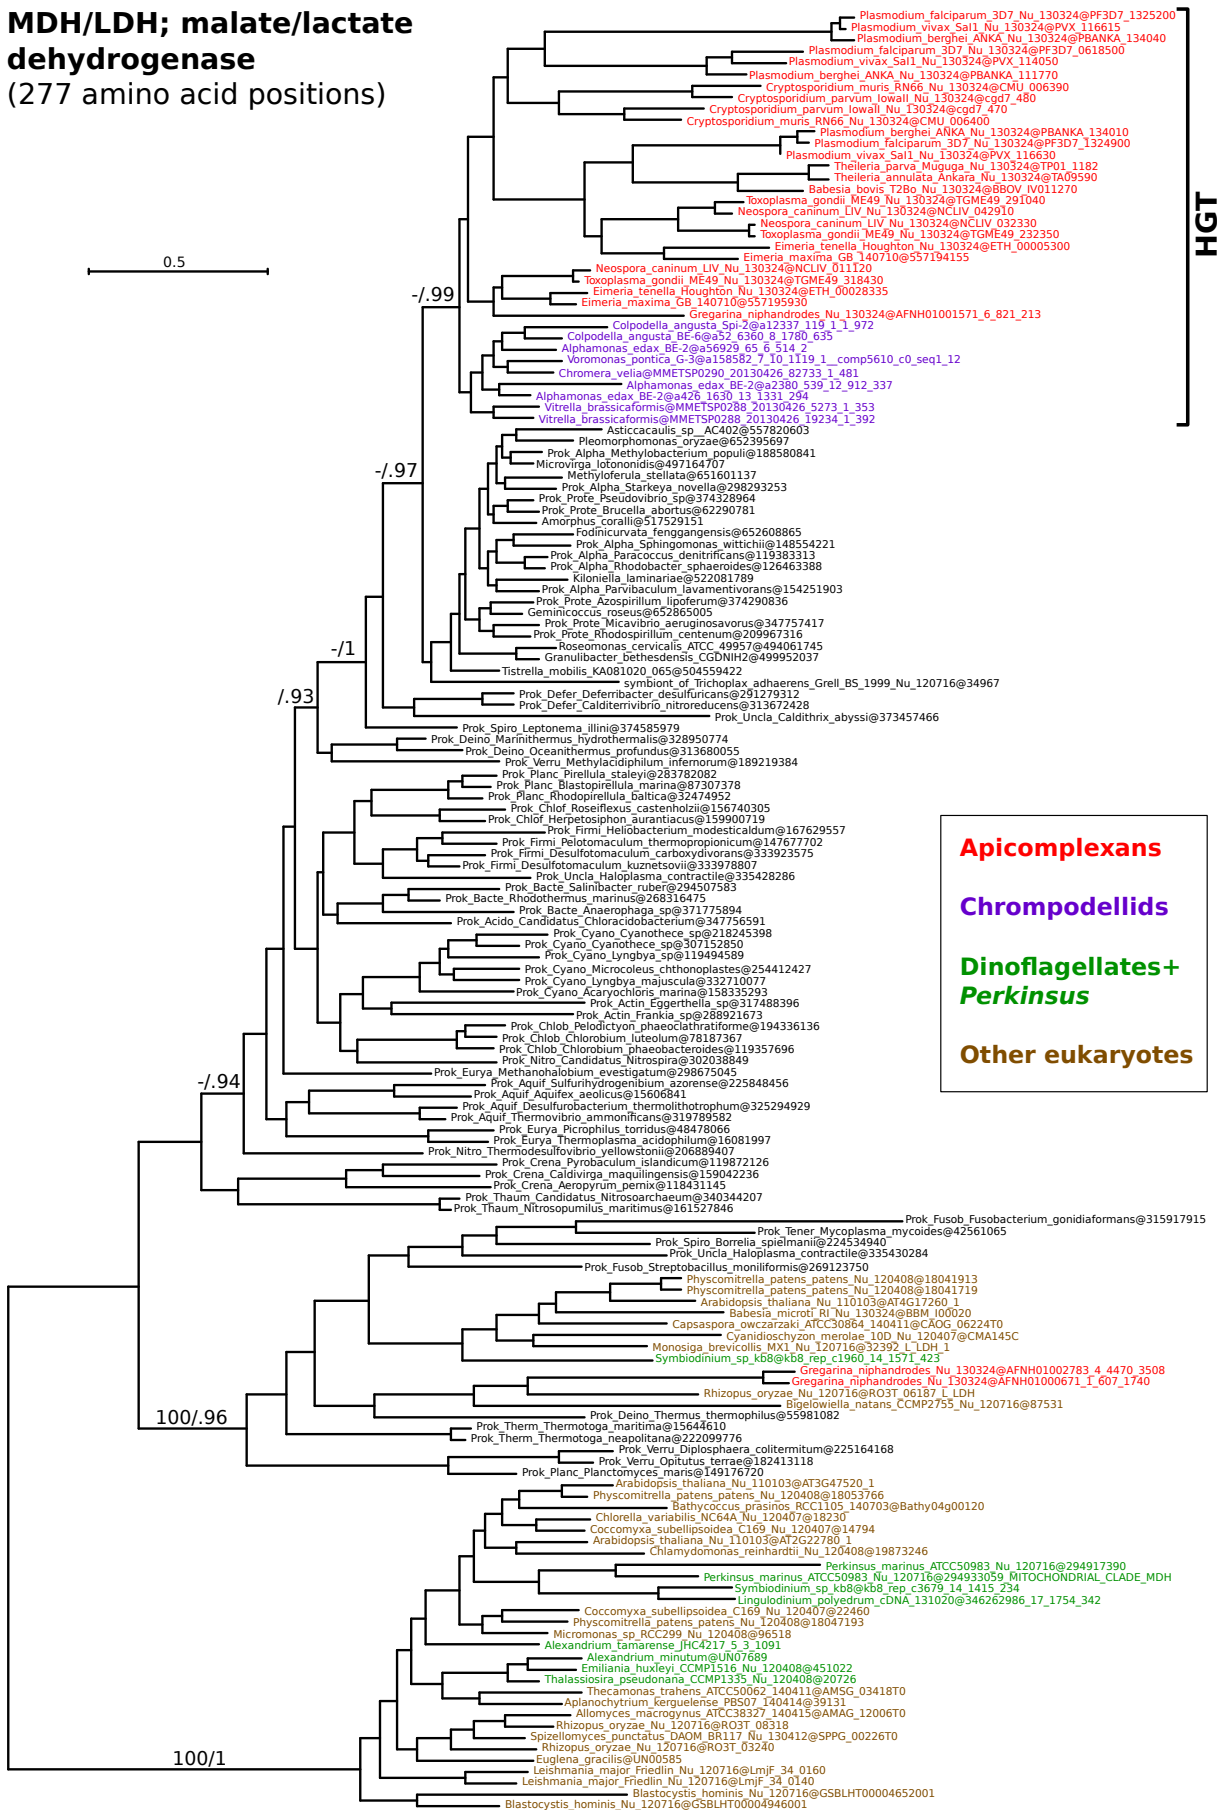

# PNP; purine-nucleoside phosphorylase

(157 amino acid positions)

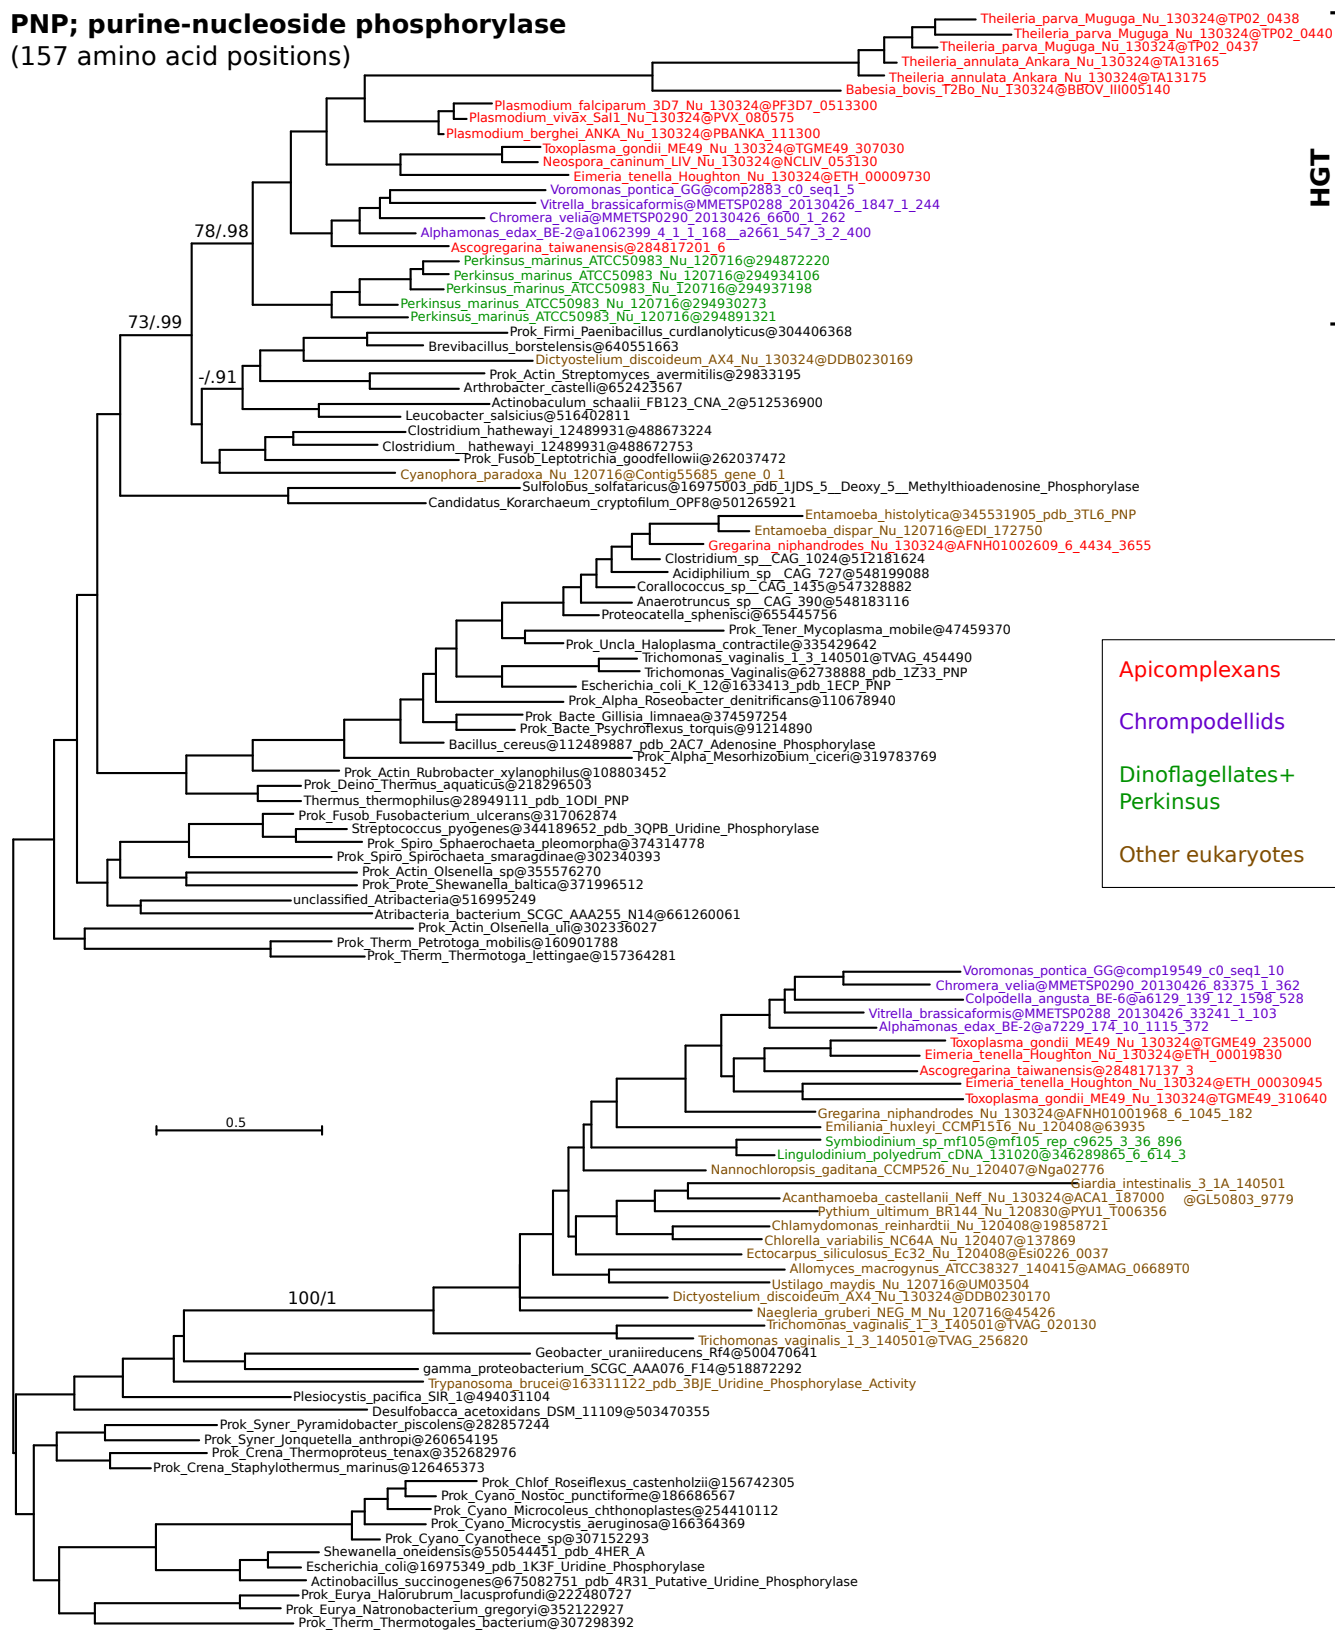

HGT

- Apicomplexans
- Chrompodellids
- Dinoflagellates+Perkinsus
- Other eukaryotes



**PUS; pseudouridylate synthase**  
206 amino acid positions)

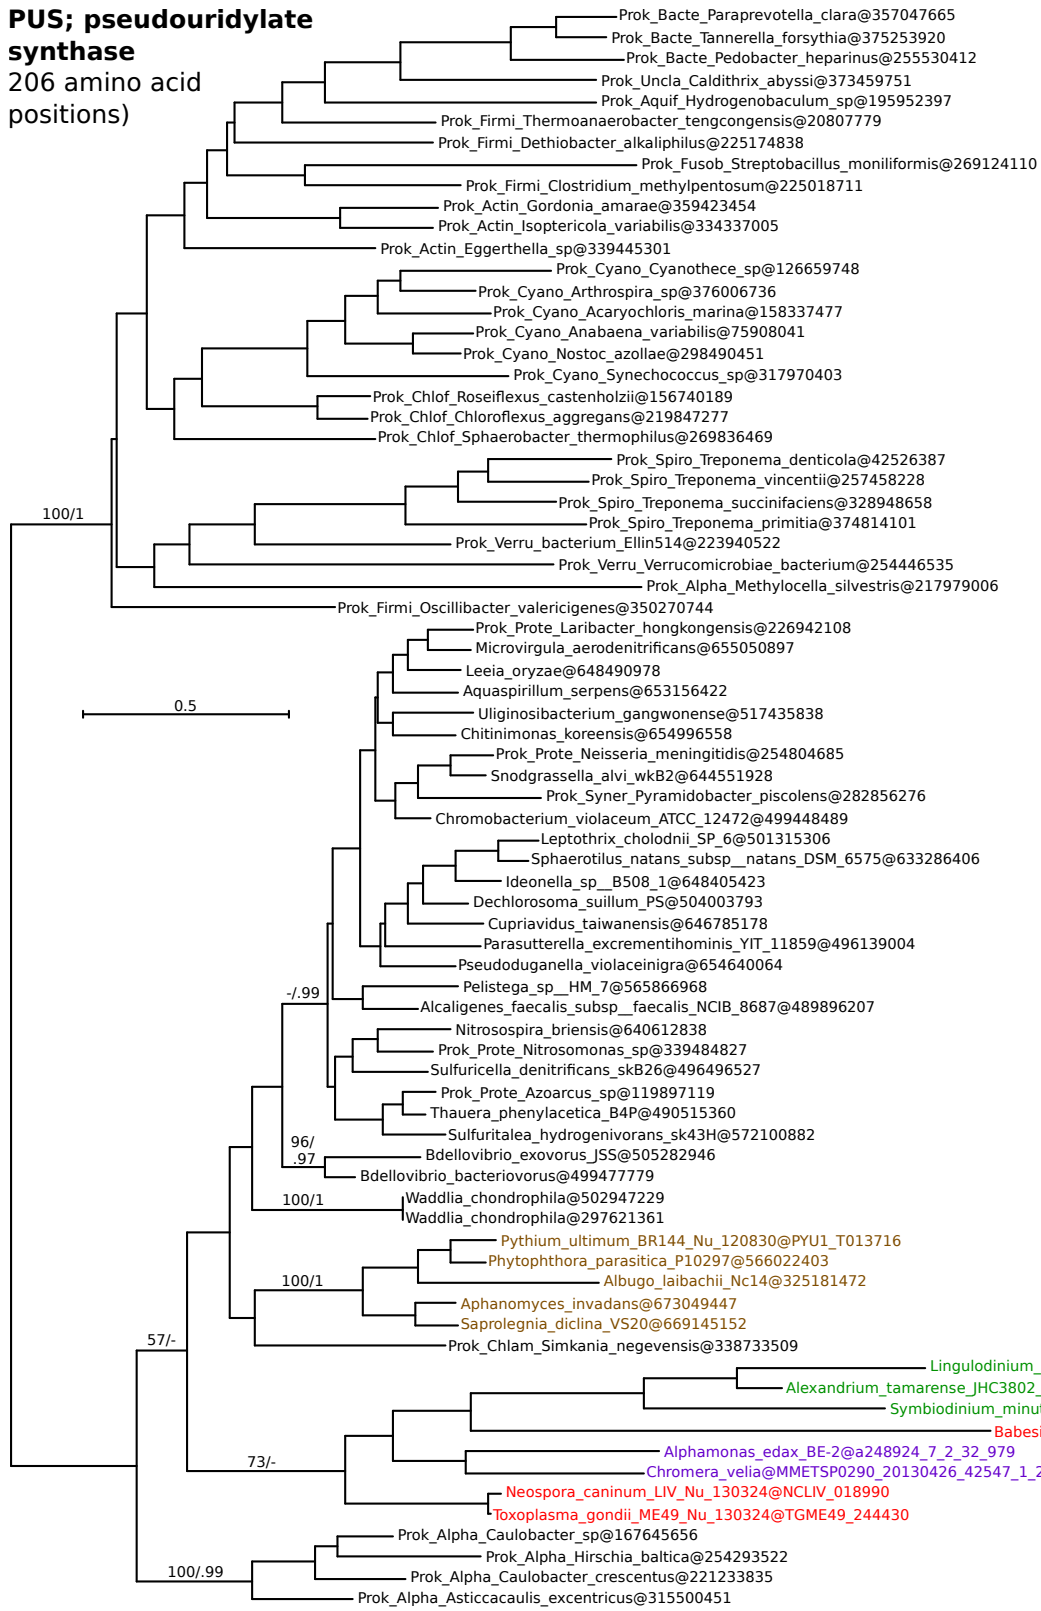

- Apicomplexans
- Chromodellids
- Dinoflagellates+ Perkinsus
- Other eukaryotes

HGT

**Thio; thioredoxin peroxidase**  
(177 amino acid positions)

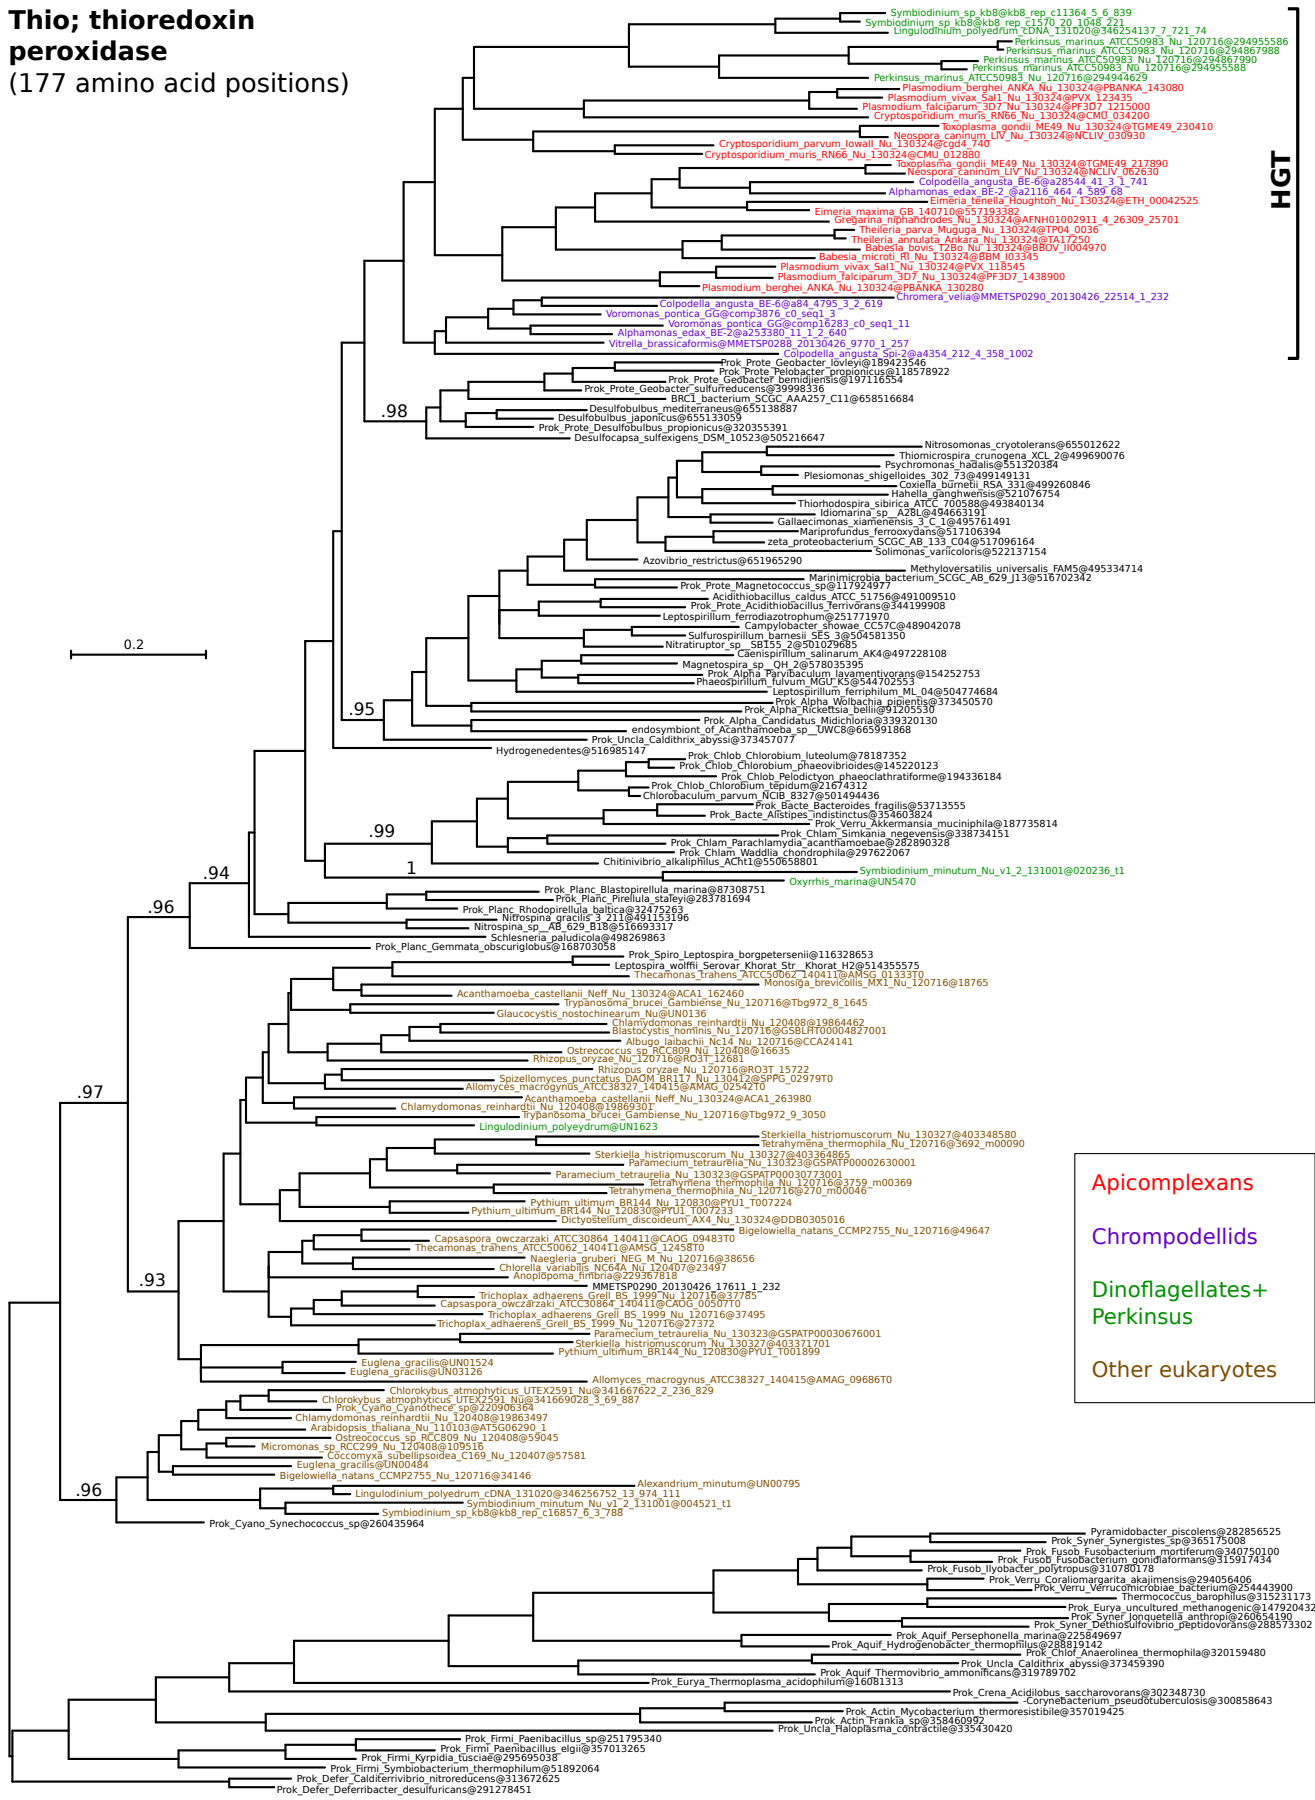

**YgfA;  
5-formyltetrahydrofolate  
cyclo-ligase**  
(144 amino acid  
positions)

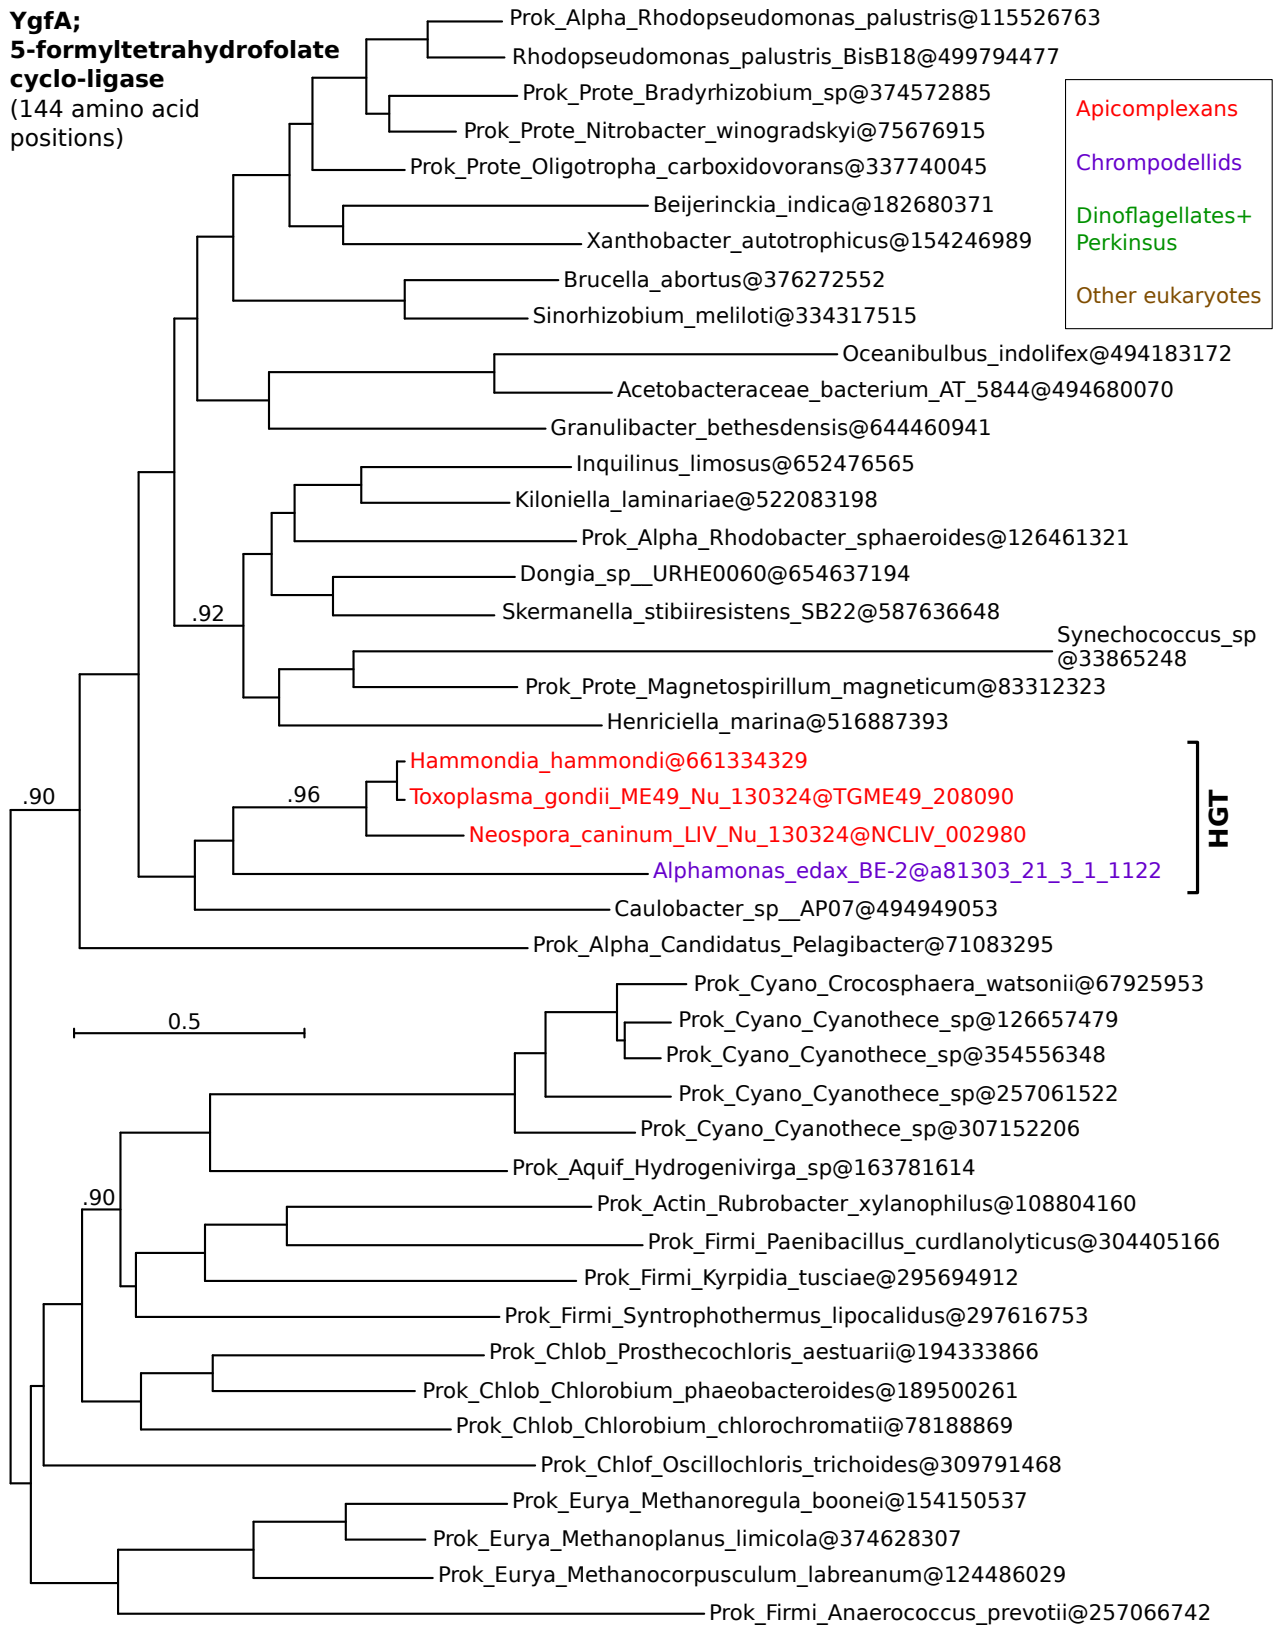



**Figure S6: Phylogeny of ribonucleotide reductase.**  
**Ribonucleotide reductase**  
 (240 amino acid positions)

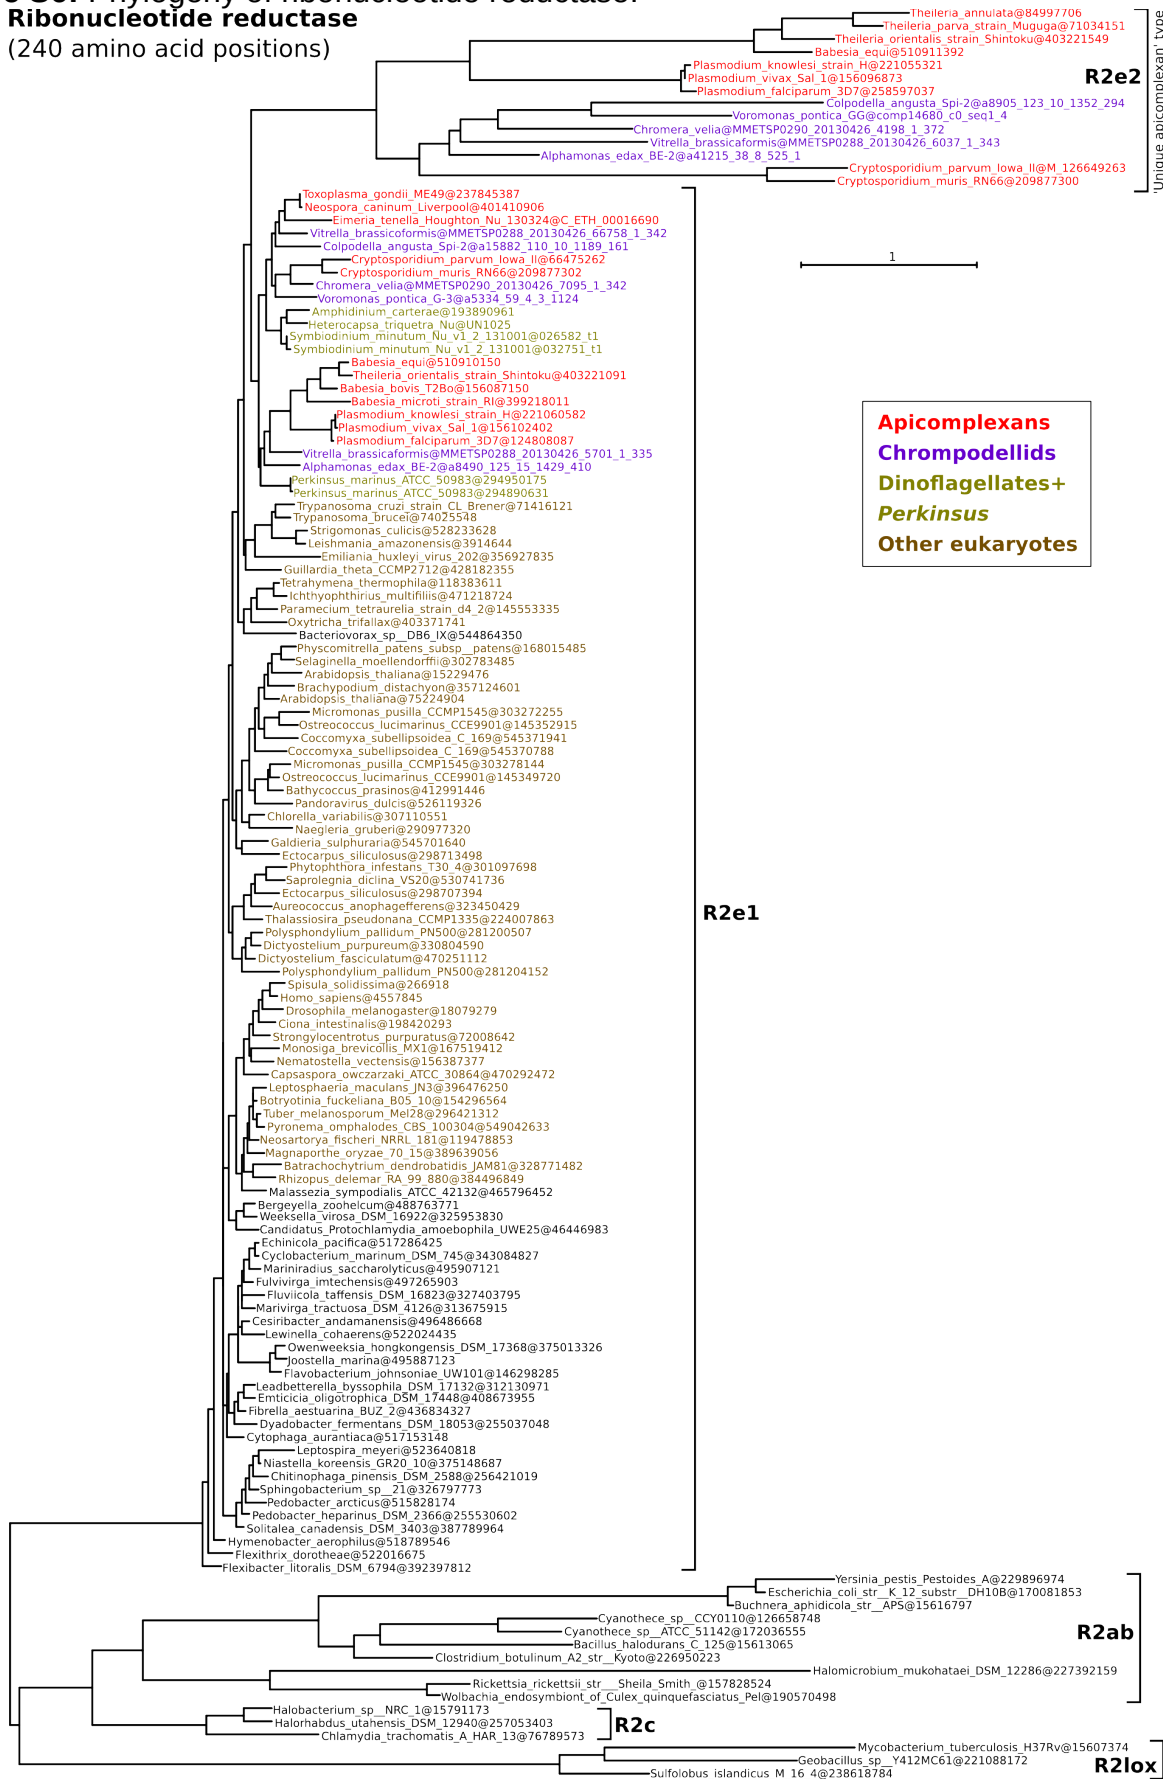

**Figure S7: Phylogeny of subtilisin proteases.**

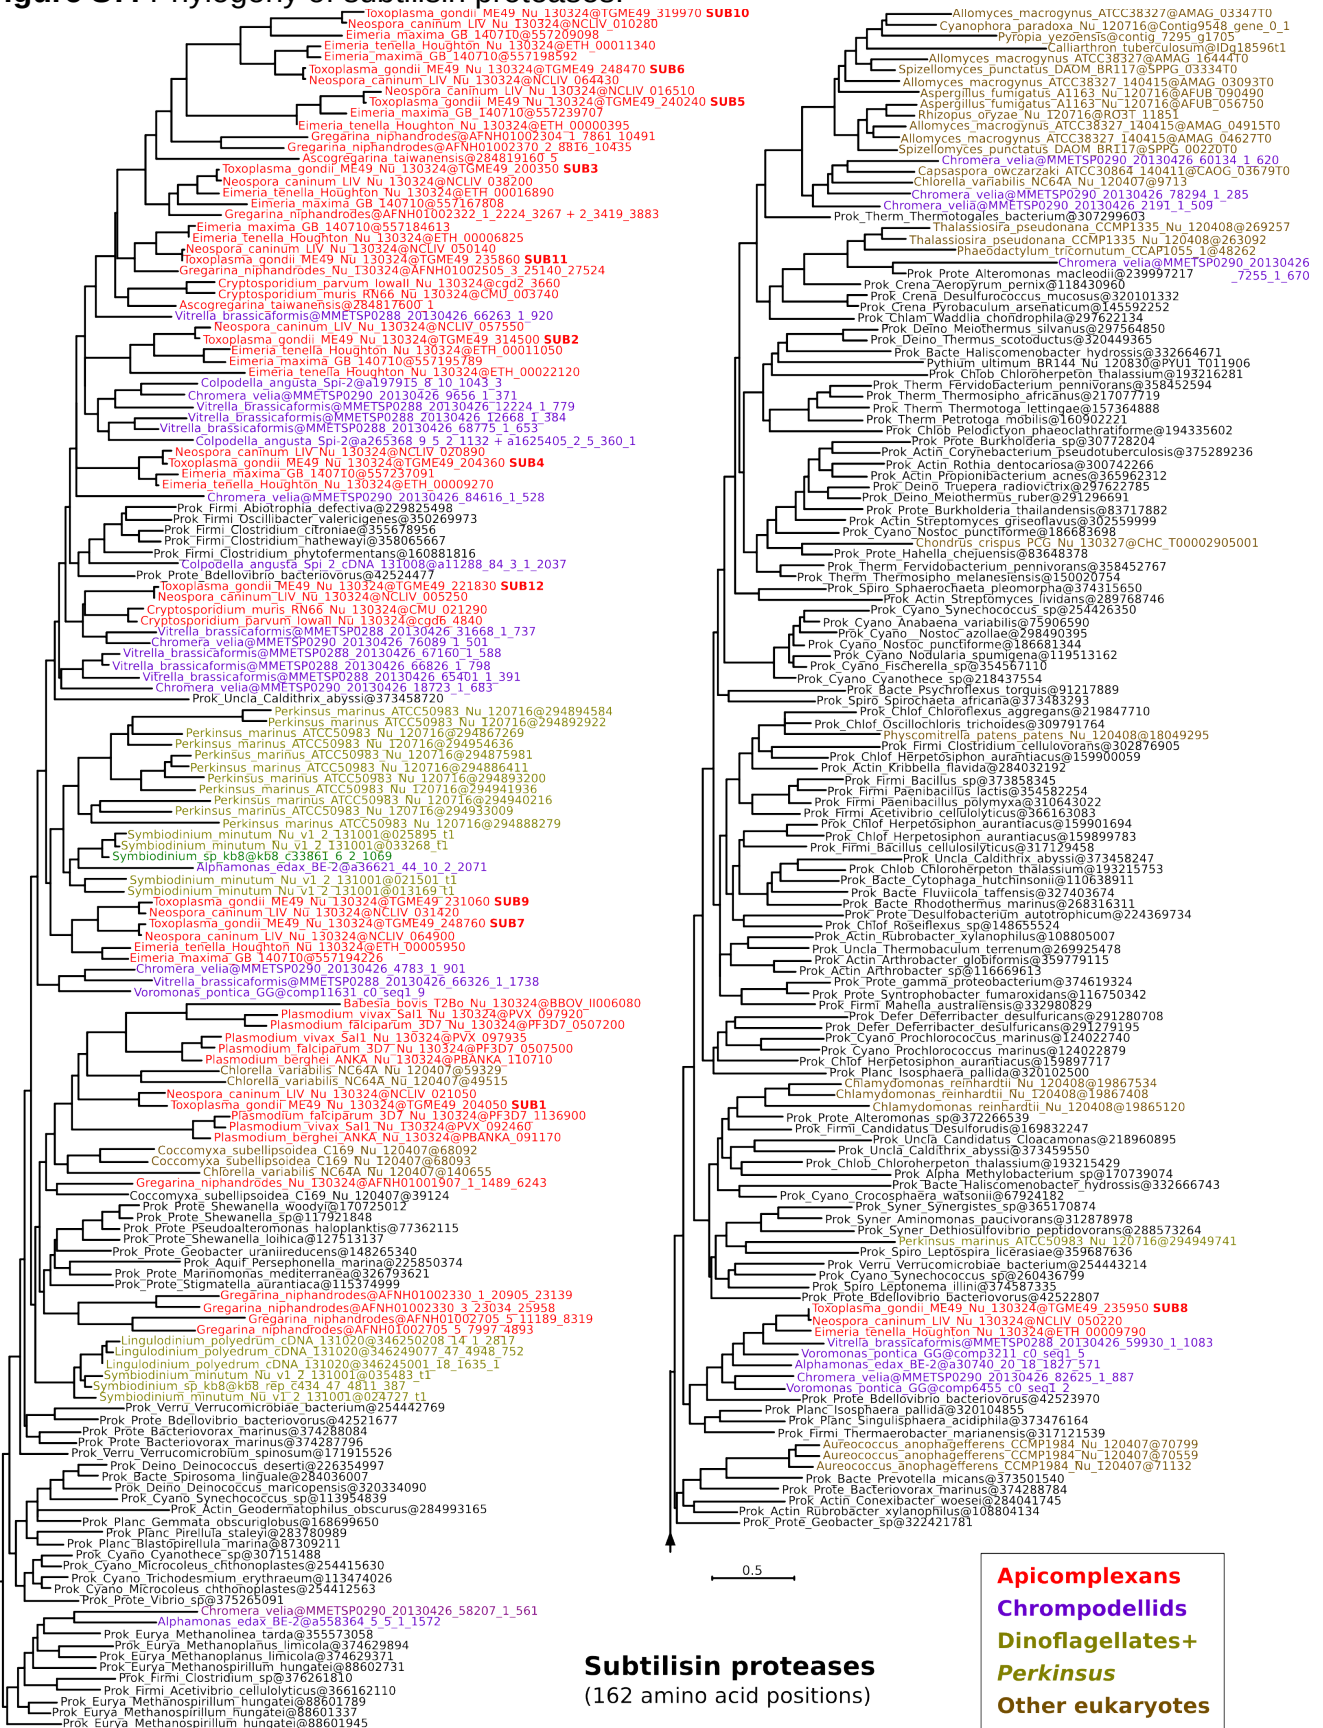

**Table S1: Environmental sequences related to apicomplexans that were used in this study.**

| Figure | Clone name | NCBI GI or Accession | Environment type <sup>1</sup> | Low O <sub>2</sub> <sup>2</sup> | Isolation source; Location                                           | Study <sup>3</sup> | Clade affiliation <sup>4</sup> |
|--------|------------|----------------------|-------------------------------|---------------------------------|----------------------------------------------------------------------|--------------------|--------------------------------|
| Fig. 1 | P107t1c2   | KP213182             | soil                          |                                 | soil from UBC endowment lands; Canada: Vancouver                     | THIS STUDY         | Env. clade IX                  |
| Fig. 1 | P107t1c6   | KP213184             | soil                          |                                 | soil from UBC endowment lands; Canada: Vancouver                     | THIS STUDY         | Env. clade IX                  |
| Fig. 1 | P107t6c1   | KP213185             | marine                        |                                 | damp woodchip and surface sand; Canada: Locarno Beach, Vancouver, BC | THIS STUDY         | Colpodella angusta             |
| Fig. 1 | P107t6c6   | KP213186             | marine                        |                                 | damp woodchip and surface sand; Canada: Locarno Beach, Vancouver, BC | THIS STUDY         | Colpodella angusta             |
| Fig. 1 | P108t7c1   | KP213187             | soil                          |                                 | soil from UBC endowment lands; Canada: Vancouver                     | THIS STUDY         | Colpodella angusta             |
| Fig. 1 | P108t7c2   | KP213188             | soil                          |                                 | soil from UBC endowment lands; Canada: Vancouver                     | THIS STUDY         | Env. clade IX                  |
| Fig. 1 | P109t4c2   | KP213191             | marine                        |                                 | damp woodchip and surface sand; Canada: Locarno Beach, Vancouver, BC | THIS STUDY         | Colpodella angusta             |
| Fig. 1 | P109t4c6   | KP213192             | marine                        |                                 | damp woodchip and surface sand; Canada: Locarno Beach, Vancouver, BC | THIS STUDY         | Colpodella angusta             |
| Fig. 1 | P113t2c1   | KP213195             | marine                        |                                 | woodchip on the beach; Canada: Boundary Bay, BC                      | THIS STUDY         | Colpodella angusta             |
| Fig. 1 | P113t2c6   | KP213196             | marine                        |                                 | woodchip on the beach; Canada: Boundary Bay, BC                      | THIS STUDY         | Colpodella angusta             |
| Fig. 1 | P114t10c3  | KP213197             | marine                        |                                 | mucus from Acropora formosa; USA: Birch Aquarium, San Diego, CA      | THIS STUDY         | Colpodella angusta             |
| Fig. 1 | P114t13c5  | KP213200             | marine                        |                                 | coral Acropora yongei; USA: Birch Aquarium, San Diego, CA            | THIS STUDY         | Env. clade IX                  |
| Fig. 1 | P114t9c5   | KP213202             | marine                        |                                 | mucus from Acropora yongei; USA: Birch Aquarium, San Diego, CA       | THIS STUDY         | Env. clade IX                  |
| Fig. 1 | P115t1c2   | KP213203             | marine                        |                                 | woodchip on the beach; Canada: Boundary Bay, BC                      | THIS STUDY         | Chromera velia                 |
| Fig. 1 | P115t1c3   | KP213204             | marine                        |                                 | woodchip on the beach; Canada: Boundary Bay, BC                      | THIS STUDY         | Colpodella angusta             |
| Fig. 1 | P116t19c4  | KP213207             | marine                        |                                 | JAR_04_2010_ARMS_A_Filter corners                                    | THIS STUDY         | Env. clade VIII                |
| Fig. 1 | P116t19c5  | KP213208             | marine                        |                                 | JAR_04_2010_ARMS_A_Filter corners                                    | THIS STUDY         | Env. clade VIII                |
| Fig. 1 | P116t19c7  | KP213209             | marine                        |                                 | JAR_04_2010_ARMS_A_Filter corners                                    | THIS STUDY         | Unresolved: Api.               |
| Fig. 1 | P122t3c2   | KP213211             | marine                        |                                 | coral Echinophyllia sp.; USA: Birch Aquarium, San Diego, CA          | THIS STUDY         | Env. clade V                   |
| Fig. 1 | P122t3c3   | KP213212             | marine                        |                                 | coral Echinophyllia sp.; USA: Birch Aquarium, San Diego, CA          | THIS STUDY         | Env. clade V                   |
| Fig. 1 | P122t3c4   | KP213213             | marine                        |                                 | coral Echinophyllia sp.; USA: Birch Aquarium, San Diego, CA          | THIS STUDY         | Env. clade V                   |
| Fig. 1 | P23t21c1   | KP213214             | marine                        |                                 | damp woodchip and surface sand; Canada: Locarno Beach, Vancouver, BC | THIS STUDY         | Unresolved: Api. relatives     |
| Fig. 1 | P23t21c2   | KP213215             | marine                        |                                 | damp woodchip and surface sand; Canada: Locarno Beach, Vancouver, BC | THIS STUDY         | Unresolved: Api. relatives     |
| Fig. 1 | P23t21c5   | KP213216             | marine                        |                                 | damp woodchip and surface sand; Canada: Locarno Beach, Vancouver, BC | THIS STUDY         | Unresolved: Api. relatives     |
| Fig. 1 | P23t5c3    | KP213217             | marine                        |                                 | damp woodchip and surface sand; Canada: Locarno Beach, Vancouver, BC | THIS STUDY         | Unresolved: Api. relatives     |
| Fig. 1 | P23t5c7    | KP213218             | marine                        |                                 | damp woodchip and surface sand; Canada: Locarno Beach, Vancouver, BC | THIS STUDY         | Unresolved: Api. relatives     |
| Fig. 1 | P23t5c8    | KP213219             | marine                        |                                 | damp woodchip and surface sand; Canada: Locarno Beach, Vancouver, BC | THIS STUDY         | Unresolved: Api. relatives     |
| Fig. 1 | P43t2c8    | KP213220             | marine                        |                                 | rocky intertidal spit; Canada: Spanish Banks, Vancouver, BC          | THIS STUDY         | Voromonas pontica              |
| Fig. 1 | P46t3c16   | KP213221             | marine                        |                                 | damp woodchip and surface sand; Canada: Locarno Beach, Vancouver, BC | THIS STUDY         | Unresolved: Api.               |
| Fig. 1 | P56t2c1    | KP213222             | soil                          |                                 | soil from UBC endowment lands; Canada: Vancouver                     | THIS STUDY         | Env. clade VI                  |
| Fig. 1 | P57t7c8    | KP213226             | soil                          |                                 | soil from UBC endowment lands; Canada: Vancouver                     | THIS STUDY         | Env. clade VI                  |
| Fig. 1 | P71t4c5    | KP213228             | marine                        |                                 | rocky intertidal spit; Canada: Spanish Banks, Vancouver, BC          | THIS STUDY         | Chromera velia                 |
| Fig. 1 | P71t4c7    | KP213229             | marine                        |                                 | rocky intertidal spit; Canada: Spanish Banks, Vancouver, BC          | THIS STUDY         | Chromera velia                 |
| Fig. 1 | P79t3c2    | KP213230             | marine                        |                                 | damp woodchip and surface sand; Canada: Locarno Beach, Vancouver, BC | THIS STUDY         | Unresolved: Api. relatives     |
| Fig. 1 | P79t3c8    | KP213231             | marine                        |                                 | damp woodchip and surface sand; Canada: Locarno Beach, Vancouver, BC | THIS STUDY         | Colpodella angusta             |

|        |               |           |                     |     |                                                                               |                                             |                            |
|--------|---------------|-----------|---------------------|-----|-------------------------------------------------------------------------------|---------------------------------------------|----------------------------|
| Fig. 1 | P83t1c3       | KP213232  | marine              |     | rocky intertidal spit; Canada: Spanish Banks, Vancouver, BC                   | THIS STUDY                                  | Chromera velia             |
| Fig. 1 | P85t4c2       | KP213233  | marine              |     | damp woodchip and surface sand; Canada: Locarno Beach, Vancouver, BC          | THIS STUDY                                  | Colpodella angusta         |
| Fig. 1 | P85t4c5       | KP213234  | marine              |     | damp woodchip and surface sand; Canada: Locarno Beach, Vancouver, BC          | THIS STUDY                                  | Colpodella angusta         |
| Fig. 1 | P87t1c4       | KP213235  | soil                |     | soil from UBC endowment lands; Canada: Vancouver                              | THIS STUDY                                  | Chromera velia             |
| Fig. 1 | P87t2c1       | KP213236  | soil                |     | soil from UBC endowment lands; Canada: Vancouver                              | THIS STUDY                                  | Env. clade VI              |
| Fig. 1 | P87t2c5       | KP213238  | soil                |     | soil from UBC endowment lands; Canada: Vancouver                              | THIS STUDY                                  | Chromera velia             |
| Fig. 1 | P87t3c4       | KP213239  | marine              |     | rocky intertidal spit; Canada: Spanish Banks, Vancouver, BC                   | THIS STUDY                                  | Chromera velia             |
| Fig. 1 | P87t4c1       | KP213240  | marine              |     | rocky intertidal spit; Canada: Spanish Banks, Vancouver, BC                   | THIS STUDY                                  | Chromera velia             |
| Fig. 1 | P87t4c2       | KP213241  | marine              |     | rocky intertidal spit; Canada: Spanish Banks, Vancouver, BC                   | THIS STUDY                                  | Chromera velia             |
| Fig. 1 | P87t5c2       | KP213242  | marine              |     | damp woodchip and surface sand; Canada: Locarno Beach, Vancouver, BC          | THIS STUDY                                  | Chromera velia             |
| Fig. 1 | P87t5c3a      | KP213243  | marine              |     | damp woodchip and surface sand; Canada: Locarno Beach, Vancouver, BC          | THIS STUDY                                  | Chromera velia             |
| Fig. 1 | P87t5c4       | KP213245  | marine              |     | damp woodchip and surface sand; Canada: Locarno Beach, Vancouver, BC          | THIS STUDY                                  | Chromera velia             |
| Fig. 1 | P87t8c3       | KP213246  | soil                |     | soil from UBC endowment lands; Canada: Vancouver                              | THIS STUDY                                  | Env. clade VI              |
| Fig. 1 | P87t8c4       | KP213247  | soil                |     | soil from UBC endowment lands; Canada: Vancouver                              | THIS STUDY                                  | Env. clade VI              |
| Fig. 1 | P97t1c1       | KP213251  | marine              |     | Dry high-beach sand; Canada: Boundary Bay, BC                                 | THIS STUDY                                  | Env. clade IX              |
| Fig. 1 | P97t5c2       | KP213256  | freshwater          |     | freshwater duck pond near the beach; Canada: Boundary Bay, BC                 | THIS STUDY                                  | Chromera velia             |
| Fig. 1 | P97t6c3       | KP213258  | marine              |     | woodchip on the beach; Canada: Boundary Bay, BC                               | THIS STUDY                                  | Voromonas pontica          |
| Fig. 1 | 6             | 472401464 | animal feces/manure | YES | Megalapteryx didinus coprolite, sample 10198a; New Zealand: Dart River Valley | PLoS ONE 8(2): E57315 (2013)                | Colpodella angusta         |
| Fig. 1 | 7             | 472401465 | animal feces/manure | YES | Megalapteryx didinus coprolite, sample 10198a; New Zealand: Dart River Valley | PLoS ONE 8(2): E57315 (2013)                | Colpodella angusta         |
| Fig. 1 | 56059         | 6606066   | marine              |     | European oyster, Ostrea edulis                                                | Unpublished                                 | Unresolved: Api.           |
| Fig. 1 | 1_133         | 171199596 | marine              |     | marine sediment; East Sea                                                     | J. Microbiol. 46 (3), 244-249 (2008)        | Env. clade I               |
| Fig. 1 | 1_41          | 156466089 | marine              |     | marine sediment; East Sea                                                     | J. Microbiol. 46 (3), 244-249 (2008)        | Env. clade I               |
| Fig. 1 | 1_52          | 156466099 | marine              |     | marine sediment; East Sea                                                     | J. Microbiol. 46 (3), 244-249 (2008)        | Env. clade I               |
| Fig. 1 | 1_73          | 156466110 | marine              |     | marine sediment; East Sea                                                     | J. Microbiol. 46 (3), 244-249 (2008)        | Env. clade I               |
| Fig. 1 | 9_12          | 156466122 | marine              |     | marine sediment; East Sea                                                     | J. Microbiol. 46 (3), 244-249 (2008)        | Env. clade I               |
| Fig. 1 | 9_39          | 156466143 | marine              |     | marine sediment; East Sea                                                     | J. Microbiol. 46 (3), 244-249 (2008)        | Env. clade I               |
| Fig. 1 | 9_61          | 156466155 | marine              |     | marine sediment; East Sea                                                     | J. Microbiol. 46 (3), 244-249 (2008)        | Env. clade VIII            |
| Fig. 1 | A_1_87        | 304361468 | freshwater          |     | paddy field soil; Japan: Aomori                                               | Microbes Environ. 25 (4), 281-287 (2010)    | Unresolved:Api. relatives  |
| Fig. 1 | A2_E039       | 18025924  | marine              | YES | hydrothermal sediment; Guaymas Basin                                          | PNAS 99 (11), 7658-62 (2002)                | Unresolved: Api. relatives |
| Fig. 1 | AA5F13RJ1A10  | 291497875 | marine              |     | oxygenated water column; Cariaco Basin, Caribbean Sea                         | ISME J 5 (8), 1344-1356 (2011)              | Unresolved:Api. relatives  |
| Fig. 1 | AE-2012_FL1   | 411025944 | freshwater          |     | laboratory dishes with mosquito larvae; USA: Rutgers university               | Aquat.Ecol.:10.1007/s10452-014-9474-3(2014) | Colpodella angusta         |
| Fig. 1 | ANEK03F02     | 345648463 | soil                |     | soil in front of the Brazilian Antarctic Station; Antarctica                  | Unpublished                                 | Colpodella angusta         |
| Fig. 1 | BAQA40        | 20377996  | marine              | YES | anoxic marine sediment; USA: Berkeley Aquatic Park, Berkeley, CA              | PNAS 99 (12), 8324-29 (2002)                | Env. clade VII             |
| Fig. 1 | BCB5F13RM1D02 | 291498055 | marine              | YES | anoxic water column sample; Caribbean Sea: Cariaco Basin                      | ISME J 5 (8), 1344-1356 (2011)              | Api.: genotype N           |
| Fig. 1 | BCB3F14RJ3H04 | 291495817 | marine              | YES | anoxic water column sample; Caribbean Sea: Cariaco Basin                      | ISME J 5 (8), 1344-1356 (2011)              | Env. clade X               |
| Fig. 1 | BCB5F14RJ1F07 | 291495355 | marine              | YES | anoxic water column sample; Caribbean Sea: Cariaco Basin                      | ISME J 5 (8), 1344-1356 (2011)              | Env. clade X               |
| Fig. 1 | BIO10_B6      | 270381369 | marine              | YES | deep water, depth 500m; Pacific Ocean: South Pacific                          | Environ. Microbiol. 12 (11), 2946-64 (2010) | Voromonas pontica          |
| Fig. 1 | BIO3_B2       | 270381403 | marine              | YES | deep water, depth 500m; Pacific Ocean: South Pacific                          | Environ. Microbiol. 12 (11), 2946-64 (2010) | Voromonas pontica          |

|        |                               |           |                     |     |                                                                              |                                               |                            |
|--------|-------------------------------|-----------|---------------------|-----|------------------------------------------------------------------------------|-----------------------------------------------|----------------------------|
| Fig. 1 | BOLA176                       | 20378006  | marine              | YES | anoxic marine sediment; USA: Bolinas Tidal Flat, Bolinas, CA                 | PNAS 99 (12), 8324-29 (2002)                  | Colpodella angusta         |
| Fig. 1 | BOLA553                       | 20378005  | marine              | YES | anoxic marine sediment; USA: Bolinas Tidal Flat, Bolinas, CA                 | PNAS 99 (12), 8324-29 (2002)                  | Env. clade V               |
| Fig. 1 | BOLA566                       | 20378000  | marine              | YES | anoxic marine sediment; USA: Bolinas Tidal Flat, Bolinas, CA                 | PNAS 99 (12), 8324-29 (2002)                  | Env. clade VI              |
| Fig. 1 | BOLA914                       | 20377992  | marine              | YES | anoxic marine sediment; USA: Bolinas Tidal Flat, Bolinas, CA                 | PNAS 99 (12), 8324-29 (2002)                  | Env. clade IV              |
| Fig. 1 | Buttons_D03                   | 300088832 | marine (*)          |     | intertidal thrombolites; Bahamas: Highborne Cay                              | Geobiology 8 (4), 337-354 (2010)              | Vitrella brassicaformis    |
| Fig. 1 | C1_E039                       | 18025812  | marine              | YES | hydrothermal sediment; Guaymas Basin                                         | PNAS 99 (11), 7658-62 (2002)                  | Api.:Polyplicarum -related |
| Fig. 1 | C1_E047                       | 18025817  | marine              | YES | hydrothermal sediment; Guaymas Basin                                         | PNAS 99 (11), 7658-62 (2002)                  | Api.:Polyplicarum -related |
| Fig. 1 | C17_250P117_0239Tplate02_P2   | 389549566 | marine (*)          |     | marine sediment from shallow water hydrothermal system; Papua New Guinea     | Pacific Science 64 (3), 391-404 (2010)        | Vitrella brassicaformis    |
| Fig. 1 | CCI31                         | 27802552  | marine              | YES | oxygen-depleted marine env.; USA: Great Sippewisset salt marsh, Cape Cod, MA | Appl. Environ. Microbiol. 69(5),2657-63(2003) | Api.:Polyplicarum -related |
| Fig. 1 | CPSGM-1                       | 133778656 | marine              | YES | deep-sea methane cold seep sediment; Japan: Sagami Bay                       | Extremophiles 11 (4), 563-576 (2007)          | Unresolved: Api.           |
| Fig. 1 | 'Cryptosporidium struthionis' | 58371885  | animal feces/manure | YES | oocyst in Struthio camelus feces; Spain                                      | Unpublished                                   | Colpodella angusta         |
| Fig. 1 | 'Cryptosporidium sp.' NEV10   | 342918948 | animal feces/manure | YES | feces of calves with diarrhea; Turkey: Nevsehir                              | Unpublished                                   | Colpodella angusta         |
| Fig. 1 | D1P01G01                      | 118420045 | marine              | YES | oxygen-depleted intertidal marine sediment, upper 2 cm; Greenland: Arctic    | PLoS ONE 2(8): e728 (2007)                    | Api.:Polyplicarum -related |
| Fig. 1 | D1P01H03                      | 118420061 | marine              | YES | oxygen-depleted intertidal marine sediment, upper 2 cm; Greenland: Arctic    | PLoS ONE 2(8): e728 (2007)                    | Voromonas pontica          |
| Fig. 1 | D1P02A01                      | 118420063 | marine              | YES | oxygen-depleted intertidal marine sediment, upper 2 cm; Greenland: Arctic    | PLoS ONE 2(8): e728 (2007)                    | Api.:Polyplicarum -related |
| Fig. 1 | D1P02B08                      | 118420240 | marine              | YES | oxygen-depleted intertidal marine sediment, upper 2 cm; Greenland: Arctic    | PLoS ONE 2(8): e728 (2007)                    | Colpodella angusta         |
| Fig. 1 | D1P02C06                      | 118420241 | marine              | YES | oxygen-depleted intertidal marine sediment, upper 2 cm; Greenland: Arctic    | PLoS ONE 2(8): e728 (2007)                    | Api.:Polyplicarum -related |
| Fig. 1 | D1P02D12                      | 118420066 | marine              | YES | oxygen-depleted intertidal marine sediment, upper 2 cm; Greenland: Arctic    | PLoS ONE 2(8): e728 (2007)                    | Colpodella angusta         |
| Fig. 1 | D1P02E03                      | 118420067 | marine              | YES | oxygen-depleted intertidal marine sediment, upper 2 cm; Greenland: Arctic    | PLoS ONE 2(8): e728 (2007)                    | Env. clade VII             |
| Fig. 1 | D1P02F05                      | 118420046 | marine              | YES | oxygen-depleted intertidal marine sediment, upper 2 cm; Greenland: Arctic    | PLoS ONE 2(8): e728 (2007)                    | Api.:Polyplicarum -related |
| Fig. 1 | D2P03B10                      | 118420105 | marine              | YES | oxygen-depleted intertidal marine sediment, upper 2 cm; Greenland: Arctic    | PLoS ONE 2(8): e728 (2007)                    | Env. clade VII             |
| Fig. 1 | D2P03D02                      | 118420082 | marine              | YES | oxygen-depleted intertidal marine sediment, upper 2 cm; Greenland: Arctic    | PLoS ONE 2(8): e728 (2007)                    | Colpodella angusta         |
| Fig. 1 | D2P03D06                      | 118420106 | marine              | YES | oxygen-depleted intertidal marine sediment, upper 2 cm; Greenland: Arctic    | PLoS ONE 2(8): e728 (2007)                    | Env. clade I               |
| Fig. 1 | D2P03E11                      | 118420245 | marine              | YES | oxygen-depleted intertidal marine sediment, upper 2 cm; Greenland: Arctic    | PLoS ONE 2(8): e728 (2007)                    | Api.:Polyplicarum -related |
| Fig. 1 | D3P05C07                      | 118420125 | marine              | YES | oxygen-depleted intertidal marine sediment, upper 2 cm; Greenland: Arctic    | PLoS ONE 2(8): e728 (2007)                    | Env. clade XI              |
| Fig. 1 | D3P05F04                      | 118420152 | marine              | YES | oxygen-depleted intertidal marine sediment, upper 2 cm; Greenland: Arctic    | PLoS ONE 2(8): e728 (2007)                    | Env. clade VII             |
| Fig. 1 | D3P06B02                      | 118420161 | marine              | YES | oxygen-depleted intertidal marine sediment, upper 2 cm; Greenland: Arctic    | PLoS ONE 2(8): e728 (2007)                    | Env. clade XI              |
| Fig. 1 | D4P07B05                      | 118420253 | marine              | YES | oxygen-depleted intertidal marine sediment, upper 2 cm; Greenland: Arctic    | PLoS ONE 2(8): e728 (2007)                    | Env. clade VII             |
| Fig. 1 | D4P07C10                      | 118420192 | marine              | YES | oxygen-depleted intertidal marine sediment, upper 2 cm; Greenland: Arctic    | PLoS ONE 2(8): e728 (2007)                    | Env. clade XI              |
| Fig. 1 | D4P07G08                      | 118420173 | marine              | YES | oxygen-depleted intertidal marine sediment, upper 2 cm; Greenland: Arctic    | PLoS ONE 2(8): e728 (2007)                    | Env. clade I               |
| Fig. 1 | D4P07H09                      | 118420191 | marine              | YES | oxygen-depleted intertidal marine sediment, upper 2 cm; Greenland: Arctic    | PLoS ONE 2(8): e728 (2007)                    | Env. clade XI              |
| Fig. 1 | D4P08D06                      | 118420260 | marine              | YES | oxygen-depleted intertidal marine sediment, upper 2 cm; Greenland: Arctic    | PLoS ONE 2(8): e728 (2007)                    | Env. clade VII             |
| Fig. 1 | D4P08E10                      | 118420178 | marine              | YES | oxygen-depleted intertidal marine sediment, upper 2 cm; Greenland: Arctic    | PLoS ONE 2(8): e728 (2007)                    | Api.:Polyplicarum -related |
| Fig. 1 | D4P08E11                      | 118420179 | marine              | YES | oxygen-depleted intertidal marine sediment, upper 2 cm; Greenland: Arctic    | PLoS ONE 2(8): e728 (2007)                    | Env. clade I               |
| Fig. 1 | D4P08G08                      | 118420181 | marine              | YES | oxygen-depleted intertidal marine sediment, upper 2 cm; Greenland: Arctic    | PLoS ONE 2(8): e728 (2007)                    | Env. clade XI              |

|        |                             |           |                     |     |                                                                                |                                                 |                           |
|--------|-----------------------------|-----------|---------------------|-----|--------------------------------------------------------------------------------|-------------------------------------------------|---------------------------|
| Fig. 1 | D5P09C09                    | 118420206 | marine              | YES | oxygen-depleted intertidal marine sediment, upper 2 cm; Greenland: Arctic      | PLoS ONE 2(8): e728 (2007)                      | Colpodella angusta        |
| Fig. 1 | D5P10A10                    | 118420214 | marine              | YES | oxygen-depleted intertidal marine sediment, upper 2 cm; Greenland: Arctic      | PLoS ONE 2(8): e728 (2007)                      | Api.:Polyplicarum-related |
| Fig. 1 | D5P10D11                    | 118420226 | marine              | YES | oxygen-depleted intertidal marine sediment, upper 2 cm; Greenland: Arctic      | PLoS ONE 2(8): e728 (2007)                      | Env. clade VII            |
| Fig. 1 | D5P10G04                    | 118420223 | marine              | YES | oxygen-depleted intertidal marine sediment, upper 2 cm; Greenland: Arctic      | PLoS ONE 2(8): e728 (2007)                      | Colpodella angusta        |
| Fig. 1 | DGGE_gel_band_3mFR1L9B9     | 544587044 | animal feces/manure | YES | composting dairy manure                                                        | Unpublished                                     | Colpodella angusta        |
| Fig. 1 | DGGE_gel_band_3mFR11011     | 544587051 | animal feces/manure | YES | composting dairy manure                                                        | Unpublished                                     | Colpodella angusta        |
| Fig. 1 | He000427_15535              | 89572115  | marine              |     | marine sample; Germany: Helgoland                                              | Microb. Ecol. 52 (1), 53-71 (2006)              | Colpodella angusta        |
| Fig. 1 | He000427_20                 | 89572015  | marine              |     | marine sample; Germany: Helgoland                                              | Microb. Ecol. 52 (1), 53-71 (2006)              | Colpodella angusta        |
| Fig. 1 | dpeuk39                     | 60592951  | freshwater          | YES | freshwater anaerobic pond; USA: Zodlone Spring, Oklahoma                       | Appl. Environ. Microbiol. 71(10), 6175-84(2005) | Unresolved:Api. relatives |
| Fig. 1 | DSGM-12                     | 133778560 | marine              | YES | deep-sea methane cold seep sediment; Japan: Sagami Bay                         | Extremophiles 11 (4), 563-576 (2007)            | Unresolved: Api.          |
| Fig. 1 | DSGM-13                     | 133778561 | marine              | YES | deep-sea methane cold seep sediment; Japan: Sagami Bay                         | Extremophiles 11 (4), 563-576 (2007)            | Api.:Polyplicarum-related |
| Fig. 1 | DSGM-8                      | 133778556 | marine              | YES | deep-sea methane cold seep sediment; Japan: Sagami Bay                         | Extremophiles 11 (4), 563-576 (2007)            | Unresolved: Api.          |
| Fig. 1 | E08_250P220_0239Tplate03_P3 | 389549864 | marine (*)          |     | marine sediment from shallow water hydrothermal system; Papua New Guinea       | Pacific Science 64 (3), 391-404 (2010)          | Vitrella brassicaformis   |
| Fig. 1 | E12_180P126_0239Uplate02_P2 | 389549895 | marine (*)          |     | marine sediment from shallow water hydrothermal system; Papua New Guinea       | Pacific Science 64 (3), 391-404 (2010)          | Vitrella brassicaformis   |
| Fig. 1 | E1aD71                      | 168203738 | marine              |     | marine plankton; South China Sea, northern part                                | J. Plankton Res. 33 (3), 445-456 (2011)         | Voromonas pontica         |
| Fig. 1 | E6                          | 30144456  | marine              | YES | permanently anoxic deep-sea basin; Caribbean Sea: Cariaco Basin                | Appl. Environ. Microbiol. 69(9), 5656-63(2003)  | Api.:Polyplicarum-related |
| Fig. 1 | EBA140.9                    | 213058639 | freshwater          |     | freshwater lake; China                                                         | Acta Protozool. 48, 245-264 (2009)              | Env. clade II             |
| Fig. 1 | EBA43.25                    | 213058601 | freshwater          |     | freshwater lake; China                                                         | Acta Protozool. 48, 245-264 (2009)              | Env. clade IV             |
| Fig. 1 | EBA47.26                    | 213058602 | freshwater          |     | freshwater lake; China                                                         | Acta Protozool. 48, 245-264 (2009)              | Env. clade IV             |
| Fig. 1 | EBA52.36                    | 213058604 | freshwater          |     | freshwater lake; China                                                         | Acta Protozool. 48, 245-264 (2009)              | Env. clade IV             |
| Fig. 1 | EBA9.8                      | 213058584 | freshwater          |     | freshwater lake; China                                                         | Acta Protozool. 48, 245-264 (2009)              | Unresolved:Api. relatives |
| Fig. 1 | EBF1.128                    | 213058470 | freshwater          |     | freshwater lake; China                                                         | Acta Protozool. 48, 245-264 (2009)              | Env. clade IV             |
| Fig. 1 | EBF1.90                     | 213058469 | freshwater          |     | freshwater lake; China                                                         | Acta Protozool. 48, 245-264 (2009)              | Unresolved:Api. relatives |
| Fig. 1 | EBM3.51                     | 213058518 | freshwater          |     | freshwater lake; China                                                         | Acta Protozool. 48, 245-264 (2009)              | Unresolved:Api. relatives |
| Fig. 1 | EC12                        | 55831924  | animal feces/manure | YES | pig manure storage pit                                                         | FEMS Microbiol. Ecol. 52(2), 229-42(2005)       | Colpodella angusta        |
| Fig. 1 | EC54                        | 148743803 | animal feces/manure | YES | pig manure storage pit                                                         | FEMS Microbiol. Ecol. 52(2), 229-42(2005)       | Colpodella angusta        |
| Fig. 1 | EC67                        | 148743812 | animal feces/manure | YES | pig manure storage pit                                                         | FEMS Microbiol. Ecol. 52(2), 229-42(2005)       | Colpodella angusta        |
| Fig. 1 | elb6-t0-otu7                | 294829215 | freshwater          |     | ice-covered lake; Antarctica                                                   | ISME J 5, 1559-1564 (2011)                      | Unresolved:Api. relatives |
| Fig. 1 | Elev_18S_5171               | 166084485 | soil                |     | trembling aspen rhizosphere, elevated CO2 conditions; USA: UMBS, Michigan      | Environ. Microbiol. 10 (4), 926-941 (2008)      | Colpodella angusta        |
| Fig. 1 | ESS270706.033               | 299789590 | freshwater          |     | lake water filtered through 3 um from lake Esch sur Sure, depth 0m; Luxembourg | Unpublished                                     | Unresolved:Api. relatives |
| Fig. 1 | H11C09cA                    | 261290035 | marine (*)          |     | stromatolite (marine microbial mat); Bahamas: Highborne Cay                    | Environ. Microbiol. 11 (10), 2710-19 (2009)     | Vitrella brassicaformis   |
| Fig. 1 | He000427_1                  | 89572118  | marine              |     | marine sample; Germany: Helgoland                                              | Microb. Ecol. 52 (1), 53-71 (2006)              | Colpodella angusta        |
| Fig. 1 | I10_180P53_0239Rplate06_P6  | 389550613 | marine (*)          |     | marine sediment from shallow water hydrothermal system; Papua New Guinea       | Pacific Science 64 (3), 391-404 (2010)          | Vitrella brassicaformis   |
| Fig. 1 | I9S18K_ML_148               | 223034114 | freshwater          |     | Industrial Canal, water, greater than 3 micron; USA: New Orleans, LA           | Environ. Sci. Technol. 42(24), 9072-8(2008)     | Env. clade IV             |
| Fig. 1 | K1OCT2011                   | 430726581 | freshwater          |     | freshwater lake; Japan: Gunma, lake Kusaki                                     | Unpublished                                     | Env. clade IV             |

|        |                                |           |             |     |                                                                                     |                                             |                           |
|--------|--------------------------------|-----------|-------------|-----|-------------------------------------------------------------------------------------|---------------------------------------------|---------------------------|
| Fig. 1 | K2MAY2011                      | 430726574 | freshwater  |     | freshwater lake; Japan: Gunma, lake Kusaki                                          | Unpublished                                 | Env. clade IV             |
| Fig. 1 | K5AUG2009                      | 327247873 | freshwater  |     | freshwater lake; Japan: Gunma, lake Kusaki                                          | Unpublished                                 | Env. clade IV             |
| Fig. 1 | KRL01E25                       | 353255973 | freshwater  |     | freshwater lake; Greece: Lake Karla                                                 | ScientificWorldJournal 2012, 504135 (2012)  | Unresolved:Api. relatives |
| Fig. 1 | KRL03E03                       | 449890141 | freshwater  |     | freshwater lake; Greece: Lake Karla                                                 | ScientificWorldJournal 2012, 504135 (2012)  | Env. clade IV             |
| Fig. 1 | KRL03E57                       | 449890156 | freshwater  |     | freshwater lake; Greece: Lake Karla                                                 | Hydrobiologia 718, 73-83 (2013)             | Env. clade III            |
| Fig. 1 | KRL09E06                       | 449890170 | freshwater  |     | freshwater lake; Greece: Lake Karla                                                 | Hydrobiologia 718, 73-83 (2013)             | Env. clade III            |
| Fig. 1 | KRL09E21                       | 449890174 | freshwater  |     | freshwater lake; Greece: Lake Karla                                                 | Hydrobiologia 718, 73-83 (2013)             | Env. clade IV             |
| Fig. 1 | L07_250P64_023<br>9DSNP001F_P3 | 389551156 | marine (*)  |     | marine sediment from shallow water hydrothermal system; Papua New Guinea            | Pacific Science 64 (3), 391-404 (2010)      | Vitrella brassicaformis   |
| Fig. 1 | LG02-01                        | 60476886  | freshwater  |     | oligotrophic freshwater lake; USA: Lake George, Adirondack Park                     | Environ. Microbiol. 7 (9), 1413-1425 (2005) | Env. clade II             |
| Fig. 1 | LG05-01                        | 60476898  | freshwater  |     | oligotrophic freshwater lake; USA: Lake George, Adirondack Park                     | Environ. Microbiol. 7 (9), 1413-1425 (2005) | Env. clade II             |
| Fig. 1 | LG09-02                        | 60476916  | freshwater  |     | oligotrophic freshwater lake; USA: Lake George, Adirondack Park                     | Environ. Microbiol. 7 (9), 1413-1425 (2005) | Env. clade II             |
| Fig. 1 | LG25-01                        | 60476973  | freshwater  |     | oligotrophic freshwater lake; USA: Lake George, Adirondack Park                     | Environ. Microbiol. 7 (9), 1413-1425 (2005) | Env. clade II             |
| Fig. 1 | LG32-03                        | 60476996  | freshwater  |     | oligotrophic freshwater lake; USA: Lake George, Adirondack Park                     | Environ. Microbiol. 7 (9), 1413-1425 (2005) | Env. clade II             |
| Fig. 1 | LT19_H1                        | 529105019 | hypersaline |     | hypersaline lake; Australia: Lake Tyrrell, Victoria                                 | Front Microbiol 4, 115 (2013)               | Unresolved:Api. relatives |
| Fig. 1 | LT35_C14                       | 529105426 | hypersaline |     | hypersaline lake; Australia: Lake Tyrrell, Victoria                                 | Front Microbiol 4, 115 (2013)               | Unresolved:Api. relatives |
| Fig. 1 | LT37_G4                        | 529105789 | hypersaline |     | hypersaline lake; Australia: Lake Tyrrell, Victoria                                 | Front Microbiol 4, 115 (2013)               | Chromera velia            |
| Fig. 1 | LT41_e05_2                     | 529106034 | hypersaline |     | hypersaline lake; Australia: Lake Tyrrell, Victoria                                 | Front Microbiol 4, 115 (2013)               | Unresolved:Api. relatives |
| Fig. 1 | LT50_P1                        | 529106341 | hypersaline |     | hypersaline lake; Australia: Lake Tyrrell, Victoria                                 | Front Microbiol 4, 115 (2013)               | Unresolved:Api. relatives |
| Fig. 1 | LT62_D14                       | 529106413 | hypersaline |     | hypersaline lake; Australia: Lake Tyrrell, Victoria                                 | Front Microbiol 4, 115 (2013)               | Unresolved:Api. relatives |
| Fig. 1 | Mat131                         | 356459394 | marine (*)  | YES | anoxic sink; Gulf of Mexico: Jewfish Sink                                           | Hydrobiologia 677 (1), 65-87 (2011)         | Vitrella brassicaformis   |
| Fig. 1 | Mat140                         | 356459402 | marine (*)  | YES | anoxic sink; Gulf of Mexico: Jewfish Sink                                           | Hydrobiologia 677 (1), 65-87 (2011)         | Vitrella brassicaformis   |
| Fig. 1 | Mat179                         | 356459439 | marine (*)  | YES | anoxic sink; Gulf of Mexico: Jewfish Sink                                           | Hydrobiologia 677 (1), 65-87 (2011)         | Vitrella brassicaformis   |
| Fig. 1 | ML1_dino18S-9                  | 309753096 | freshwater  |     | 5 micron fraction of surface freshwater lake; USA: Connecticut, Storrs, Mirror Lake | PNAS 107 (46), 20033-38 (2010)              | Env. clade IV             |
| Fig. 1 | MLBA54.107                     | 213058446 | freshwater  |     | freshwater lake; China                                                              | Acta Protozool. 48, 245-264 (2009)          | Unresolved:Api. relatives |
| Fig. 1 | MLBA74.128                     | 213058464 | freshwater  |     | freshwater lake; China                                                              | Acta Protozool. 48, 245-264 (2009)          | Unresolved:Api. relatives |
| Fig. 1 | MLBM116.37                     | 213058384 | freshwater  |     | freshwater lake; China                                                              | Acta Protozool. 48, 245-264 (2009)          | Unresolved:Api. relatives |
| Fig. 1 | MPE1-2                         | 374532643 | freshwater  |     | aquatic moss pillars, lake; Antarctica: Skarvsnes, Hotoke-Ike lake                  | Polar Biol. 35, 1495-1504 (2012)            | Unresolved:Api. relatives |
| Fig. 1 | MPE1-46                        | 374532687 | freshwater  |     | aquatic moss pillars, lake; Antarctica: Skarvsnes, Hotoke-Ike lake                  | Polar Biol. 35, 1495-1504 (2012)            | Unresolved:Api. relatives |
| Fig. 1 | MPE2-2                         | 374532695 | freshwater  |     | aquatic moss pillars, lake; Antarctica: Skarvsnes, Hotoke-Ike lake                  | Polar Biol. 35, 1495-1504 (2012)            | Unresolved:Api. relatives |
| Fig. 1 | Out-556                        | 356459667 | marine      |     | anoxic sink; Gulf of Mexico: Jewfish Sink                                           | Hydrobiologia 677 (1), 65-87 (2011)         | Vitrella brassicaformis   |
| Fig. 1 | Out-623                        | 356459729 | marine      |     | anoxic sink; Gulf of Mexico: Jewfish Sink                                           | Hydrobiologia 677 (1), 65-87 (2011)         | Vitrella brassicaformis   |
| Fig. 1 | Out-678                        | 356459781 | marine      |     | anoxic sink; Gulf of Mexico: Jewfish Sink                                           | Hydrobiologia 677 (1), 65-87 (2011)         | Vitrella brassicaformis   |
| Fig. 1 | PAA22AU2004                    | 82470184  | freshwater  |     | deep freshwater meromictic lake; France: Lake Pavin, Massif Central                 | Environ. Microbiol. 9 (1), 61-71 (2007)     | Env. clade IV             |
| Fig. 1 | PAF8AU2004                     | 82470188  | freshwater  |     | deep freshwater meromictic lake; France: Lake Pavin, Massif Central                 | Environ. Microbiol. 9 (1), 61-71 (2007)     | Unresolved:Api. relatives |
| Fig. 1 | PC04.G3_Pla_1                  | 393405643 | freshwater  |     | high mountain lake; Spain: Pyrenees, Lake Plan                                      | Environ. Microbiol. 14 (9), 2445-56 (2012)  | Env. clade II             |
| Fig. 1 | PC05.B12_Ger_1<br>2            | 393405440 | freshwater  |     | high mountain lake; Spain: Pyrenees, Lake Plan                                      | Environ. Microbiol. 14 (9), 2445-56 (2012)  | Env. clade II             |
| Fig. 1 | PC05.F10_Ger_1                 | 393405443 | freshwater  |     | high mountain lake; Spain: Pyrenees, Lake Plan                                      | Environ. Microbiol. 14 (9), 2445-56 (2012)  | Env. clade II             |

|        |               |           |            |                                                             |                                            |                            |
|--------|---------------|-----------|------------|-------------------------------------------------------------|--------------------------------------------|----------------------------|
| Fig. 1 | PC06.B8_Ger_1 | 393405451 | freshwater | high mountain lake; Spain: Pyrenees, Lake Plan              | Environ. Microbiol. 14 (9), 2445-56 (2012) | Env. clade II              |
| Fig. 1 | PC06.D4_Ger_9 | 393405454 | freshwater | high mountain lake; Spain: Pyrenees, Lake Plan              | Environ. Microbiol. 14 (9), 2445-56 (2012) | Env. clade II              |
| Fig. 1 | PC06.H4_Ger_6 | 393405472 | freshwater | high mountain lake; Spain: Pyrenees, Lake Plan              | Environ. Microbiol. 14 (9), 2445-56 (2012) | Env. clade II              |
| Fig. 1 | Pink_A01      | 300088886 | marine (*) | intertidal thrombolites; Bahamas: Highborne Cay             | Geobiology 8 (4), 337-354 (2010)           | Vitrella brassicaformis    |
| Fig. 1 | Pink_C09      | 300088917 | marine (*) | intertidal thrombolites; Bahamas: Highborne Cay             | Geobiology 8 (4), 337-354 (2010)           | Vitrella brassicaformis    |
| Fig. 1 | Pink_D06      | 300088926 | marine (*) | intertidal thrombolites; Bahamas: Highborne Cay             | Geobiology 8 (4), 337-354 (2010)           | Vitrella brassicaformis    |
| Fig. 1 | Pink_D07      | 300088927 | marine (*) | intertidal thrombolites; Bahamas: Highborne Cay             | Geobiology 8 (4), 337-354 (2010)           | Vitrella brassicaformis    |
| Fig. 1 | Pink_D12      | 300088932 | marine (*) | intertidal thrombolites; Bahamas: Highborne Cay             | Geobiology 8 (4), 337-354 (2010)           | Vitrella brassicaformis    |
| Fig. 1 | Pink_E09      | 300088940 | marine (*) | intertidal thrombolites; Bahamas: Highborne Cay             | Geobiology 8 (4), 337-354 (2010)           | Vitrella brassicaformis    |
| Fig. 1 | Pink_E10      | 300088941 | marine (*) | intertidal thrombolites; Bahamas: Highborne Cay             | Geobiology 8 (4), 337-354 (2010)           | Vitrella brassicaformis    |
| Fig. 1 | Pink_F04      | 300088947 | marine (*) | intertidal thrombolites; Bahamas: Highborne Cay             | Geobiology 8 (4), 337-354 (2010)           | Vitrella brassicaformis    |
| Fig. 1 | Pink_F05      | 300088948 | marine (*) | intertidal thrombolites; Bahamas: Highborne Cay             | Geobiology 8 (4), 337-354 (2010)           | Vitrella brassicaformis    |
| Fig. 1 | Pink_F11      | 300088953 | marine (*) | intertidal thrombolites; Bahamas: Highborne Cay             | Geobiology 8 (4), 337-354 (2010)           | Vitrella brassicaformis    |
| Fig. 1 | Pink_G07      | 300088960 | marine (*) | intertidal thrombolites; Bahamas: Highborne Cay             | Geobiology 8 (4), 337-354 (2010)           | Vitrella brassicaformis    |
| Fig. 1 | Pink_G11      | 300088964 | marine (*) | intertidal thrombolites; Bahamas: Highborne Cay             | Geobiology 8 (4), 337-354 (2010)           | Vitrella brassicaformis    |
| Fig. 1 | PR2_3E_116    | 316926548 | freshwater | water from Praz Rodet peat bog; Switzerland: Jura Mountains | Protist 162, 14–32 (2011)                  | Unresolved: Api.           |
| Fig. 1 | PR2_3E_74     | 299778455 | freshwater | water from Praz Rodet peat bog; Switzerland: Jura Mountains | Protist 162, 14–32 (2011)                  | Unresolved: Api. relatives |
| Fig. 1 | PR3_4E_33     | 299778456 | freshwater | water from Praz Rodet peat bog; Switzerland: Jura Mountains | Protist 162, 14–32 (2011)                  | Env. clade VI              |
| Fig. 1 | PS13A10       | 262357995 | marine (*) | Lakshwadeep coral reef sand; Arabian Sea                    | FEMS Microbiol. Ecol. 71(3),399–412(2010)  | Vitrella brassicaformis    |
| Fig. 1 | PS13C9        | 262358012 | marine (*) | Lakshwadeep coral reef sand; Arabian Sea                    | FEMS Microbiol. Ecol. 71(3),399–412(2010)  | Vitrella brassicaformis    |
| Fig. 1 | PS13D9        | 262358015 | marine (*) | Lakshwadeep coral reef sand; Arabian Sea                    | FEMS Microbiol. Ecol. 71(3),399–412(2010)  | Vitrella brassicaformis    |
| Fig. 1 | SB16_2010     | 387912501 | freshwater | water purification plant; Japan:Gunma, Kiryu                | Unpublished                                | Voromonas pontica          |
| Fig. 1 | SB19_2010     | 387912504 | freshwater | water purification plant; Japan:Gunma, Kiryu                | Unpublished                                | Chromera velia             |
| Fig. 1 | SB21_2010     | 387912506 | freshwater | water purification plant; Japan:Gunma, Kiryu                | Unpublished                                | Unresolved: Api. relatives |
| Fig. 1 | SB7_2010      | 387912492 | freshwater | water purification plant; Japan:Gunma, Kiryu                | Unpublished                                | Unresolved: Api. relatives |
| Fig. 1 | SC8051102_25  | 225548510 | freshwater | freshwater reservoir; South Korea: Sangcheon reservoir      | J. Microbiol. Methods 81 (1), 61-68 (2010) | Unresolved: Api. relatives |
| Fig. 1 | SEO81101_35   | 225548493 | freshwater | freshwater reservoir; South Korea: Seoho reservoir          | J. Microbiol. Methods 81 (1), 61-68 (2010) | Env. clade IV              |
| Fig. 1 | SEO81107_36   | 225548503 | freshwater | freshwater reservoir; South Korea: Seoho reservoir          | J. Microbiol. Methods 81 (1), 61-68 (2010) | Env. clade IV              |
| Fig. 1 | Sey061        | 49356800  | freshwater | river sediment; Switzerland: Seymaz River, Geneva           | BMC Biol. 2, 13 (2004)                     | Env. clade VII             |
| Fig. 1 | TB4-1         | 259906333 | freshwater | freshwater lake; China: Lake Taihu                          | FEMS Microbiol. Ecol. 74 (1), 19-31 (2010) | Unresolved: Api. relatives |
| Fig. 1 | TB4-15        | 259906347 | freshwater | freshwater lake; China: Lake Taihu                          | FEMS Microbiol. Ecol. 74 (1), 19-31 (2010) | Unresolved: Api. relatives |
| Fig. 1 | TB4-24        | 259906354 | freshwater | freshwater lake; China: Lake Taihu                          | FEMS Microbiol. Ecol. 74 (1), 19-31 (2010) | Unresolved: Api. relatives |
| Fig. 1 | TB4-27        | 259906357 | freshwater | freshwater lake; China: Lake Taihu                          | FEMS Microbiol. Ecol. 74 (1), 19-31 (2010) | Unresolved: Api. relatives |
| Fig. 1 | TB4-39        | 259906369 | freshwater | freshwater lake; China: Lake Taihu                          | FEMS Microbiol. Ecol. 74 (1), 19-31 (2010) | Unresolved: Api. relatives |
| Fig. 1 | TB4-43        | 259906371 | freshwater | freshwater lake; China: Lake Taihu                          | FEMS Microbiol. Ecol. 74 (1), 19-31 (2010) | Unresolved: Api. relatives |



|         |           |           |            |                                                                                        |                                            |                             |
|---------|-----------|-----------|------------|----------------------------------------------------------------------------------------|--------------------------------------------|-----------------------------|
| Fig. 1  | TB4-44    | 259906372 | freshwater | freshwater lake; China: Lake Taihu                                                     | FEMS Microbiol. Ecol. 74 (1), 19-31 (2010) | Unresolved:Api. relatives   |
| Fig. 1  | TB4-45    | 259906373 | freshwater | freshwater lake; China: Lake Taihu                                                     | FEMS Microbiol. Ecol. 74 (1), 19-31 (2010) | Unresolved:Api. relatives   |
| Fig. 1  | TB4-48    | 259906376 | freshwater | freshwater lake; China: Lake Taihu                                                     | FEMS Microbiol. Ecol. 74 (1), 19-31 (2010) | Unresolved:Api. relatives   |
| Fig. 1  | TB4-51    | 259906379 | freshwater | freshwater lake; China: Lake Taihu                                                     | FEMS Microbiol. Ecol. 74 (1), 19-31 (2010) | Unresolved:Api. relatives   |
| Fig. 1  | V10-5     | 355346671 | freshwater | freshwater reservoir; France, Villerest reservoir                                      | Unpublished                                | Env. clade IV               |
| Fig. 1  | VP1       | 100289290 | freshwater | lacustrine community in hyper-eutrophic conditions; France, Villerest reservoir        | FEMS Microbiol. Ecol. 61(3), 483-95(2007)  | Unresolved:Api. relatives   |
| Fig. 1  | WD0-1     | 259906092 | freshwater | freshwater lake; China: Lake Taihu                                                     | FEMS Microbiol. Ecol. 74 (1), 19-31 (2010) | Env. clade II               |
| Fig. 1  | WD0-50    | 259906128 | freshwater | freshwater lake; China: Lake Taihu                                                     | FEMS Microbiol. Ecol. 74 (1), 19-31 (2010) | Env. clade IV               |
| Fig. 1  | WD4-1     | 259906134 | freshwater | freshwater lake; China: Lake Taihu                                                     | FEMS Microbiol. Ecol. 74 (1), 19-31 (2010) | Unresolved:Api. relatives   |
| Fig. 1  | WD4-110   | 259906236 | freshwater | freshwater lake; China: Lake Taihu                                                     | FEMS Microbiol. Ecol. 74 (1), 19-31 (2010) | Unresolved:Api. relatives   |
| Fig. 1  | WD4-128   | 259906254 | freshwater | freshwater lake; China: Lake Taihu                                                     | FEMS Microbiol. Ecol. 74 (1), 19-31 (2010) | Unresolved:Api. relatives   |
| Fig. 1  | WD4-138   | 259906264 | freshwater | freshwater lake; China: Lake Taihu                                                     | FEMS Microbiol. Ecol. 74 (1), 19-31 (2010) | Unresolved:Api. relatives   |
| Fig. 1  | WD4-66    | 259906196 | freshwater | freshwater lake; China: Lake Taihu                                                     | FEMS Microbiol. Ecol. 74 (1), 19-31 (2010) | Unresolved:Api. relatives   |
| Fig. 1  | WD4-80    | 259906208 | freshwater | freshwater lake; China: Lake Taihu                                                     | FEMS Microbiol. Ecol. 74 (1), 19-31 (2010) | Unresolved:Api. relatives   |
| Fig. S2 | P107t1c1  | KP213181  | soil       | soil from UBC endowment lands; Canada: Vancouver                                       | THIS STUDY                                 | Api.:Terrestrial gregarines |
| Fig. S2 | P107t1c3  | KP213183  | soil       | soil from UBC endowment lands; Canada: Vancouver                                       | THIS STUDY                                 | Api.:Terrestrial gregarines |
| Fig. S2 | P108t7c5  | KP213189  | soil       | soil from UBC endowment lands; Canada: Vancouver                                       | THIS STUDY                                 | Api.:Terrestrial gregarines |
| Fig. S2 | P108t7c6  | KP213190  | soil       | soil from UBC endowment lands; Canada: Vancouver                                       | THIS STUDY                                 | Api.:Terrestrial gregarines |
| Fig. S2 | P109t5c6  | KP213193  | marine     | coral <i>Porites compressa</i> ; USA: Birch Aquarium, San Diego, CA                    | THIS STUDY                                 | Api.: genotype N            |
| Fig. S2 | P113t16c1 | KP213194  | marine     | Coral 3, identified as <i>Seriatopora hystrix</i> ; USA: Birch Aquarium, San Diego, CA | THIS STUDY                                 | Api.: genotype N            |
| Fig. S2 | P114t13c1 | KP213198  | marine     | coral <i>Acropora yongei</i> ; USA: Birch Aquarium, San Diego, CA                      | THIS STUDY                                 | Api.:Terrestrial gregarines |
| Fig. S2 | P114t13c2 | KP213199  | marine     | coral <i>Acropora yongei</i> ; USA: Birch Aquarium, San Diego, CA                      | THIS STUDY                                 | Api.:Terrestrial gregarines |
| Fig. S2 | P114t9c2  | KP213201  | marine     | mucus from <i>Acropora yongei</i> ; USA: Birch Aquarium, San Diego, CA                 | THIS STUDY                                 | Api.:Terrestrial gregarines |
| Fig. S2 | P116t17c4 | KP213205  | marine     | Coral 3, identified as <i>Seriatopora hystrix</i> ; USA: Birch Aquarium, San Diego, CA | THIS STUDY                                 | Api.: genotype N            |
| Fig. S2 | P116t17c5 | KP213206  | marine     | Coral 3, identified as <i>Seriatopora hystrix</i> ; USA: Birch Aquarium, San Diego, CA | THIS STUDY                                 | Api.: Sarcocystids          |
| Fig. S2 | P116t7c3  | KP213210  | marine     | coral <i>Seriatopora hystrix</i> ; USA: Birch Aquarium, San Diego, CA                  | THIS STUDY                                 | Api.: genotype N            |
| Fig. S2 | P57t7c1   | KP213223  | soil       | soil from UBC endowment lands; Canada: Vancouver                                       | THIS STUDY                                 | Api.:Terrestrial gregarines |
| Fig. S2 | P57t7c10  | KP213224  | soil       | soil from UBC endowment lands; Canada: Vancouver                                       | THIS STUDY                                 | Api.:Terrestrial gregarines |
| Fig. S2 | P57t7c3   | KP213225  | soil       | soil from UBC endowment lands; Canada: Vancouver                                       | THIS STUDY                                 | Api.:Terrestrial gregarines |
| Fig. S2 | P57t7c9   | KP213225  | soil       | soil from UBC endowment lands; Canada: Vancouver                                       | THIS STUDY                                 | Api.:Terrestrial gregarines |
| Fig. S2 | P87t2c4   | KP213237  | soil       | soil from UBC endowment lands; Canada: Vancouver                                       | THIS STUDY                                 | Api.:Terrestrial gregarines |
| Fig. S2 | P87t5c3b  | KP213244  | marine     | Damp woodchip and surface sand; Canada: Locarno Beach, Vancouver, BC                   | THIS STUDY                                 | Api.:Terrestrial gregarines |
| Fig. S2 | P91t3c1   | KP213248  | marine     | coral <i>Porites astreoides</i> ; USA: Birch Aquarium, San Diego, CA                   | THIS STUDY                                 | Api.:Terrestrial gregarines |
| Fig. S2 | P91t3c4   | KP213249  | marine     | coral <i>Porites astreoides</i> ; USA: Birch Aquarium, San Diego, CA                   | THIS STUDY                                 | Api.:Terrestrial gregarines |
| Fig. S2 | P91t4c2   | KP213250  | marine     | coral <i>Porites compressa</i> ; USA: Birch Aquarium, San Diego, CA                    | THIS STUDY                                 | Api.: genotype N            |

|         |         |          |            |                                                                             |            |                              |
|---------|---------|----------|------------|-----------------------------------------------------------------------------|------------|------------------------------|
| Fig. S2 | P97t5c5 | KP213257 | freshwater | Freshwater duck pond near the beach; Canada: Boundary Bay, BC               | THIS STUDY | Api.: Terrestrial gregarines |
| Fig. S2 | P97t3c2 | KP213252 | marine     | Damp mid-beach sand under broken shell and debris; Canada: Boundary Bay, BC | THIS STUDY | Api.: Eimeriids              |
| Fig. S2 | P97t3c3 | KP213253 | marine     | Damp mid-beach sand under broken shell and debris; Canada: Boundary Bay, BC | THIS STUDY | Api.: Eimeriids              |
| Fig. S2 | P97t3c4 | KP213254 | marine     | Damp mid-beach sand under broken shell and debris; Canada: Boundary Bay, BC | THIS STUDY | Api.: Eimeriids              |
| Fig. S2 | P97t3c5 | KP213255 | marine     | Damp mid-beach sand under broken shell and debris; Canada: Boundary Bay, BC | THIS STUDY | Api.: Eimeriids              |

<sup>1</sup> Marine, CaCO<sub>3</sub>-dominated environments specifically associated with sequences from the *Vitrella brassicaformis* clade are indicated by the (\*) symbol. These include coral reef sediment (Arabian Sea), thrombolites and stromatolites at Higborne Cay (Bahamas), CaCO<sub>3</sub>-precipitating sink off the coast of Florida, and coastal carbonate sediment in Papua New Guinea. See the respective publications for further details.

<sup>2</sup> Low oxygen environment (anoxic or microaerophilic)

<sup>3</sup> THIS STUDY = sequences generated in this study by apicomplexan-specific primers

<sup>4</sup> Based on Fig. 1; Env. = Environmental; Api. = Apicomplexa

**Table S2: Abbreviations and full names of proteins and pathways used in Fig. 3.**

| Pathway                                                                                           | Localization                                                                     | Short names                                               | E.C.                                                | Protein name                                            |                                                          |                                               |                                          |
|---------------------------------------------------------------------------------------------------|----------------------------------------------------------------------------------|-----------------------------------------------------------|-----------------------------------------------------|---------------------------------------------------------|----------------------------------------------------------|-----------------------------------------------|------------------------------------------|
| Isoprenoid precursor biosynthesis (Isopentenyl diphosphate= IPP/ Dimethylallyl diphosphate= DMAP) | Cytosolic (mevalonate pathway = MEV)                                             | HMGCS                                                     | 2.3.3.10                                            | hydroxymethylglutaryl-CoA synthase                      |                                                          |                                               |                                          |
|                                                                                                   |                                                                                  | HMGCR                                                     | 1.1.1.34                                            | hydroxymethylglutaryl-CoA reductase                     |                                                          |                                               |                                          |
|                                                                                                   |                                                                                  | MVK                                                       | 2.7.1.36                                            | mevalonate kinase                                       |                                                          |                                               |                                          |
|                                                                                                   | Plastidic (non-mevalonate pathway = MEP/DOXP)                                    |                                                           | PMVK                                                | 2.7.4.2                                                 | phosphomevalonate kinase                                 |                                               |                                          |
|                                                                                                   |                                                                                  |                                                           | MVD                                                 | 4.1.1.33                                                | diphosphomevalonate decarboxylase                        |                                               |                                          |
|                                                                                                   |                                                                                  |                                                           | DXS                                                 | 2.2.1.7                                                 | 1-deoxy-D-xylulose-5-phosphate synthase                  |                                               |                                          |
|                                                                                                   |                                                                                  |                                                           | IspC                                                | 1.1.1.267                                               | 1-deoxy-D-xylulose-5-phosphate reductoisomerase          |                                               |                                          |
|                                                                                                   |                                                                                  |                                                           | IspD                                                | 2.7.7.60                                                | 2-C-methyl-D-erythritol 4-phosphate cytidyltransferase   |                                               |                                          |
|                                                                                                   |                                                                                  |                                                           | IspE                                                | 2.7.1.148                                               | 4-diphosphocytidyl-2-C-methyl-D-erythritol kinase        |                                               |                                          |
|                                                                                                   |                                                                                  |                                                           | IspF                                                | 4.6.1.12                                                | 2-C-methyl-D-erythritol 2,4-cyclodiphosphate synthase    |                                               |                                          |
|                                                                                                   |                                                                                  |                                                           | IspG                                                | 1.17.7.1                                                | (E)-4-hydroxy-3-methylbut-2-enyl-diphosphate synthase    |                                               |                                          |
|                                                                                                   |                                                                                  |                                                           | IspH (LytB)                                         | 1.17.1.2                                                | 4-hydroxy-3-methylbut-2-enyl diphosphate reductase       |                                               |                                          |
|                                                                                                   |                                                                                  |                                                           | Tetrapyrrole biosynthesis (heme, chlorophyll, etc.) | Mitochondrial (C4 pathway)                              | ALAS                                                     | 2.3.1.37                                      | 5-aminolevulinatase synthase             |
| ALAD (HemB)                                                                                       | 4.2.1.24                                                                         | 5-aminolevulinatase dehydratase/ porphobilinogen synthase |                                                     |                                                         |                                                          |                                               |                                          |
| PBGD (HemC)                                                                                       | 2.5.1.61                                                                         | porphobilinogen deaminase hydroxymethylbilane synthase    |                                                     |                                                         |                                                          |                                               |                                          |
| Cytosolic/ Mitochondrial (C4 pathway) or Plastidic (C5 pathway)                                   |                                                                                  | UROS (HemD)                                               |                                                     | 4.2.1.75                                                | uroporphyrinogen-III synthase                            |                                               |                                          |
|                                                                                                   |                                                                                  | UROD (HemE)                                               |                                                     | 4.1.1.37                                                | uroporphyrinogen decarboxylase                           |                                               |                                          |
|                                                                                                   |                                                                                  | CPOX (HemF)                                               |                                                     | 1.3.3.3                                                 | coproporphyrinogen III oxidase                           |                                               |                                          |
|                                                                                                   |                                                                                  | PPOX (HemY)                                               |                                                     | 1.3.3.4                                                 | protoporphyrinogen oxidase                               |                                               |                                          |
|                                                                                                   |                                                                                  | FECH (HemH)                                               |                                                     | 4.99.1.1                                                | ferrochelatase                                           |                                               |                                          |
|                                                                                                   |                                                                                  | Plastidic (C5 pathway)                                    |                                                     |                                                         | GTS (HemA)                                               | 1.2.1.70                                      | glutamyl-tRNA reductase                  |
|                                                                                                   |                                                                                  |                                                           |                                                     |                                                         | GTR (HemL)                                               | 5.4.3.8                                       | glutamate-1-semialdehyde 2,1-aminomutase |
| FAAL                                                                                              | 2.3.1.86                                                                         |                                                           |                                                     |                                                         | fatty acid synthase type I, fatty acyl-AMP ligase domain |                                               |                                          |
| Fatty acid biosynthesis and elongation                                                            | Cytosolic (polyketide synthase/ fatty acid synthase type I pathway = PKSII/FASI) | KS                                                        |                                                     | 2.3.1.86                                                | fatty acid synthase type I, ketoacyl synthase domain     |                                               |                                          |
|                                                                                                   |                                                                                  | AT                                                        |                                                     | 2.3.1.86                                                | fatty acid synthase type I, acyl transferase domain      |                                               |                                          |
|                                                                                                   |                                                                                  | DH                                                        | 2.3.1.86                                            | fatty acid synthase type I, dehydrase domain            |                                                          |                                               |                                          |
|                                                                                                   |                                                                                  | ER                                                        | 2.3.1.86                                            | fatty acid synthase type I, enoyl reductase domain      |                                                          |                                               |                                          |
|                                                                                                   |                                                                                  | KR                                                        | 2.3.1.86                                            | fatty acid synthase type I, ketoacyl reductase domain   |                                                          |                                               |                                          |
|                                                                                                   |                                                                                  | ACP                                                       | 2.3.1.86                                            | fatty acid synthase type I, acyl carrier protein domain |                                                          |                                               |                                          |
|                                                                                                   |                                                                                  | SDR                                                       | 2.3.1.86                                            | fatty acid synthase type I, terminal reductase domain   |                                                          |                                               |                                          |
|                                                                                                   |                                                                                  | Endoplasmic reticulum (ER) fatty acid elongation pathway) |                                                     | ELO                                                     | 2.3.1.199                                                | beta-ketoacyl-CoA synthase                    |                                          |
|                                                                                                   |                                                                                  |                                                           |                                                     | KCR                                                     | 1.1.1.330                                                | beta-ketoacyl-CoA reductase                   |                                          |
|                                                                                                   |                                                                                  |                                                           |                                                     | PHS                                                     | 4.2.1.134                                                | beta-hydroxyacyl-CoA dehydratase              |                                          |
|                                                                                                   |                                                                                  |                                                           |                                                     | TECR                                                    | 1.3.1.93                                                 | trans-2-enoyl-CoA reductase                   |                                          |
|                                                                                                   |                                                                                  |                                                           |                                                     | FabD                                                    | 2.3.1.39                                                 | malonyl-CoA-acyl carrier protein transacylase |                                          |
|                                                                                                   |                                                                                  |                                                           |                                                     | FabG                                                    | 1.1.1.100                                                | beta-ketoacyl-acyl carrier protein reductase  |                                          |
|                                                                                                   | FabH                                                                             |                                                           |                                                     | 2.3.1.180                                               | beta-ketoacyl-acyl carrier protein synthase III          |                                               |                                          |
|                                                                                                   | Plastidic (fatty acid synthase type II pathway = FASII)                          |                                                           | FabZ                                                | 4.2.1.59                                                | D-3-hydroxyoctanoyl-acyl carrier protein dehydratase     |                                               |                                          |
|                                                                                                   |                                                                                  |                                                           | FabI                                                | 1.3.1.9                                                 | enoyl acyl carrier protein reductase                     |                                               |                                          |
|                                                                                                   |                                                                                  |                                                           | FabB/F                                              | 2.3.1.41                                                | beta-ketoacyl-acyl carrier protein synthetase            |                                               |                                          |
|                                                                                                   |                                                                                  |                                                           | ACP                                                 |                                                         | acyl-carrier protein                                     |                                               |                                          |
|                                                                                                   |                                                                                  |                                                           | SufB                                                |                                                         | cysteine desulfurase activator complex subunit SufB      |                                               |                                          |
|                                                                                                   |                                                                                  |                                                           | ClpC                                                |                                                         | ATP-dependent Clp protease ATP-binding subunit ClpC      |                                               |                                          |
| Other functions                                                                                   | Plastidic (plastid-encoded)                                                      | Ycf93                                                     |                                                     | plastid membrane protein of unknown function            |                                                          |                                               |                                          |

**Table S3: Chromodellid plastidic proteins with complete N-terminal sequence.**

| Chromodellid species | Short name | Contig/Protein reference | SP <sup>1</sup> | SP score <sup>1</sup> | SP length <sup>1</sup> | CTP <sup>2</sup> | CTP score <sup>2</sup> | CTP length <sup>2</sup> |
|----------------------|------------|--------------------------|-----------------|-----------------------|------------------------|------------------|------------------------|-------------------------|
| Alphamonas edax BE-2 | FabF       | a7716_61_4_2_1591        | Y               | 0.81                  | 23                     |                  | 0.46                   | 16                      |
| Alphamonas edax BE-2 | FabG       | a22551_86_13_1248_259    | Y               | 0.9                   | 24                     |                  | 0.49                   | 38                      |

|                          |      |                                 |   |      |    |   |      |    |
|--------------------------|------|---------------------------------|---|------|----|---|------|----|
| Alphamonas edax BE-2     | FabZ | a263933_12_2_2_448              | Y | 0.88 | 20 |   | 0.47 | 35 |
| Alphamonas edax BE-2     | SufE | a110568_24_3_80_688             | Y | 0.94 | 20 | Y | 0.52 | 34 |
| Chromera velia           | ALAD | MMETSP0290_20130426_17951_1_402 | Y | 0.55 | 15 | Y | 0.55 | 47 |
| Chromera velia           | ClpC | MMETSP0290_20130426_3091_1_1013 | Y | 0.76 | 18 | Y | 0.56 | 92 |
| Chromera velia           | CPOX | MMETSP0290_20130426_4127_1_409  | Y | 0.8  | 17 | Y | 0.53 | 36 |
| Chromera velia           | CPOX | MMETSP0290_20130426_4154_1_411  | Y | 0.7  | 23 |   | 0.49 | 51 |
| Chromera velia           | FabD | MMETSP0290_20130426_21839_1_349 | Y | 0.85 | 19 | Y | 0.51 | 35 |
| Chromera velia           | FabF | MMETSP0290_20130426_1976_1_463  | Y | 0.59 | 19 | Y | 0.55 | 51 |
| Chromera velia           | FabG | MMETSP0290_20130426_20062_1_308 | Y | 0.88 | 18 |   | 0.49 | 54 |
| Chromera velia           | FabH | MMETSP0290_20130426_17765_1_393 | Y | 0.77 | 21 | Y | 0.55 | 57 |
| Chromera velia           | FabI | MMETSP0290_20130426_14303_1_355 | Y | 0.82 | 19 | Y | 0.54 | 38 |
| Chromera velia           | FabZ | MMETSP0290_20130426_4631_1_213  | Y | 0.89 | 17 |   | 0.49 | 54 |
| Chromera velia           | Fdx  | MMETSP0290_20130426_1982_1_149  | Y | 0.75 | 15 | Y | 0.54 | 50 |
| Chromera velia           | FECH | MMETSP0290_20130426_5910_1_460  | Y | 0.79 | 33 | Y | 0.51 | 63 |
| Chromera velia           | IspD | MMETSP0290_20130426_22696_1     | Y | 0.82 | 19 | Y | 0.51 | 64 |
| Chromera velia           | IspE | MMETSP0290_20130426_14275_1     | Y | 0.8  | 18 | Y | 0.57 | 53 |
| Chromera velia           | PBGD | MMETSP0290_20130426_12195_1_411 | Y | 0.85 | 18 | Y | 0.57 | 56 |
| Chromera velia           | PPOX | MMETSP0290_20130426_18890_1_615 | Y | 0.58 | 19 | Y | 0.52 | 15 |
| Chromera velia           | SufB | MMETSP029020130426_15825_1_566  | Y | 0.7  | 18 |   | 0.48 | 25 |
| Chromera velia           | SufS | contig12900_JO801918_blast_full | Y | 0.72 | 19 | Y | 0.5  | 34 |
| Chromera velia           | UROS | MMETSP0290_20130426_22563_1_399 | Y | 0.48 | 17 | Y | 0.52 | 24 |
| Colpodella angusta BE-6  | ALAD | a1810_243_9_1431_172            | Y | 0.65 | 19 |   | 0.45 | 14 |
| Colpodella angusta BE-6  | CPOX | a5011_127_9_1611_262            | Y | 0.76 | 19 |   | 0.44 | 13 |
| Colpodella angusta BE-6  | Fdx  | a63516_19_2_1_489               | Y | 0.7  | 15 |   | 0.44 | 14 |
| Colpodella angusta BE-6  | FECH | a17545_33_13_1312_44            | Y | 0.73 | 17 |   | 0.5  | 16 |
| Colpodella angusta BE-6  | PPOX | a34610_19_5_1_1764              | Y | 0.7  | 25 |   | 0.45 | 20 |
| Colpodella angusta BE-6  | SufB | a7216_97_2_21570                | Y | 0.74 | 19 |   | 0.43 | 15 |
| Colpodella angusta BE-6  | SufC | a30602_28_6_898_62              | Y | 0.61 | 15 |   | 0.43 | 26 |
| Colpodella angusta BE-6  | UROD | a13302_39_9_1650_67             | Y | 0.54 | 22 |   | 0.47 | 40 |
| Colpodella angusta Spi-2 | FNR  | a13692_81_9_976_65              | Y | 0.58 | 22 |   | 0.45 | 19 |
| Colpodella angusta Spi-2 | IspC | a44398_21_7_1598_168            | Y | 0.8  | 20 |   | 0.47 | 57 |
| Colpodella angusta Spi-2 | IspD | a18350_62_2_44_820              | Y | 0.62 | 18 |   | 0.44 | 25 |
| Colpodella angusta Spi-2 | IspE | a31756_25_7_1128_46             | Y | 0.72 | 16 |   | 0.44 | 26 |
| Colpodella angusta Spi-2 | PBGD | a53819_34_11_1198_62            | Y | 0.81 | 21 |   | 0.45 | 6  |
| Vitrella brassicaformis  | ClpC | MMETSP0290_20130426_10413_1_925 | Y | 0.58 | 19 | Y | 0.51 | 74 |
| Vitrella brassicaformis  | CPOX | MMETSP0290_20130426_65767_1_398 | Y | 0.83 | 19 |   | 0.48 | 41 |
| Vitrella brassicaformis  | CPOX | MMETSP0290_20130426_28340_1_400 | Y | 0.82 | 23 | Y | 0.51 | 71 |
| Vitrella brassicaformis  | DXS  | MMETSP0290_20130426_5902_1      | Y | 0.87 | 19 | Y | 0.55 | 73 |
| Vitrella brassicaformis  | FabG | MMETSP0290_20130426_48423_1_305 | Y | 0.82 | 24 | Y | 0.54 | 47 |
| Vitrella brassicaformis  | FabZ | MMETSP0290_20130426_8033_1_242  | Y | 0.7  | 22 | Y | 0.55 | 67 |
| Vitrella brassicaformis  | Fdx  | MMETSP0290_20130426_11262_1_158 | Y | 0.82 | 17 |   | 0.48 | 59 |
| Vitrella brassicaformis  | Fdx  | MMETSP0290_20130426_12802_1_160 | Y | 0.62 | 17 |   | 0.49 | 14 |
| Vitrella brassicaformis  | Fdx  | MMETSP0290_20130426_5440_1_197  | Y | 0.9  | 24 |   | 0.46 | 50 |









|            |            |               |                                |                                                                                             |      |   |   |   |   |   |   |   |   |
|------------|------------|---------------|--------------------------------|---------------------------------------------------------------------------------------------|------|---|---|---|---|---|---|---|---|
| Eukaryotic | OG5_128905 | PF3D7_1235200 | Plasmodium falciparum 3D7      | V-type K -independent H -translocating inorganic pyrophosphatase (VP2)                      | 1057 |   | y |   |   | y | y | y |   |
| Eukaryotic | OG5_128905 | PF3D7_1456800 | Plasmodium falciparum 3D7      | V-type H(-)-translocating pyrophosphatase, putative (VP1)                                   | 717  |   | y |   |   | y | y | y |   |
| Eukaryotic | OG5_128905 | TGME49_248670 | Toxoplasma gondii ME49         | V-type H(+)-translocating pyrophosphatase VP1                                               | 816  | y | y |   |   | y | y | y |   |
| Eukaryotic | OG5_128917 | TGME49_259530 | Toxoplasma gondii ME49         | GalNac                                                                                      | 751  |   |   |   | y | y | y | y |   |
| Eukaryotic | OG5_128972 | PF3D7_1031200 | Plasmodium falciparum 3D7      | MORN repeat-containing protein 1 (MORN1)                                                    | 364  | y |   |   |   | y | y | y |   |
| Eukaryotic | OG5_128972 | TGME49_310440 | Toxoplasma gondii ME49         | membrane occupation and recognition nexus protein MORN1 (MORN1)                             | 363  | y |   | y |   | y | y | y |   |
| Eukaryotic | OG5_128979 | cgd4_2720     | Cryptosporidium parvum Iowa II | P-type ATPase involved in cation transport                                                  | 1528 | y |   |   |   | y | y | y |   |
| Eukaryotic | OG5_129142 | TGME49_234570 | Toxoplasma gondii ME49         | sterol carrier protein-2 HAD-2SCP-2 (HAD2SCP2)                                              | 625  | y |   |   |   | y | y | y |   |
| Eukaryotic | OG5_129186 | PBANKA_020930 | Plasmodium berghei ANKA        | actin-related protein (ARP1)                                                                | 384  | y |   |   |   | y | y | y |   |
| Eukaryotic | OG5_129627 | PF3D7_0918000 | Plasmodium falciparum 3D7      | secreted acid phosphatase (GAP50)                                                           | 396  | y |   | y |   | y | y | y |   |
| Eukaryotic | OG5_129627 | TGME49_219320 | Toxoplasma gondii ME49         | acid phosphatase GAP50 (GAP50)                                                              | 431  |   |   | y |   | y | y | y |   |
| Eukaryotic | OG5_129645 | BBOV_IV007730 | Babesia bovis T2Bo             | cysteine protease 2                                                                         | 445  |   | y |   |   | y | y | y |   |
| Eukaryotic | OG5_129767 | PF3D7_1229400 | Plasmodium falciparum 3D7      | macrophage migration inhibitory factor (MIF)                                                | 116  |   | y |   |   | y | y | y |   |
| Eukaryotic | OG5_130026 | PF3D7_1211400 | Plasmodium falciparum 3D7      | heat shock protein DNAJ homologue Pfj4 (PFJ4)                                               | 244  |   | y |   |   | y | y | y |   |
| Eukaryotic | OG5_130494 | TGME49_289620 | Toxoplasma gondii ME49         | cathepsin CPC1 (CPC1)                                                                       | 733  | y |   |   |   | y | y | y |   |
| Eukaryotic | OG5_130542 | PBANKA_141030 | Plasmodium berghei ANKA        | M1-family aminopeptidase, putative                                                          | 1064 | y |   |   |   | y | y | y |   |
| Eukaryotic | OG5_131119 | TGME49_248830 | Toxoplasma gondii ME49         | phosphoinositide phospholipase PIPLC (PIPLC)                                                | 1097 |   |   | y |   | y | y | y |   |
| Eukaryotic | OG5_131558 | PF3D7_0718300 | Plasmodium falciparum 3D7      | cysteine repeat modular protein 2 (CRMP2)                                                   | 2543 | y | y |   |   | y | y | y |   |
| Eukaryotic | OG5_131558 | PF3D7_0911300 | Plasmodium falciparum 3D7      | cysteine repeat modular protein 1 (CRMP1)                                                   | 3303 | y |   |   |   | y | y | y |   |
| Eukaryotic | OG5_132039 | TGME49_242720 | Toxoplasma gondii ME49         | aspartyl protease ASP5 (ASP5)                                                               | 1012 |   |   | y |   | y | y | y |   |
| Eukaryotic | OG5_132295 | PF3D7_1343000 | Plasmodium falciparum 3D7      | phosphoethanolamine N-methyltransferase (PMT)                                               | 266  |   |   | y |   | y | y | y |   |
| Eukaryotic | OG5_132467 | PBANKA_030490 | Plasmodium berghei ANKA        | serine repeat antigen 3 (SERA3)                                                             | 1096 | y |   |   |   | y | y | y |   |
| Eukaryotic | OG5_132467 | PBANKA_030500 | Plasmodium berghei ANKA        | serine repeat antigen 2 (SERA2)                                                             | 1122 | y |   |   |   | y | y | y |   |
| Eukaryotic | OG5_132803 | TGME49_315560 | Toxoplasma gondii ME49         | ATP-binding cassette G family transporter ABCG77 (ABCG77)                                   | 1163 |   |   | y | y | y | y | y |   |
| Eukaryotic | OG5_133090 | TGME49_315220 | Toxoplasma gondii ME49         | rhoprtry protein ROP14 (ROP14)                                                              | 1061 | y |   |   |   | y | y | y |   |
| Eukaryotic | OG5_133546 | PF3D7_0808200 | Plasmodium falciparum 3D7      | plasmepsin X                                                                                | 573  | y |   |   |   | y | y | y |   |
| Eukaryotic | OG5_133546 | TGME49_246550 | Toxoplasma gondii ME49         | aspartyl protease ASP3 (ASP3)                                                               | 643  |   |   | y |   | y | y | y |   |
| Eukaryotic | OG5_134280 | PBANKA_082420 | Plasmodium berghei ANKA        | perforin like protein 3 (PPLP3)                                                             | 815  | y |   |   |   | - | y | y |   |
| Eukaryotic | OG5_134280 | PBANKA_100630 | Plasmodium berghei ANKA        | perforin like protein 1,sporozoite micronemal protein essential for cell traversal (SPECT2) | 810  | y |   |   |   | - | y | y |   |
| Eukaryotic | OG5_134280 | PY00454       | Plasmodium yoelii yoelii 17XNL | MAC/Perforin domain, putative                                                               | 727  | y |   |   |   | - | y | y |   |
| Eukaryotic | OG5_134280 | TGME49_204130 | Toxoplasma gondii ME49         | perforin-like protein PLP1 (PLP1)                                                           | 1161 | y |   |   |   | - | - | y |   |
| Eukaryotic | OG5_134639 | TGME49_259200 | Toxoplasma gondii ME49         | Na+/H+ exchanger NHE1                                                                       | 2288 |   | y |   |   | y | y | y |   |
| Eukaryotic | OG5_134918 | PF3D7_0522600 | Plasmodium falciparum 3D7      | inner membrane complex protein                                                              | 483  |   |   | y |   | y | - | y |   |
| Eukaryotic | OG5_134971 | gij5708122    | Eimeria tenella                | microneme protein 5                                                                         | 932  | y | y |   |   | y | - | - | X |
| Eukaryotic | OG5_135032 | PBANKA_103520 | Plasmodium berghei ANKA        | LCCL domain-containing protein (CCp3)                                                       | 1304 | y | y |   |   | y | y | y | X |
| Eukaryotic | OG5_135032 | PF3D7_1407000 | Plasmodium falciparum 3D7      | LCCL domain-containing protein (CCp3)                                                       | 1272 | y | y |   |   | y | y | y | X |
| Eukaryotic | OG5_135662 | PF3D7_0109100 | Plasmodium falciparum 3D7      | LCCL domain-containing protein (CCp5)                                                       | 1029 | y |   |   |   | y | y | y |   |
| Eukaryotic | OG5_135662 | PF3D7_1451600 | Plasmodium falciparum 3D7      | LCCL-like protein (FNPA)                                                                    | 865  | y |   |   |   | y | y | y |   |
| Eukaryotic | OG5_135731 | PF3D7_0506900 | Plasmodium falciparum 3D7      | rhomboid protease ROM4 (ROM4)                                                               | 759  | y |   |   |   | y | y | y |   |
| Eukaryotic | OG5_135731 | TGME49_268590 | Toxoplasma gondii ME49         | rhomboid protease ROM4 (ROM4)                                                               | 665  | y |   |   |   | y | y | y |   |
| Eukaryotic | OG5_136613 | PF3D7_1479000 | Plasmodium falciparum 3D7      | acyl-CoA synthetase (ACS1a)                                                                 | 820  | y |   |   |   | y | y | y |   |
| Eukaryotic | OG5_136898 | PF3D7_1227200 | Plasmodium falciparum 3D7      | potassium channel protein (K1)                                                              | 1966 | y |   |   |   | y | y | y |   |
| Eukaryotic | OG5_137241 | PBANKA_093350 | Plasmodium berghei ANKA        | rhomboid protease ROM1 (ROM1)                                                               | 278  | y | y |   |   | y | y | y |   |
| Eukaryotic | OG5_137241 | TGME49_200290 | Toxoplasma gondii ME49         | rhomboid protease ROM1 (ROM1)                                                               | 293  | y |   | y |   | y | y | y |   |
| Eukaryotic | OG5_137241 | TGME49_263290 | Toxoplasma gondii ME49         | rhomboid protease ROM2 (ROM2)                                                               | 283  | y |   | y |   | y | y | y |   |
| Eukaryotic | OG5_138369 | NCLIV_021050  | Neospora caninum Liverpool     | unspecified product                                                                         | 865  | y |   |   |   | y | y | y |   |
| Eukaryotic | OG5_138369 | PF3D7_0507500 | Plasmodium falciparum 3D7      | subtilisin-like protease 1 (SUB1)                                                           | 688  | y | y |   |   | y | y | y |   |
| Eukaryotic | OG5_138369 | TGME49_204050 | Toxoplasma gondii ME49         | subtilisin SUB1 (SUB1)                                                                      | 761  | y |   |   |   | y | y | y |   |
| Eukaryotic | OG5_138427 | gij110681634  | Plasmodium gallinaceum         | circumsporozoite protein/thrombospondin-related anonymous protein-related protein           | 1875 | y |   |   |   | y | y | y |   |
| Eukaryotic | OG5_138427 | gij156257452  | Eimeria tenella                | microneme 1 precursor                                                                       | 675  | y |   |   |   | y | y | y |   |





|              |            |               |                                  |                                                                                                                                                        |      |   |   |   |   |   |   |   |   |     |
|--------------|------------|---------------|----------------------------------|--------------------------------------------------------------------------------------------------------------------------------------------------------|------|---|---|---|---|---|---|---|---|-----|
| Eukaryotic   | OG5_165382 | PF3D7_0104200 | Plasmodium falciparum 3D7        | conserved Plasmodium protein, unknown function                                                                                                         | 466  | y |   |   |   |   | y | - | y |     |
| Eukaryotic   | OG5_165464 | TGME49_204420 | Toxoplasma gondii ME49           | oocyst wall protein OWP1 (OWP1)                                                                                                                        | 499  |   |   |   | y | y | - | y |   |     |
| Eukaryotic   | OG5_166914 | PF3D7_0410000 | Plasmodium falciparum 3D7        | conserved Plasmodium protein, unknown function                                                                                                         | 833  | y |   |   |   |   | y | - | y |     |
| Eukaryotic   | OG5_168383 | cgd1_3500     | Cryptosporidium parvum Iowa II   | thrombospondin related adhesive protein                                                                                                                | 687  | y |   |   |   |   | y | y | y |     |
| Eukaryotic   | OG5_171965 | TGME49_206510 | Toxoplasma gondii ME49           | toxolysin TLN4 (TLN4)                                                                                                                                  | 2340 | y |   |   |   |   | y | y | y |     |
| Eukaryotic   | OG5_171990 | TGME49_268310 | Toxoplasma gondii ME49           | oocyst wall protein OWP3 (OWP3)                                                                                                                        | 640  |   |   |   | y | y | - | y |   |     |
| Eukaryotic   | OG5_175386 | TGME49_206580 | Toxoplasma gondii ME49           | formin FRM2 (FRM2)                                                                                                                                     | 4709 |   |   | y |   |   | y | y | y |     |
| Eukaryotic   | OG5_193087 | TGME49_259020 | Toxoplasma gondii ME49           | bradyzoite antigen BAG1 (BAG1)                                                                                                                         | 229  |   | y |   |   |   | y | - | y |     |
| Eukaryotic   | OG5_195418 | cgd6_780      | Cryptosporidium parvum Iowa II   | CpTSP8, predicted extracellular protein with 3 TSP1 repeats, an EGF domain and a C-terminal transmembrane domain. adjacent TSP domain containing gene. | 625  | y |   | y |   |   | y | y | y |     |
| Eukaryotic   | OG5_204795 | TGME49_293770 | Toxoplasma gondii ME49           | chitinase-like protein CLP1 (CLP1)                                                                                                                     | 714  | y |   |   |   |   | - | - | y |     |
| Eukaryotic   | OG5_205532 | PF3D7_0902500 | Plasmodium falciparum 3D7        | serine/threonine protein kinase, FIKK family (FIKK9.6)                                                                                                 | 591  | y |   |   |   |   | y | - | y |     |
| Eukaryotic   | OG5_209056 | TGME49_247540 | Toxoplasma gondii ME49           | ATP-binding cassette G family transporter ABCG107 (ABCG107)                                                                                            | 981  |   | y |   |   |   | y | y | y |     |
| Eukaryotic   | OG5_225241 | TGME49_246930 | Toxoplasma gondii ME49           | calmodulin CAM1 (CAM1)                                                                                                                                 | 179  | y |   | y |   |   | y | y | y |     |
| Eukaryotic   | OG5_231889 | TGME49_245490 | Toxoplasma gondii ME49           | microneme protein MIC8 (MIC8)                                                                                                                          | 684  | y |   |   |   |   | y | y | y |     |
| Eukaryotic   | OG5_239228 | TGME49_294690 | Toxoplasma gondii ME49           | rhomboid protease ROM5 (ROM5)                                                                                                                          | 841  |   | y |   |   |   | y | y | y |     |
| Eukaryotic   | OG5_239269 | TGME49_208030 | Toxoplasma gondii ME49           | microneme protein MIC4 (MIC4)                                                                                                                          | 580  | y |   |   |   |   | y | - | - | X   |
| Eukaryotic   | OG5_239269 | gij7108680    | Sarcocystis muris                | microneme protein SML2                                                                                                                                 | 138  | y |   |   |   |   | y | - | - | X   |
| Eukaryotic   | OG5_239636 | TGME49_286150 | Toxoplasma gondii ME49           | PAN/Apple domain-containing protein                                                                                                                    | 407  | y |   |   |   |   | y | y | - | X   |
| Eukaryotic   | OG5_239946 | TGME49_282055 | Toxoplasma gondii ME49           | protein phosphatase PP2C-hn (PP2CHN)                                                                                                                   | 479  | y | y |   |   |   | y | y | y |     |
| Eukaryotic   | OG5_239994 | TGME49_262730 | Toxoplasma gondii ME49           | rhoptry protein ROP16 (ROP16)                                                                                                                          | 707  | y |   |   |   |   | y | y | y |     |
| Eukaryotic   | OG5_240010 | TGME49_262010 | Toxoplasma gondii ME49           | calmodulin CAM2 (CAM2)                                                                                                                                 | 142  | y |   | y |   |   | y | y | y |     |
| Eukaryotic   | OG5_240014 | TGME49_261780 | Toxoplasma gondii ME49           | microneme protein MIC7 (MIC7)                                                                                                                          | 340  | y |   |   |   |   | y | y | y |     |
| Eukaryotic   | OG5_241405 | gij32816824   | Sarcocystis neurona              | nucleoside triphosphate hydrolase                                                                                                                      | 714  | y |   |   |   |   | - | - | y |     |
| Eukaryotic   | OG5_243453 | PF3D7_0424500 | Plasmodium falciparum 3D7        | serine/threonine protein kinase, FIKK family (FIKK4.1)                                                                                                 | 622  | y |   |   |   |   | y | - | y |     |
| Eukaryotic   | OG5_143115 | PF3D7_0414900 | Plasmodium falciparum 3D7        | armadillo-domain containing rhoptry protein (ARO)                                                                                                      | 275  | y |   |   |   |   | y | y | y | X,C |
| Eukaryotic   | OG5_136403 | TGME49_231630 | Toxoplasma gondii ME49           | alveolin domain containing intermediate filament IMC4 (ALV4)                                                                                           | 452  | y |   | y |   |   | y | y | y | X,C |
| Eukaryotic   | OG5_139161 | TGME49_275670 | Toxoplasma gondii ME49           | alveolin domain containing intermediate filament IMC15 (ALV5)                                                                                          | 692  |   | y |   |   |   | y | y | y | X   |
| Eukaryotic   | OG5_141746 | NCLIV_000610  | Neospora caninum Liverpool       | putative profilin family protein                                                                                                                       | 163  | y |   |   |   |   | y | y | y | X   |
| Eukaryotic   | OG5_144120 | TGME49_216000 | Toxoplasma gondii ME49           | alveolin domain containing intermediate filament IMC3 (ALV3)                                                                                           | 538  |   | y |   |   |   | y | y | y | X,C |
| Eukaryotic   | OG5_146323 | PF3D7_0525800 | Plasmodium falciparum 3D7        | membrane skeletal protein IMC1-related                                                                                                                 | 300  | y |   | y |   |   | y | y | y | X,C |
| Eukaryotic   | OG5_156798 | PF3D7_0304000 | Plasmodium falciparum 3D7        | inner membrane complex protein 1a, putative (IMC1a)                                                                                                    | 861  |   | y |   |   |   | y | y | y | X,C |
| Eukaryotic   | OG5_156798 | TGME49_231640 | Toxoplasma gondii ME49           | alveolin domain containing intermediate filament IMC1 (ALV1)                                                                                           | 609  |   | y |   |   |   | y | y | y | X,C |
| Eukaryotic   | OG5_240413 | TGME49_268900 | Toxoplasma gondii ME49           | dense granular protein GRA10 (GRA10)                                                                                                                   | 894  | y |   |   |   |   | y | y | y | X   |
| Myzozoans    | OG5_153786 | PBANKA_090710 | Plasmodium berghei ANKA          | inner membrane complex protein 1b (IMC1b)                                                                                                              | 535  | y |   |   |   |   | - | - | - | X   |
| Myzozoans    | OG5_165465 | PF3D7_1321900 | Plasmodium falciparum 3D7        | conserved Plasmodium protein, unknown function                                                                                                         | 292  | y |   |   |   |   | y | y | - | X,W |
| Myzozoans    | OG5_147397 | TA20205       | Theileria annulata strain Ankara | schizont protein e                                                                                                                                     | 441  | y |   |   |   |   | y | y | - | X,W |
| Myzozoans    | OG5_144710 | PF3D7_1003600 | Plasmodium falciparum 3D7        | membrane skeletal protein IMC1-related (ALV5)                                                                                                          | 281  |   |   | y |   |   | y | y | - | X   |
| Myzozoans    | OG5_191678 | TA19865       | Theileria annulata strain Ankara | surface protein d precursor                                                                                                                            | 178  | y | y |   |   |   | y | y | - | X   |
| Piroplasmids | OG5_139232 | TP04_0051     | Theileria parva strain Muguga    | polymorphic immunodominant molecule                                                                                                                    | 480  |   | y |   |   |   | - | - | - | R   |
| Piroplasmids | OG5_153115 | PF3D7_1233600 | Plasmodium falciparum 3D7        | asparagine and aspartate rich protein 1 (AARP1)                                                                                                        | 5439 | y |   |   |   |   | - | - | - | R   |
| Piroplasmids | OG5_156194 | PY02159       | Plasmodium yoelii yoelii 17XNL   | Drosophila melanogaster CG15040 gene product                                                                                                           | 908  | y |   |   |   |   | - | - | - | R   |
| Piroplasmids | OG5_191821 | BBOV_IV009860 | Babesia bovis T2Bo               | rhoptry-associated protein 1 (RAP-1)                                                                                                                   | 565  | y |   |   |   |   | - | - | - | W   |
| Piroplasmids | OG5_191821 | gij255708246  | Babesia gibsoni                  | rhoptry-associated protein-1b                                                                                                                          | 484  | y |   |   |   |   | - | - | - |     |
| Piroplasmids | OG5_191821 | gij255708248  | Babesia gibsoni                  | rhoptry-associated protein-1c                                                                                                                          | 437  | y |   |   |   |   | - | - | - |     |
| Piroplasmids | OG5_191821 | gij88770794   | Babesia gibsoni                  | rhoptry-associated protein                                                                                                                             | 474  | y | y |   |   |   | - | - | - | W   |
| Plasmodium   | NO_GROUP   | PF3D7_0202200 | Plasmodium falciparum 3D7        | Plasmodium exported protein, unknown function                                                                                                          | 290  | y |   |   |   |   | - | - | - |     |
| Plasmodium   | NO_GROUP   | PF3D7_0424100 | Plasmodium falciparum 3D7        | reticulocyte binding protein homologue 5 (RH5)                                                                                                         | 526  | y |   | y |   |   | - | - | - |     |
| Plasmodium   | NO_GROUP   | PF3D7_0424200 | Plasmodium falciparum 3D7        | reticulocyte binding protein homologue 4 (RH4)                                                                                                         | 1716 | y |   |   |   |   | - | - | - |     |
| Plasmodium   | NO_GROUP   | PF3D7_0501200 | Plasmodium falciparum 3D7        | parasite-infected erythrocyte surface protein (PIESP2)                                                                                                 | 408  | y |   |   |   |   | - | - | - | R   |
| Plasmodium   | NO_GROUP   | PF3D7_0935900 | Plasmodium falciparum 3D7        | ring-exported protein 1 (REX1)                                                                                                                         | 713  | y |   |   |   |   | - | - | - |     |
| Plasmodium   | NO_GROUP   | PF3D7_0936800 | Plasmodium falciparum 3D7        | Plasmodium exported protein (PHISTc), unknown function                                                                                                 | 383  | y |   |   |   |   | - | - | - | R   |









**Table S5:** Classification of 21 bacterial genes in apicomplexans and relatives acquired by horizontal gene transfer (HGT).

| Origin <sup>1</sup>  | EuPathDb accession | Short name   | Protein name                                                 | EC        | Pathway                            | Original reference for HGT |
|----------------------|--------------------|--------------|--------------------------------------------------------------|-----------|------------------------------------|----------------------------|
| API+CHP              | TGME49_261850      | PREX         | DNA polymerase complex (plastid)                             | 2.7.7.7   | DNA replication                    | Seow et al., 2005 (10)     |
| API+CHP              | TGME49_227420      | IspH, (LytB) | 4-hydroxy-3-methylbut-2-enyl diphosphate reductase (plastid) | 1.17.1.2  | Isoprenoid biosynthesis            | Identified in this study   |
| API+CHP              | TGME49_258650      | FeCH (HemH)  | ferrochelatase (mitochondrial)                               | 4.99.1.1  | Tetrapyrrole biosynthesis          | Sato & Wilson, 2003 (11)   |
| API+CHP              | TGME49_217740      | FabG         | 3-oxoacyl-ACP reductase (plastid)                            | 1.1.1.100 | Fatty acid biosynthesis            | Identified in this study   |
| API+CHP              | cgd7_480           | MDH/LDH      | malate/lactate dehydrogenase                                 | 1.1.1.37  | Carbohydrate metabolism            | Madern et al., 2003 (12)   |
| API+CHP              | cgd6_4570          | GlnA         | glutamine synthetase                                         | 6.3.1.2   | Amino acid and nitrogen metabolism | Huang et al., 2004a (5)    |
| API+CHP <sup>2</sup> | TGME49_208090      | YgfA         | 5-formyltetrahydrofolate cyclo-ligase                        | 6.3.3.2   | Folate metabolism                  | Identified in this study   |
| MYZ                  | TGME49_307030      | PNP          | purine-nucleoside phosphorylase                              | 2.4.2.1   | Purine metabolism                  | Kicska et al., 2003 (13)   |
| MYZ                  | TGME49_244430      | PUS          | pseudouridylate synthase                                     | 4.2.1.70  | Pyrimidine metabolism              | Identified in this study   |
| MYZ                  | TGME49_233140      | DUT          | desoxyuridine 5-triophosphate nucleotidohydrolase            | 3.6.1.23  | Pyrimidine metabolism              | Identified in this study   |
| MYZ                  | cgd4_740           | Thio         | thioredoxin peroxidase                                       | 1.11.1.15 | Redox reactions                    | Huang et al., 2004a (5)    |
| MYZ                  | TGME49_247510      | Fbp          | fructose-1,6-bisphosphatase                                  | 3.1.3.11  | Carbohydrate metabolism            | Huang et al., 2004b (14)   |
| MYZ                  | cgd6_3280          | GlgB         | 1,4-alpha-glucan branching enzyme                            | 2.4.1.18  | Carbohydrate metabolism            | Huang et al., 2004a (5)    |
| EUK                  | cgd2_570           | TrmH         | tRNA/rRNA methyltransferase                                  | 2.1.1.34  | RNA modification                   | Huang et al., 2004a (5)    |
| EUK                  | cgd6_3750          | AMY          | alpha-amylase                                                | 3.2.1.1   | Carbohydrate metabolism            | Huang et al., 2004a (5)    |
| EUK                  | cgd1_730           | QPCT         | glutamine cyclotransferase                                   | 2.3.2.5   | Peptide modification               | Huang et al., 2004a (5)    |
| EUK                  | cgd8_3430          | ANPEP        | aminopeptidase N                                             | 3.4.11.2  | Peptide modification               | Huang et al., 2004a (5)    |
| EUK                  | cgd2_2020          |              | hypothetical protein                                         |           | Unknown                            | Huang et al., 2004a (5)    |
| EUK                  | cgd5_3230          | SOD          | superoxide dismutase                                         | 1.15.1.1  | Superoxide conversion              | Huang et al., 2004a (5)    |
| EUK                  | cgd8_350           | NARS         | asparaginyl-tRNA synthetase                                  | 6.3.5.6   | Aminoacyl-tRNA synthesis           | Huang et al., 2004a (5)    |
| EUK <sup>3</sup>     | cgd6_2130          | RsmE         | 16S RNA methyltransferase                                    | 2.1.1.193 | RNA modification                   | Huang et al., 2004a (11)   |

<sup>1</sup> Acquired in the ancestor of apicomplexans and chrompodellids (API+CHP), myzozoans (MYZ) or shares a common origin with one or more other eukaryotes (EUK).

<sup>2</sup> YgfA is absent in dinoflagellates and most other eukaryotes.

<sup>3</sup> The relationship of apicomplexan RsmE to that of bacteria and other eukaryotes is unresolved in phylogenies (however a related homolog is found in chrompodellids suggesting that neither this gene represents an apicomplexan-specific HGT).

**Table S6:** Classification of 74 unique proteins specific to apicomplexans, apicomplexans and chrompodellids, and myzozoans.

| Origin                | Localization | Protein EuPathDb accession | Organism                       | Protein annotation                                      | Len gth | OrthoMCL Group | Note | Putative function (reference)                                        |
|-----------------------|--------------|----------------------------|--------------------------------|---------------------------------------------------------|---------|----------------|------|----------------------------------------------------------------------|
| Apicomplexan-specific | Apical       | PF3D7_1318000              | Plasmodium falciparum 3D7      | conserved Plasmodium membrane protein, unknown function | 192     | OG5_145102     |      | Apical protein linked to merozoite invasion (15)                     |
| Apicomplexan-specific | Apical       | PF3D7_1030200              | Plasmodium falciparum 3D7      | conserved Plasmodium protein, unknown function          | 450     | OG5_143206     | R    | Apical protein linked to merozoite invasion (15)                     |
| Apicomplexan-specific | Apical       | PF3D7_0210600              | Plasmodium falciparum 3D7      | conserved Plasmodium protein, unknown function          | 446     | OG5_141751     |      | Apical protein linked to merozoite invasion (15)                     |
| Apicomplexan-specific | Apical       | PF3D7_0214900              | Plasmodium falciparum 3D7      | rhostry neck protein 6 (RON6)                           | 950     | OG5_150575     | R    | Secreted from rhostrys during merozoite invasion (16)                |
| Apicomplexan-specific | Apical       | TGME49_310010              | Toxoplasma gondii ME49         | rhostry neck protein RON1 (RON1)                        | 1158    | OG5_222773     | R    | GPI anchor-containing rhostry membrane protein (17)                  |
| Apicomplexan-specific | Apical       | PBANKA_141830              | Plasmodium berghei ANKA        | rhostry protein 2, putative (PRP2)                      | 1272    | OG5_166877     | R    | Essential rhostry protein possibly involved in rhostry assembly (18) |
| Apicomplexan-specific | Exported     | PF3D7_1463900              | Plasmodium falciparum 3D7      | conserved Plasmodium membrane protein, unknown function | 1071    | OG5_141738     |      | Exported to erythrocyte from merozoite (19)                          |
| Apicomplexan-specific |              | TGME49_261750              | Toxoplasma gondii ME49         | rhostry neck protein RON10 (RON10)                      | 835     | OG5_171370     |      | Possibly involved in sorting proteins to rhostrys (20)               |
| Apicomplexan-specific |              | cgd7_4030                  | Cryptosporidium parvum Iowa II | hypothetical low complexity protein                     | 586     | OG5_160601     |      | Unknown                                                              |
| Apicomplexan-specific |              | TGME49_200330              | Toxoplasma gondii ME49         | hypothetical protein                                    | 589     | OG5_142982     |      | Unknown                                                              |

|                       |                    |               |                                  |                                                                            |      |            |                                                                                                    |
|-----------------------|--------------------|---------------|----------------------------------|----------------------------------------------------------------------------|------|------------|----------------------------------------------------------------------------------------------------|
| Apicomplexan-specific |                    | TGME49_202120 | Toxoplasma gondii ME49           | hypothetical protein                                                       | 1322 | OG5_142642 | Unknown                                                                                            |
| Apicomplexan-specific |                    | TGME49_222350 | Toxoplasma gondii ME49           | hypothetical protein                                                       | 410  | OG5_143198 | Unknown                                                                                            |
| Apicomplexan-specific |                    | TGME49_222940 | Toxoplasma gondii ME49           | hypothetical protein                                                       | 489  | OG5_171982 | Unknown                                                                                            |
| Apicomplexan-specific |                    | TGME49_235670 | Toxoplasma gondii ME49           | hypothetical protein                                                       | 558  | OG5_156810 | Unknown                                                                                            |
| Apicomplexan-specific |                    | TGME49_244080 | Toxoplasma gondii ME49           | hypothetical protein                                                       | 376  | OG5_171957 | Unknown                                                                                            |
| Apicomplexan-specific |                    | TGME49_274160 | Toxoplasma gondii ME49           | hypothetical protein                                                       | 525  | OG5_145098 | Unknown                                                                                            |
| Apicomplexan-specific |                    | TGME49_282020 | Toxoplasma gondii ME49           | hypothetical protein                                                       | 394  | OG5_180667 | Unknown                                                                                            |
| Apicomplexan-specific |                    | TGME49_318390 | Toxoplasma gondii ME49           | hypothetical protein                                                       | 1278 | OG5_171978 | Unknown                                                                                            |
| Apicomplexan-specific |                    | TGME49_202290 | Toxoplasma gondii ME49           | membrane protein, putative                                                 | 349  | OG5_141728 | Unknown                                                                                            |
| Apicomplexan-specific | IMC                | TGME49_202500 | Toxoplasma gondii ME49           | GAPM1a                                                                     | 305  | OG5_140542 | Six-pass transmembrane IMC protein with IMC-anchoring role in gliding (21)                         |
| Apicomplexan-specific | IMC                | TGME49_206690 | Toxoplasma gondii ME49           | glideosome-associated protein with multiple-membrane spans GAPM2B (GAPM2B) | 426  | OG5_141755 | Six-pass transmembrane IMC protein with IMC-anchoring role in gliding (21)                         |
| Apicomplexan-specific | IMC                | TGME49_271970 | Toxoplasma gondii ME49           | glideosome-associated protein with multiple-membrane spans GAPM3           | 310  | OG5_143227 | Six-pass transmembrane IMC protein with IMC-anchoring role in gliding (21)                         |
| Apicomplexan-specific | Oocyst wall        | cgd6_200      | Cryptosporidium parvum Iowa II   | oocyst wall protein 8                                                      | 457  | OG5_225269 | Oocyst wall-specific protein (9)                                                                   |
| Apicomplexan-specific | Oocyst wall        | TGME49_209610 | Toxoplasma gondii ME49           | oocyst wall protein OWP2 (OWP2)                                            | 462  | OG5_239307 | Oocyst wall-specific protein (22)                                                                  |
| Apicomplexan-specific | Apical             | PF3D7_0414600 | Plasmodium falciparum 3D7        | conserved protein, unknown function                                        | 235  | OG5_145116 | Apical protein linked to merozoite invasion (15)                                                   |
| Api+Chromp-specific   |                    | TGME49_200460 | Toxoplasma gondii ME49           | hypothetical protein                                                       | 436  | OG5_171961 | Unknown                                                                                            |
| Api+Chromp-specific   |                    | TGME49_202040 | Toxoplasma gondii ME49           | hypothetical protein                                                       | 1047 | OG5_143225 | Unknown                                                                                            |
| Api+Chromp-specific   |                    | TGME49_205680 | Toxoplasma gondii ME49           | hypothetical protein                                                       | 805  | OG5_156805 | R Unknown                                                                                          |
| Api+Chromp-specific   |                    | TGME49_209490 | Toxoplasma gondii ME49           | hypothetical protein                                                       | 505  | OG5_171967 | Unknown                                                                                            |
| Api+Chromp-specific   |                    | TGME49_209600 | Toxoplasma gondii ME49           | hypothetical protein                                                       | 451  | OG5_171975 | Unknown                                                                                            |
| Api+Chromp-specific   |                    | TGME49_217480 | Toxoplasma gondii ME49           | hypothetical protein                                                       | 1589 | OG5_169915 | Unknown                                                                                            |
| Api+Chromp-specific   |                    | TGME49_219160 | Toxoplasma gondii ME49           | hypothetical protein                                                       | 349  | OG5_145100 | Unknown                                                                                            |
| Api+Chromp-specific   |                    | TGME49_240470 | Toxoplasma gondii ME49           | hypothetical protein                                                       | 409  | OG5_171976 | Unknown                                                                                            |
| Api+Chromp-specific   |                    | TGME49_245520 | Toxoplasma gondii ME49           | hypothetical protein                                                       | 235  | OG5_169642 | Unknown                                                                                            |
| Api+Chromp-specific   |                    | TGME49_255410 | Toxoplasma gondii ME49           | hypothetical protein                                                       | 165  | OG5_143229 | Unknown                                                                                            |
| Api+Chromp-specific   |                    | TGME49_258920 | Toxoplasma gondii ME49           | hypothetical protein                                                       | 481  | OG5_150770 | Unknown                                                                                            |
| Api+Chromp-specific   |                    | TGME49_262890 | Toxoplasma gondii ME49           | hypothetical protein                                                       | 555  | OG5_144475 | Unknown                                                                                            |
| Api+Chromp-specific   |                    | TGME49_263440 | Toxoplasma gondii ME49           | hypothetical protein                                                       | 600  | OG5_163433 | Unknown                                                                                            |
| Api+Chromp-specific   |                    | TGME49_264020 | Toxoplasma gondii ME49           | hypothetical protein                                                       | 647  | OG5_171222 | Unknown                                                                                            |
| Api+Chromp-specific   |                    | TGME49_266630 | Toxoplasma gondii ME49           | hypothetical protein                                                       | 582  | OG5_141750 | Unknown                                                                                            |
| Api+Chromp-specific   |                    | TGME49_268690 | Toxoplasma gondii ME49           | hypothetical protein                                                       | 577  | OG5_160615 | Unknown                                                                                            |
| Api+Chromp-specific   |                    | TGME49_273040 | Toxoplasma gondii ME49           | hypothetical protein                                                       | 311  | OG5_143217 | Unknown                                                                                            |
| Api+Chromp-specific   |                    | TGME49_273705 | Toxoplasma gondii ME49           | hypothetical protein                                                       | 424  | OG5_145099 | Unknown                                                                                            |
| Api+Chromp-specific   |                    | TGME49_311880 | Toxoplasma gondii ME49           | hypothetical protein                                                       | 728  | OG5_160577 | Unknown                                                                                            |
| Api+Chromp-specific   |                    | TGME49_313380 | Toxoplasma gondii ME49           | hypothetical protein                                                       | 274  | OG5_141745 | Unknown                                                                                            |
| Api+Chromp-specific   |                    | TGME49_309850 | Toxoplasma gondii ME49           | insulin-degrading enzyme                                                   | 456  | OG5_147636 | Unknown                                                                                            |
| Api+Chromp-specific   |                    | cgd8_5160     | Cryptosporidium parvum Iowa II   | uncharacterized apicomplexan-specific protein                              | 170  | OG5_143199 | Unknown                                                                                            |
| Api+Chromp-specific   |                    | cgd7_1550     | Cryptosporidium parvum Iowa II   | uncharacterized protein                                                    | 840  | OG5_195587 | Unknown                                                                                            |
| Myzozoan specific     | Exported, Membrane | TA20205       | Theileria annulata strain Ankara | schizont protein e                                                         | 441  | OG5_147397 | W Exported protein associated with host cell microtubules (23)                                     |
| Myzozoan specific     | Exported, Membrane | TA19865       | Theileria annulata strain Ankara | surface protein d precursor                                                | 178  | OG5_191678 | Exported membrane protein (24)                                                                     |
| Myzozoan specific     | Apical             | PF3D7_1321900 | Plasmodium falciparum 3D7        | conserved Plasmodium protein, unknown function                             | 292  | OG5_165465 | W Apical protein linked to merozoite invasion (15)                                                 |
| Myzozoan specific     | IMC                | TGME49_237820 | Toxoplasma gondii ME49           | IMC sub-compartment protein ISP2 (ISP2)                                    | 160  | OG5_141732 | IMC protein involved in cell division (25)                                                         |
| Myzozoan specific     | Apical             | PBANKA_090710 | Plasmodium berghei ANKA          | inner membrane complex protein 1b, putative (IMC1b)                        | 504  | OG5_153786 | Membrane skeleton protein involved in cell shape maintenance, gliding motility, and infection (26) |
| Myzozoan specific     | IMC                | PF3D7_1003600 | Plasmodium falciparum 3D7        | IMC-related (ALV5)                                                         | 281  | OG5_144710 | Alveolin domain-containing protein linked to merozoite invasion (15)                               |
| Myzozoan specific     |                    | cgd8_5030     | Cryptosporidium parvum Iowa II   | articulin family protein, Pfs77 protein-related                            | 324  | OG5_147639 | Alveolin domain-containing protein                                                                 |
| Myzozoan specific     |                    | TGME49_260500 | Toxoplasma gondii ME49           | COPI associated protein, putative                                          | 270  | OG5_143228 | Unknown                                                                                            |
| Myzozoan specific     |                    | cgd8_2990     | Cryptosporidium parvum Iowa II   | hypothetical protein                                                       | 180  | OG5_151232 | Unknown                                                                                            |
| Myzozoan specific     |                    | TGME49_203358 | Toxoplasma gondii ME49           | hypothetical protein                                                       | 395  | OG5_143204 | Unknown                                                                                            |
| Myzozoan specific     |                    | TGME49_205320 | Toxoplasma gondii ME49           | hypothetical protein                                                       | 655  | OG5_141752 | Unknown                                                                                            |
| Myzozoan specific     |                    | TGME49_207240 | Toxoplasma gondii ME49           | hypothetical protein                                                       | 108  | OG5_171986 | Unknown                                                                                            |
| Myzozoan specific     |                    | TGME49_209890 | Toxoplasma gondii ME49           | hypothetical protein                                                       | 193  | OG5_138808 | Unknown                                                                                            |
| Myzozoan specific     |                    | TGME49_215430 | Toxoplasma gondii ME49           | hypothetical protein                                                       | 244  | OG5_143223 | Unknown                                                                                            |
| Myzozoan specific     |                    | TGME49_216410 | Toxoplasma gondii ME49           | hypothetical protein                                                       | 188  | OG5_143208 | Unknown                                                                                            |
| Myzozoan specific     |                    | TGME49_225840 | Toxoplasma gondii ME49           | hypothetical protein                                                       | 686  | OG5_156809 | Unknown                                                                                            |
| Myzozoan specific     |                    | TGME49_244360 | Toxoplasma gondii ME49           | hypothetical protein                                                       | 383  | OG5_145121 | Unknown                                                                                            |



|                   |               |                        |                      |      |            |         |
|-------------------|---------------|------------------------|----------------------|------|------------|---------|
| Myzozoon specific | TGME49_258820 | Toxoplasma gondii ME49 | hypothetical protein | 129  | OG5_141758 | Unknown |
| Myzozoon specific | TGME49_265510 | Toxoplasma gondii ME49 | hypothetical protein | 272  | OG5_146989 | Unknown |
| Myzozoon specific | TGME49_267510 | Toxoplasma gondii ME49 | hypothetical protein | 346  | OG5_150760 | Unknown |
| Myzozoon specific | TGME49_269310 | Toxoplasma gondii ME49 | hypothetical protein | 968  | OG5_141231 | Unknown |
| Myzozoon specific | TGME49_293720 | Toxoplasma gondii ME49 | hypothetical protein | 336  | OG5_147633 | Unknown |
| Myzozoon specific | TGME49_297870 | Toxoplasma gondii ME49 | hypothetical protein | 872  | OG5_171974 | Unknown |
| Myzozoon specific | TGME49_306980 | Toxoplasma gondii ME49 | hypothetical protein | 226  | OG5_147631 | Unknown |
| Myzozoon specific | TGME49_310210 | Toxoplasma gondii ME49 | hypothetical protein | 788  | OG5_150590 | Unknown |
| Myzozoon specific | TGME49_310270 | Toxoplasma gondii ME49 | hypothetical protein | 1357 | OG5_141163 | Unknown |

**Table S7:** Domain superfamilies in chrompodellid and dinoflagellate PKS1/FAS1 proteins identified by NCBI Conserved Domains searches.

| Organism                         | Contig translation or Protein name | Start | End  | E-value   | Bit Score | Super-family | Superfamily description | Domain n <sup>1</sup> | Not e <sup>2</sup> |
|----------------------------------|------------------------------------|-------|------|-----------|-----------|--------------|-------------------------|-----------------------|--------------------|
| Colpodella angusta Spi-2         | a2699_83_57_7353-79                | 1     | 44   | 1.97E-015 | 74.98     | cl09936      | PP-binding              | ACP                   | N                  |
| Colpodella angusta Spi-2         | a2699_83_57_7353-79                | 77    | 474  | 2.07E-160 | 502.86    | cl09938      | cond_enzymes            | KS                    |                    |
| Colpodella angusta Spi-2         | a2699_83_57_7353-79                | 527   | 826  | 3.96E-107 | 346.7     | cl08282      | Acyl_transf_1           | AT                    |                    |
| Colpodella angusta Spi-2         | a2699_83_57_7353-79                | 1235  | 1456 | 8.06E-048 | 178.25    | cl09931      | NADB_Rossmann           | KR                    | N                  |
| Colpodella angusta Spi-2         | a2699_83_57_7353-79                | 1504  | 1564 | 1.51E-012 | 66.5      | cl09936      | PP-binding              | ACP                   | N                  |
| Colpodella angusta Spi-2         | a2699_83_57_7353-79                | 1629  | 1926 | 6.30E-069 | 236.78    | cl09931      | NADB_Rossmann           | SDR                   |                    |
| Colpodella angusta Spi-2         | a6216_94_7_1-3726                  | 120   | 209  | 1.99E-005 | 46.58     | cl00509      | hot_dog                 | DH                    | N                  |
| Colpodella angusta Spi-2         | a6216_94_7_1-3726                  | 610   | 903  | 3.61E-083 | 274.06    | cl16912      | MDR                     | ER                    |                    |
| Colpodella angusta Spi-2         | a6216_94_7_1-3726                  | 950   | 1121 | 6.87E-035 | 133.03    | cl09931      | NADB_Rossmann           | KR                    |                    |
| Colpodella angusta Spi-2         | a6216_94_7_1-3726                  | 1184  | 1239 | 3.77E-007 | 49.11     | cl09936      | PP-binding              | ACP                   |                    |
| Colpodella angusta BE-6          | a1114_130_47_6309-79               | 1     | 126  | 9.03E-044 | 166.97    | cl09938      | cond_enzymes            | KS                    | N                  |
| Colpodella angusta BE-6          | a1114_130_47_6309-79               | 179   | 478  | 7.33E-108 | 348.24    | cl08282      | Acyl_transf_1           | AT                    |                    |
| Colpodella angusta BE-6          | a1114_130_47_6309-79               | 887   | 1108 | 3.48E-048 | 179.02    | cl09931      | NADB_Rossmann           | KR                    | N                  |
| Colpodella angusta BE-6          | a1114_130_47_6309-79               | 1156  | 1216 | 1.16E-012 | 66.5      | cl09936      | PP-binding              | ACP                   | N                  |
| Colpodella angusta BE-6          | a1114_130_47_6309-79               | 1281  | 1578 | 3.73E-069 | 237.16    | cl09931      | NADB_Rossmann           | SDR                   |                    |
| Colpodella angusta BE-6          | a1273513_2_3_336-1                 | 1     | 44   | 2.66E-008 | 46.86     | cl09936      | PP-binding              | ACP                   | N                  |
| Colpodella angusta BE-6          | a1273513_2_3_336-1                 | 64    | 111  | 3.31E-014 | 66.81     | cl09938      | cond_enzymes            | KS                    | C                  |
| Colpodella angusta BE-6          | a172836_7_22_2511-1                | 1     | 209  | 1.18E-052 | 185.08    | cl16912      | MDR                     | ER                    | N                  |
| Colpodella angusta BE-6          | a172836_7_22_2511-1                | 222   | 453  | 5.26E-067 | 228.71    | cl09931      | NADB_Rossmann           | KR                    | N                  |
| Colpodella angusta BE-6          | a172836_7_22_2511-1                | 484   | 562  | 3.24E-022 | 92.7      | cl09936      | PP-binding              | ACP                   |                    |
| Colpodella angusta BE-6          | a172836_7_22_2511-1                | 595   | 833  | 6.71E-095 | 306.02    | cl09938      | cond_enzymes            | KS                    | C                  |
| Colpodella angusta BE-6          | a490947_4_4_1-738                  | 1     | 124  | 8.98E-044 | 153.87    | cl09938      | cond_enzymes            | KS                    | N                  |
| Colpodella angusta BE-6          | a490947_4_4_1-738                  | 153   | 224  | 2.27E-014 | 69.3      | cl00509      | hot_dog                 | DH                    | C                  |
| Colpodella angusta BE-6          | a511308_3_4_2-496                  | 1     | 79   | 1.15E-032 | 120.36    | cl09938      | cond_enzymes            | KS                    | N                  |
| Colpodella angusta BE-6          | a511308_3_4_2-496                  | 112   | 165  | 5.45E-012 | 60.88     | cl08282      | Acyl_transf_1           | AT                    | C                  |
| Colpodella angusta BE-6          | a950_137_16_23-7138                | 53    | 497  | 1.80E-154 | 486.3     | cl09938      | cond_enzymes            | KS                    |                    |
| Colpodella angusta BE-6          | a950_137_16_23-7138                | 701   | 1006 | 5.75E-045 | 167.58    | cl08282      | Acyl_transf_1           | AT                    |                    |
| Colpodella angusta BE-6          | a950_137_16_23-7138                | 1098  | 1383 | 4.51E-012 | 67.76     | cl00509      | hot_dog                 | DH                    |                    |
| Colpodella angusta BE-6          | a950_137_16_23-7138                | 1740  | 2033 | 2.01E-082 | 275.6     | cl16912      | MDR                     | ER                    |                    |
| Colpodella angusta BE-6          | a950_137_16_23-7138                | 2080  | 2251 | 2.05E-034 | 133.03    | cl09931      | NADB_Rossmann           | KR                    |                    |
| Colpodella angusta BE-6          | a950_137_16_23-7138                | 2314  | 2369 | 3.82E-007 | 49.88     | cl09936      | PP-binding              | ACP                   |                    |
| Vitrella brassicaformis CCMP3155 | MMETSP0288-20130426_11567_1_305    | 1     | 64   | 2.50E-009 | 56.04     | cl16912      | MDR                     | ER                    | N                  |
| Vitrella brassicaformis CCMP3155 | MMETSP0288-20130426_11567_1_305    | 82    | 305  | 7.82E-078 | 244.12    | cl09931      | NADB_Rossmann           | KR                    | N                  |
| Vitrella brassicaformis CCMP3155 | MMETSP0288-20130426_3923_1_1196    | 2     | 101  | 3.17E-028 | 118.16    | cl09931      | NADB_Rossmann           | KR                    | N                  |
| Vitrella brassicaformis CCMP3155 | MMETSP0288-20130426_3923_1_1196    | 134   | 212  | 9.58E-019 | 83.45     | cl09936      | PP-binding              | ACP                   |                    |
| Vitrella brassicaformis CCMP3155 | MMETSP0288-20130426_3923_1_1196    | 370   | 669  | 2.32E-074 | 249.11    | cl09931      | NADB_Rossmann           | SDR                   |                    |
| Vitrella brassicaformis CCMP3155 | MMETSP0288-20130426_6061_1_544     | 43    | 442  | 0.00E+000 | 534.45    | cl09938      | cond_enzymes            | KS                    |                    |
| Vitrella brassicaformis CCMP3155 | MMETSP0288-20130426_6061_1_544     | 514   | 544  | 5.07E-011 | 62.42     | cl08282      | Acyl_transf_1           | AT                    | C                  |
| Vitrella brassicaformis CCMP3155 | MMETSP0288-20130426_65964_1_2899   | 25    | 442  | 2.42E-171 | 536.37    | cl09938      | cond_enzymes            | KS                    |                    |
| Vitrella brassicaformis CCMP3155 | MMETSP0288-20130426_65964_1_2899   | 502   | 797  | 1.96E-109 | 354.02    | cl08282      | Acyl_transf_1           | AT                    |                    |
| Vitrella brassicaformis CCMP3155 | MMETSP0288-20130426_65964_1_2899   | 847   | 1156 | 5.94E-050 | 182.17    | cl00509      | hot_dog                 | DH                    |                    |
| Vitrella brassicaformis CCMP3155 | MMETSP0288-20130426_65964_1_2899   | 1402  | 1512 | 3.90E-011 | 66.54     | cl09931      | NADB_Rossmann           | KR                    | C                  |
| Vitrella brassicaformis CCMP3155 | MMETSP0288-20130426_65964_1_2899   | 1635  | 1949 | 6.75E-081 | 271.75    | cl16912      | MDR                     | ER                    |                    |
| Vitrella brassicaformis CCMP3155 | MMETSP0288-20130426_65964_1_2899   | 1977  | 2211 | 1.28E-061 | 219.08    | cl09931      | NADB_Rossmann           | KR                    | N                  |
| Vitrella brassicaformis CCMP3155 | MMETSP0288-20130426_65964_1_2899   | 2252  | 2335 | 1.47E-019 | 87.31     | cl09936      | PP-binding              | ACP                   |                    |
| Vitrella brassicaformis CCMP3155 | MMETSP0288-20130426_65964_1_2899   | 2496  | 2796 | 2.12E-079 | 267.6     | cl09931      | NADB_Rossmann           | SDR                   |                    |
| Vitrella brassicaformis CCMP3155 | MMETSP0288-20130426_66433_1_1647   | 52    | 1010 | 7.86E-129 | 415.06    | cl17068      | AFD_class_I             | FAAL                  |                    |
| Vitrella brassicaformis CCMP3155 | MMETSP0288-20130426_66433_1_1647   | 1105  | 1176 | 2.48E-009 | 56.49     | cl09936      | PP-binding              | ACP                   |                    |
| Vitrella brassicaformis CCMP3155 | MMETSP0288-20130426_66433_1_1647   | 1248  | 1547 | 5.09E-047 | 172.45    | cl09931      | NADB_Rossmann           | KR                    |                    |
| Vitrella brassicaformis CCMP3155 | MMETSP0288-20130426_66484_1_586    | 1     | 115  | 2.49E-043 | 158.99    | cl09931      | NADB_Rossmann           | KR                    | N                  |
| Vitrella brassicaformis CCMP3155 | MMETSP0288-20130426_66484_1_586    | 218   | 273  | 1.07E-015 | 73.05     | cl09936      | PP-binding              | ACP                   | N                  |
| Vitrella brassicaformis CCMP3155 | MMETSP0288-20130426_66484_1_586    | 473   | 585  | 5.66E-035 | 133.16    | cl09931      | NADB_Rossmann           | SDR                   | C                  |
| Vitrella brassicaformis CCMP3155 | MMETSP0288-20130426_66893_1_2173   | 2     | 53   | 5.26E-006 | 46.86     | cl09936      | PP-binding              | ACP                   | N                  |
| Vitrella brassicaformis CCMP3155 | MMETSP0288-20130426_66893_1_2173   | 82    | 604  | 1.95E-150 | 473.58    | cl09938      | cond_enzymes            | KS                    |                    |
| Vitrella brassicaformis CCMP3155 | MMETSP0288-20130426_66893_1_2173   | 636   | 961  | 1.69E-105 | 341.69    | cl08282      | Acyl_transf_1           | AT                    |                    |
| Vitrella brassicaformis CCMP3155 | MMETSP0288-20130426_66893_1_2173   | 1242  | 1740 | 2.81E-069 | 240.65    | cl09931      | NADB_Rossmann           | KR                    |                    |
| Vitrella brassicaformis CCMP3155 | MMETSP0288-20130426_66893_1_2173   | 1791  | 1874 | 3.16E-013 | 68.43     | cl09936      | PP-binding              | ACP                   |                    |
| Vitrella brassicaformis CCMP3155 | MMETSP0288-20130426_66893_1_2173   | 1910  | 2169 | 3.56E-025 | 107.91    | cl19140      | Hydrolase_4             |                       |                    |
| Vitrella brassicaformis CCMP3155 | MMETSP0288-20130426_67019_1_1077   | 3     | 291  | 8.22E-030 | 120.92    | cl00509      | hot_dog                 | DH                    |                    |
| Vitrella brassicaformis CCMP3155 | MMETSP0288-20130426_67019_1_1077   | 402   | 563  | 4.11E-008 | 55.37     | cl09931      | NADB_Rossmann           | KR                    | C                  |
| Vitrella brassicaformis CCMP3155 | MMETSP0288-20130426_67019_1_1077   | 599   | 896  | 2.89E-102 | 325.29    | cl16912      | MDR                     | ER                    |                    |
| Vitrella brassicaformis CCMP3155 | MMETSP0288-20130426_67019_1_1077   | 930   | 1076 | 1.93E-036 | 137.27    | cl09931      | NADB_Rossmann           | KR                    | C                  |
| Vitrella brassicaformis CCMP3155 | MMETSP0288-20130426_67680_1_938    | 605   | 653  | 4.63E-008 | 54.87     | cl09938      | cond_enzymes            | KS                    | N                  |
| Vitrella brassicaformis CCMP3155 | MMETSP0288-20130426_67680_1_938    | 681   | 820  | 3.27E-040 | 151.02    | cl08282      | Acyl_transf_1           | AT                    | C                  |

|                                  |                                  |       |       |           |        |         |                      |      |    |
|----------------------------------|----------------------------------|-------|-------|-----------|--------|---------|----------------------|------|----|
| Vitrella brassicaformis CCMP3155 | MMETSP0288-20130426_68652_1_1566 | 122   | 182   | 6.80E-008 | 54.5   | cl16912 | MDR                  | ER   | C  |
| Vitrella brassicaformis CCMP3155 | MMETSP0288-20130426_68652_1_1566 | 342   | 591   | 9.27E-063 | 220.62 | cl09931 | NADB_Rossmann        | KR   | N  |
| Vitrella brassicaformis CCMP3155 | MMETSP0288-20130426_68652_1_1566 | 696   | 778   | 7.57E-019 | 84.22  | cl09936 | PP-binding           | ACP  |    |
| Vitrella brassicaformis CCMP3155 | MMETSP0288-20130426_68652_1_1566 | 837   | 1161  | 2.14E-078 | 262.59 | cl09931 | NADB_Rossmann        | SDR  |    |
| Vitrella brassicaformis CCMP3155 | MMETSP0288-20130426_68652_1_1566 | 1310  | 1493  | 3.87E-008 | 54.75  | cl19140 | Hydrolase_4          |      |    |
| Chromera velia CCMP2878          | MMETSP0290-20130426_10064_1_839  | 2     | 195   | 3.77E-041 | 155.23 | cl09931 | NADB_Rossmann        | KR   | N  |
| Chromera velia CCMP2878          | MMETSP0290-20130426_10064_1_839  | 261   | 345   | 1.75E-020 | 87.69  | cl09936 | PP-binding           | ACP  |    |
| Voromonas pontica GG             | comp4108_c1_seq1_4               | 3     | 157   | 4.83E-026 | 101.79 | cl09931 | NADB_Rossmann        | KR   | N  |
| Voromonas pontica GG             | comp4108_c1_seq1_4               | 234   | 295   | 2.58E-009 | 52.57  | cl09936 | PP-binding           | ACP  |    |
| Voromonas pontica GG             | comp7328_c0_seq1_8               | 1     | 51    | 2.34E-010 | 56.91  | cl09931 | NADB_Rossmann        | KR   | N  |
| Voromonas pontica GG             | comp7328_c0_seq1_8               | 93    | 166   | 1.95E-022 | 86.92  | cl09936 | PP-binding           | ACP  |    |
| Voromonas pontica GG             | comp7328_c2_seq1_7               | 1     | 120   | 1.98E-026 | 103.03 | cl16912 | MDR                  | ER   | N  |
| Voromonas pontica GG             | comp7328_c2_seq1_7               | 135   | 209   | 6.99E-010 | 54.45  | cl09931 | NADB_Rossmann        | KR   | C  |
| Lingulodinium polyedrum          | 346235801_9_1-2160               | 35    | 175   | 1.58E-016 | 80.79  | cl09931 | NADB_Rossmann        | KR   | C  |
| Lingulodinium polyedrum          | 346235801_9_1-2160               | 207   | 501   | 5.60E-099 | 309.11 | cl16912 | MDR                  | ER   | -  |
| Lingulodinium polyedrum          | 346235801_9_1-2160               | 510   | 720   | 2.56E-053 | 189.03 | cl09931 | NADB_Rossmann        | KR   | N  |
| Lingulodinium polyedrum          | 346254191_19_1415-3              | 1     | 254   | 1.83E-096 | 299.47 | cl09938 | cond_enzymes         | KS   | N  |
| Lingulodinium polyedrum          | 346254191_19_1415-3              | 273   | 471   | 1.67E-084 | 264.65 | cl08282 | Acyl_transf_1        | AT   | C  |
| Lingulodinium polyedrum          | 346254191_19_1415-3              | 349   | 785   | 7.38E-111 | 356.1  | cl09938 | cond_enzymes         | KS   | -  |
| Lingulodinium polyedrum          | 346305629_13_1-2883              | 65    | 496   | 1.96E-123 | 384.6  | cl09938 | cond_enzymes         | KS   | -  |
| Lingulodinium polyedrum          | 346305629_13_1-2883              | 593   | 628   | 1.66E-006 | 47.21  | cl09101 | E_set                |      | C  |
| Symbiodinium minutum             | 003781.t1                        | 285   | 334   | 2.41E-012 | 68.35  | cl00615 | Membrane-FADS-like   |      | NC |
| Symbiodinium minutum             | 003781.t1                        | 554   | 906   | 2.24E-108 | 356.87 | cl09938 | cond_enzymes         | KS   | -  |
| Symbiodinium minutum             | 003781.t1                        | 927   | 1234  | 1.61E-082 | 277.36 | cl08282 | Acyl_transf_1        | AT   | -  |
| Symbiodinium minutum             | 003781.t1                        | 1272  | 1558  | 1.19E-033 | 135.17 | cl00509 | hot_dog              | DH   | -  |
| Symbiodinium minutum             | 003781.t1                        | 1640  | 1757  | 1.36E-014 | 77.71  | cl09931 | NADB_Rossmann        | KR   | C  |
| Symbiodinium minutum             | 003781.t1                        | 1785  | 2060  | 1.10E-074 | 254.8  | cl16912 | MDR                  | ER   | -  |
| Symbiodinium minutum             | 003781.t1                        | 2068  | 2305  | 7.17E-067 | 235.26 | cl09931 | NADB_Rossmann        | KR   | N  |
| Symbiodinium minutum             | 003781.t1                        | 2344  | 2390  | 2.37E-005 | 45.7   | cl09936 | PP-binding           | ACP  | C  |
| Symbiodinium minutum             | 003781.t1                        | 3477  | 3792  | 3.35E-017 | 84.79  | cl19095 | Cyt_C5_DNA_methylase |      | -  |
| Symbiodinium minutum             | 003781.t1                        | 4109  | 4158  | 9.76E-007 | 50.46  | cl19088 | ANK                  |      | NC |
| Symbiodinium minutum             | 008781.t1                        | 1     | 114   | 1.93E-027 | 116.89 | cl09938 | cond_enzymes         | KS   | N  |
| Symbiodinium minutum             | 008781.t1                        | 142   | 440   | 4.58E-026 | 111.29 | cl00509 | hot_dog              | DH   | -  |
| Symbiodinium minutum             | 008781.t1                        | 511   | 649   | 4.79E-009 | 59.22  | cl09931 | NADB_Rossmann        | KR   | C  |
| Symbiodinium minutum             | 008781.t1                        | 677   | 1000  | 6.24E-082 | 274.06 | cl16912 | MDR                  |      | -  |
| Symbiodinium minutum             | 008781.t1                        | 1011  | 1240  | 1.32E-058 | 209.45 | cl09931 | NADB_Rossmann        | KR   | N  |
| Symbiodinium minutum             | 008781.t1                        | 1279  | 1360  | 2.42E-016 | 77.29  | cl09936 | PP-binding           | ACP  | -  |
| Symbiodinium minutum             | 008781.t1                        | 1367  | 1441  | 1.09E-015 | 75.36  | cl09936 | PP-binding           | ACP  | -  |
| Symbiodinium minutum             | 008781.t1                        | 1477  | 1880  | 2.15E-160 | 501.7  | cl09938 | cond_enzymes         | KS   | -  |
| Symbiodinium minutum             | 008781.t1                        | 1924  | 2080  | 8.14E-020 | 92.03  | cl00509 | hot_dog              | DH   | C  |
| Symbiodinium minutum             | 008782.t1                        | 9     | 336   | 2.44E-080 | 272.24 | cl09931 | NADB_Rossmann        | KR   | -  |
| Symbiodinium minutum             | 008782.t1                        | 375   | 449   | 2.97E-016 | 76.91  | cl09936 | PP-binding           | ACP  | -  |
| Symbiodinium minutum             | 008782.t1                        | 476   | 888   | 8.22E-149 | 467.42 | cl09938 | cond_enzymes         | KS   | -  |
| Symbiodinium minutum             | 008782.t1                        | 999   | 1374  | 3.45E-050 | 184.8  | cl09931 | NADB_Rossmann        | KR   | -  |
| Symbiodinium minutum             | 008782.t1                        | 1407  | 1484  | 9.88E-015 | 72.28  | cl09936 | PP-binding           | ACP  | -  |
| Symbiodinium minutum             | 008782.t1                        | 1521  | 1840  | 1.65E-118 | 381.91 | cl09938 | cond_enzymes         | KS   | C  |
| Symbiodinium minutum             | 008783.t1                        | 15    | 283   | 8.37E-032 | 125.16 | cl00509 | hot_dog              | DH   | -  |
| Symbiodinium minutum             | 008783.t1                        | 376   | 492   | 8.68E-013 | 69.24  | cl09931 | NADB_Rossmann        | KR   | C  |
| Symbiodinium minutum             | 008783.t1                        | 521   | 557   | 1.37E-009 | 58.35  | cl16912 | MDR                  | ER   | C  |
| Symbiodinium minutum             | 008784.t1                        | 2     | 87    | 1.94E-011 | 63.74  | cl16912 | MDR                  | ER   | N  |
| Symbiodinium minutum             | 008784.t1                        | 89    | 331   | 1.29E-059 | 203.29 | cl09931 | NADB_Rossmann        | KR   | N  |
| Symbiodinium minutum             | 008784.t1                        | 383   | 424   | 1.74E-005 | 43.01  | cl09936 | PP-binding           | ACP  | C  |
| Symbiodinium minutum             | 008784.t1                        | 452   | 514   | 2.85E-007 | 48.4   | cl09936 | PP-binding           | ACP  | C  |
| Symbiodinium minutum             | 012436.t1                        | 88    | 303   | 3.77E-041 | 158.72 | cl08282 | Acyl_transf_1        | AT   | N  |
| Symbiodinium minutum             | 012436.t1                        | 441   | 723   | 7.46E-014 | 75.42  | cl19241 | Condensation         | KS   | -  |
| Symbiodinium minutum             | 012436.t1                        | 884   | 1295  | 1.79E-130 | 424.7  | cl17068 | AFD_class_I          | FAAL | -  |
| Symbiodinium minutum             | 012436.t1                        | 1795  | 2124  | 3.78E-073 | 256.33 | cl09938 | cond_enzymes         | KS   | -  |
| Symbiodinium minutum             | 012436.t1                        | 2149  | 2425  | 6.60E-023 | 103.97 | cl00509 | hot_dog              | DH   | -  |
| Symbiodinium minutum             | 012436.t1                        | 2518  | 2846  | 1.14E-054 | 200.97 | cl09931 | NADB_Rossmann        | KR   | -  |
| Symbiodinium minutum             | 012436.t1                        | 2907  | 2958  | 1.14E-005 | 47.56  | cl09936 | PP-binding           | ACP  | N  |
| Symbiodinium minutum             | 012436.t1                        | 3054  | 3457  | 3.32E-124 | 404.25 | cl09938 | cond_enzymes         | KS   | -  |
| Symbiodinium minutum             | 012436.t1                        | 3749  | 3976  | 4.90E-016 | 82.4   | cl00509 | hot_dog              | DH   | -  |
| Symbiodinium minutum             | 012436.t1                        | 4156  | 4254  | 4.97E-013 | 70.1   | cl17173 | AdoMet_MTases        |      | -  |
| Symbiodinium minutum             | 012436.t1                        | 4267  | 4576  | 5.15E-036 | 145.6  | cl09931 | NADB_Rossmann        | KR   | N  |
| Symbiodinium minutum             | 012436.t1                        | 4706  | 5110  | 2.51E-095 | 320.66 | cl09938 | cond_enzymes         | KS   | -  |
| Symbiodinium minutum             | 012436.t1                        | 5220  | 5265  | 1.90E-003 | 43.55  | cl08282 | Acyl_transf_1        | AT   | C  |
| Symbiodinium minutum             | 012436.t1                        | 5536  | 5844  | 1.60E-043 | 165.56 | cl19241 | Condensation         | KS   | -  |
| Symbiodinium minutum             | 012436.t1                        | 5870  | 5929  | 6.09E-013 | 68.8   | cl07150 | NRPS                 |      | -  |
| Symbiodinium minutum             | 012436.t1                        | 6040  | 6470  | 1.42E-143 | 461.14 | cl17068 | AFD_class_I          | FAAL | -  |
| Symbiodinium minutum             | 012436.t1                        | 6829  | 6868  | 2.81E-007 | 56.4   | cl17068 | AFD_class_I          | FAAL | N  |
| Symbiodinium minutum             | 012436.t1                        | 6979  | 7249  | 1.77E-042 | 162.48 | cl19241 | Condensation         | KS   | -  |
| Symbiodinium minutum             | 012436.t1                        | 7273  | 7375  | 1.25E-007 | 54.03  | cl16371 | HxxPF_rpt            |      | -  |
| Symbiodinium minutum             | 012436.t1                        | 7467  | 7723  | 1.45E-069 | 246.59 | cl17068 | AFD_class_I          | FAAL | N  |
| Symbiodinium minutum             | 012436.t1                        | 7852  | 8257  | 6.08E-100 | 334.14 | cl09938 | cond_enzymes         | KS   | -  |
| Symbiodinium minutum             | 012436.t1                        | 8331  | 8571  | 8.52E-017 | 84.71  | cl00509 | hot_dog              | DH   | -  |
| Symbiodinium minutum             | 012436.t1                        | 8667  | 9037  | 2.53E-067 | 237.95 | cl09931 | NADB_Rossmann        | KR   | -  |
| Symbiodinium minutum             | 012436.t1                        | 9082  | 9142  | 2.62E-003 | 40.63  | cl09936 | PP-binding           | ACP  | -  |
| Symbiodinium minutum             | 012436.t1                        | 9172  | 9582  | 1.62E-128 | 416.96 | cl09938 | cond_enzymes         | KS   | -  |
| Symbiodinium minutum             | 012436.t1                        | 9730  | 10068 | 5.56E-051 | 189.9  | cl09931 | NADB_Rossmann        | KR   | -  |
| Symbiodinium minutum             | 012436.t1                        | 10213 | 10427 | 4.85E-019 | 91.73  | cl19140 | Hydrolase_4          |      | -  |
| Symbiodinium minutum             | 015786.t1                        | 1     | 207   | 3.45E-061 | 209.73 | cl16912 | MDR                  | ER   | N  |
| Symbiodinium minutum             | 015786.t1                        | 233   | 452   | 3.01E-047 | 173.24 | cl09931 | NADB_Rossmann        | KR   | N  |

|                      |           |      |      |           |        |         |               |     |   |
|----------------------|-----------|------|------|-----------|--------|---------|---------------|-----|---|
| Symbiodinium minutum | 015786.t1 | 498  | 581  | 5.97E-021 | 89.23  | cl09936 | PP-binding    | ACP | - |
| Symbiodinium minutum | 015786.t1 | 625  | 893  | 6.91E-020 | 90.19  | cl19140 | Hydrolase_4   |     | - |
| Symbiodinium minutum | 015788.t1 | 30   | 195  | 4.03E-048 | 169.2  | cl09931 | NADB_Rossmann | KR  | - |
| Symbiodinium minutum | 015788.t1 | 288  | 363  | 3.06E-015 | 72.67  | cl09936 | PP-binding    | ACP | - |
| Symbiodinium minutum | 015788.t1 | 393  | 805  | 1.60E-148 | 447.39 | cl09938 | cond_enzymes  | KS  | - |
| Symbiodinium minutum | 015789.t1 | 104  | 503  | 1.75E-070 | 241.42 | cl09931 | NADB_Rossmann | KR  | - |
| Symbiodinium minutum | 015789.t1 | 541  | 615  | 1.13E-015 | 74.59  | cl09936 | PP-binding    | ACP | - |
| Symbiodinium minutum | 015789.t1 | 639  | 1067 | 7.74E-144 | 443.92 | cl09938 | cond_enzymes  | KS  | - |
| Symbiodinium minutum | 026959.t1 | 1    | 150  | 1.78E-011 | 65.07  | cl00509 | hot_dog       | DH  | N |
| Symbiodinium minutum | 026959.t1 | 280  | 373  | 4.65E-004 | 42.27  | cl09931 | NADB_Rossmann | KR  | C |
| Symbiodinium minutum | 026959.t1 | 404  | 694  | 1.52E-096 | 310.66 | cl16912 | MDR           | ER  | - |
| Symbiodinium minutum | 026959.t1 | 701  | 930  | 7.00E-058 | 205.31 | cl09931 | NADB_Rossmann | KR  | N |
| Symbiodinium minutum | 026959.t1 | 973  | 1074 | 1.02E-014 | 71.51  | cl09936 | PP-binding    | ACP | - |
| Symbiodinium minutum | 029496.t1 | 1252 | 1316 | 3.11E-007 | 51.09  | cl15299 | VCBS          |     | - |
| Symbiodinium minutum | 029496.t1 | 1305 | 1371 | 3.71E-006 | 48.01  | cl15299 | VCBS          |     | - |
| Symbiodinium minutum | 029496.t1 | 1633 | 1733 | 2.87E-006 | 48.96  | cl19082 | TNFR          |     | - |
| Symbiodinium minutum | 029496.t1 | 1716 | 1812 | 9.09E-009 | 56.67  | cl19082 | TNFR          |     | - |
| Symbiodinium minutum | 029496.t1 | 2220 | 2618 | 5.65E-123 | 399.63 | cl09938 | cond_enzymes  | KS  | - |
| Symbiodinium minutum | 029496.t1 | 2651 | 2928 | 1.46E-034 | 137.87 | cl00509 | hot_dog       | DH  | - |
| Symbiodinium minutum | 029496.t1 | 3030 | 3389 | 3.77E-070 | 244.89 | cl09931 | NADB_Rossmann | KR  | - |
| Symbiodinium minutum | 029496.t1 | 3422 | 3495 | 1.19E-015 | 76.52  | cl09936 | PP-binding    | ACP | - |
| Symbiodinium minutum | 029496.t1 | 3523 | 3931 | 1.81E-134 | 432.75 | cl09938 | cond_enzymes  | KS  | - |
| Symbiodinium minutum | 029496.t1 | 4078 | 4378 | 7.99E-037 | 146.66 | cl09931 | NADB_Rossmann | KR  | N |
| Symbiodinium minutum | 029496.t1 | 4409 | 4489 | 1.25E-016 | 79.22  | cl09936 | PP-binding    | ACP | - |
| Symbiodinium minutum | 029496.t1 | 4533 | 4940 | 4.89E-140 | 448.55 | cl09938 | cond_enzymes  | KS  | - |
| Symbiodinium minutum | 039996.t1 | 1    | 253  | 2.61E-085 | 279.83 | cl09938 | cond_enzymes  | KS  | C |
| Symbiodinium minutum | 039996.t1 | 289  | 591  | 3.51E-111 | 343.62 | cl08282 | Acyl_transf_1 | AT  | - |
| Symbiodinium minutum | 039996.t1 | 627  | 780  | 1.07E-020 | 92.8   | cl00509 | hot_dog       | DH  | C |
| Symbiodinium minutum | 040601.t1 | 53   | 347  | 1.41E-071 | 230.15 | cl16912 | MDR           | ER  | - |
| Symbiodinium minutum | 040601.t1 | 359  | 448  | 8.97E-017 | 77.52  | cl09931 | NADB_Rossmann | KR  | C |

<sup>1</sup> See Fig. 3A and Table S2 for domain organization and names, respectively. Note that FAAL domains in *Symbiodinium* are highly divergent and phylogenetically distant to those in *Cryptosporidium* and chrompodellids.

<sup>2</sup> N=incomplete at N-terminus; C=incomplete at C-terminus
